# Supplementary material for: Nano-NiFe2O4 as a versatile and recyclable catalyst: an efficient protocol for the synthesis of aryl-1,2,4-triazolidine-3-thiones under ball milling conditions
Source: Royal Society of Chemistry journal article supplement (doi:10.1039/d6na00160b), 2026-05-29
Supplement: d6na00160b1.pdf [file d6na00160b1.pdf]

## Nano-NiFe<sub>2</sub>O<sub>4</sub> as a Versatile and Recyclable Catalyst: An Efficient Protocol for the Synthesis of Aryl-1,2,4-triazolidine-3-thiones under Ball Milling Conditions

Pankaj V. Ledade,<sup>1,3</sup> Trimurti L. Lambat,<sup>2\*</sup> Jitendra K. Gunjate,<sup>3</sup> Pooja M. Kadu,<sup>4</sup> Utpal J. Dongre,<sup>4</sup> Amitkumar V. Bhute,<sup>5</sup> Twinkle S. Wankhede,<sup>6</sup> Sami H. Mahmood,<sup>7,\*</sup> and Subhash Banerjee<sup>8,\*</sup>

### Supporting Information

| SI. No. | Content                                                                                                                                  |
|---------|------------------------------------------------------------------------------------------------------------------------------------------|
| SI 1    | General information                                                                                                                      |
| SI 2    | Experimental procedure for the preparation of NiFe <sub>2</sub> O <sub>4</sub>                                                           |
| SI 3    | Experimental procedure for the preparation of CuFe <sub>2</sub> O <sub>4</sub>                                                           |
| SI 4    | Experimental procedure for the preparation of CoFe <sub>2</sub> O <sub>4</sub>                                                           |
| SI 5    | Experimental procedure for the preparation of ZnFe <sub>2</sub> O <sub>4</sub>                                                           |
| SI 6    | Synthesis of 5-aryl-1,2,4- triazolidine-3-thione scaffolds                                                                               |
| SI 7    | Copy of FTIR, <sup>1</sup> H NMR, <sup>13</sup> C NMR Spectra, HRMS spectra of 5-aryl-1,2,4- triazolidine-3-thione scaffolds (3a-3n)     |
| SI 8    | <b>Table 1:</b> Optimisation of reaction conditions <sup>a</sup>                                                                         |
| SI 9    | <b>Table 2:</b> Effect of reaction conditions on the yield of (3a).                                                                      |
| SI 10   | <b>Table 3:</b> Comparison of Nano NiFe <sub>2</sub> O <sub>4</sub> -catalyzed conventional methodologies for the synthesis of (3a).     |
| SI 11   | <b>Table 4:</b> Calculation of Green Chemistry Metrics (EcoScale and E-factor, Atom economy) under ball-milling and conventional method. |
| SI 12   | References                                                                                                                               |

#### SI 1: General information

The chemicals needed were sourced from SRL, TCI, and ANCOTT, and they were all used without further purification. We used a Retsch Agate Grinding Jar (250 mL capacity) with the Planetary Ball Mill 100. The model number is 01.462.0220. All of the identified products showed physical and chemical properties that were almost identical to the real materials, including <sup>1</sup>H NMR, <sup>13</sup>C NMR, FT-IR, and mass spectra. Using a melting point B-540 instrument, the melting points were determined. The <sup>1</sup>H NMR and <sup>13</sup>C NMR data were collected at SAIF, Punjab University, Chandigarh, India, using Bruker Avance Neo, 500 MHz NMR spectrometers, and HRMS. This FT-IR data was acquired by using SHIMADU at RTM, Nagpur University.

**SI2: The experimental procedure for the preparation of NiFe<sub>2</sub>O<sub>4</sub> nanoparticles:**

The NiFe<sub>2</sub>O<sub>4</sub> nanoparticles were synthesised via a straightforward sol-gel method<sup>61</sup> using readily available precursors: ferric chloride (FeCl<sub>3</sub>·6H<sub>2</sub>O), nickel chloride (NiCl<sub>2</sub>·6H<sub>2</sub>O), distilled water, and sodium hydroxide. In the typical procedure, a 0.2 M ferric chloride solution (20 mL) and a 0.1 M nickel chloride solution (20 mL) were prepared and mixed under vigorous stirring for 2 hours at 80 °C. Subsequently, 0.3 M NaOH was incrementally added until the pH reached 12, resulting in the formation of brown precipitates. The precipitates were then isolated through centrifugation and dried in a hot air oven for 4 hours at 100 °C, followed by calcination at 550 °C for 6 hours.

**SI3: The experimental procedure for the preparation of CuFe<sub>2</sub>O<sub>4</sub> nanoparticles:**

The synthesis of CuFe<sub>2</sub>O<sub>4</sub> nanoparticles was conducted in accordance with established methodologies as documented in the literature<sup>62</sup>. A solution comprising Cu(NO<sub>3</sub>)<sub>2</sub> (0.001 mol) and FeCl<sub>3</sub>·6H<sub>2</sub>O (0.002 mol) was prepared, maintaining a stoichiometric molar ratio of Cu<sup>2+</sup>/Fe<sup>3+</sup> at 1:2. The mixture was subjected to vigorous stirring for a duration of 2 hours at a temperature of 80 °C. Subsequently, a 0.3 M NaOH solution was incrementally added to the solutions until a pH of 12 was attained, resulting in the formation of a black precipitate. The sample was subsequently subjected to centrifugation, followed by washing with distilled water, and then placed in a hot air oven for drying at 100 °C for a duration of 4 hours. Then the resulting powder was calcinated at 550° C in a furnace for 2 hours.

**SI4: The experimental procedure for the preparation of CoFe<sub>2</sub>O<sub>4</sub> nanoparticles:**

CoFe<sub>2</sub>O<sub>4</sub> nanoparticles were synthesized in accordance with established methodologies documented in the literature<sup>63</sup>. Initially, a homogeneous solution of 2.0 g of anhydrous sodium acetate was prepared in 30 mL of ethylene glycol through vigorous stirring at room temperature. Subsequently, 1.5 mmol of CoCl<sub>2</sub>·6H<sub>2</sub>O and 3.0 mmol of FeCl<sub>3</sub>·6H<sub>2</sub>O were added slowly to the homogeneous sodium acetate solution, maintaining a stoichiometric molar ratio of Co<sup>2+</sup>/Fe<sup>3+</sup> of 1:2. The mixture was subjected to vigorous stirring at a temperature of 70 °C for a duration of 2 hours to achieve a homogeneous solution. The solution was subsequently subjected to centrifugation, followed by washing with distilled water and drying in an open atmospheric environment. The resultant powder underwent calcination at a temperature of 550° C within a furnace for a duration of 2 hours.

#### SI5: The experimental procedure for the preparation of ZnFe<sub>2</sub>O<sub>4</sub> nanoparticles:

ZnFe<sub>2</sub>O<sub>4</sub> nanoparticles were synthesized utilizing a previously established methodology<sup>64</sup>. A mixture of Zn(NO<sub>3</sub>)<sub>2</sub>·6H<sub>2</sub>O (0.1 M) and Fe(NO<sub>3</sub>)<sub>3</sub>·9H<sub>2</sub>O (0.2 M) was prepared, maintaining a stoichiometric molar ratio of Zn<sup>2+</sup>/Fe<sup>3+</sup> of 1:2, in 50 mL of distilled water. Gelation was achieved through the addition of 0.1 M urea solution (300 mL). The resultant solution was subjected to vigorous mixing under stirring conditions at 55 °C until gel formation occurred. This gel was subsequently dried at 100 °C for a duration of 1 hour in a hot air oven. The resultant dried gel underwent calcination at a temperature of 550° C within a furnace for a duration of 2 hours.

#### SI6: General Procedure for synthesis of 5-aryl-1,2,4- triazolidine-3-thione scaffolds

*Representative procedure for the: 5-phenyl-1,2,4- triazolidine-3-thione (3a)*

Ball-milling of a 25 mL stainless steel beaker at a rotation rate of 600 rpm took place during 30 minutes using six milling balls with nominal diameter (1/4 10 mm). In this process, Nano NiFe<sub>2</sub>O<sub>4</sub> (10 mol%, 23.44 mg) as a catalyst was added to benzaldehyde 1a (1.0 mmol 106.12mg), thiosemicarbazide (1 mmol 91.14mg) / 4-methylthiosemicarbazide (1 mmol 105.17mg). The operation of ball-milling was carried out by reversing directions of rotation, with a 30-second pause between consecutive sessions of milling. After the reaction was complete, an external magnet was used to collect the NiFe<sub>2</sub>O<sub>4</sub> nanoparticles out of the reaction medium. The crude product (3a) was then recrystallized using ethanol. The recovered nano NiFe<sub>2</sub>O<sub>4</sub> was washed with a solution of ethanol and water, 1:1, after which it was dried in a hot-air oven at 60 ° C for 1 hour duration. The catalyst was dried and reused in subsequent cycles of reaction.

#### SI7: FTIR,<sup>1</sup>H NMR,<sup>13</sup>C NMR Spectra of 5-aryl-1,2,4- triazolidine-3-thione scaffolds (3a-3n)

##### 5-phenyl-1,2,4-triazolidine-3-thione (3a)

White solid; M.P. 153-154 °C; IR (KBr): 3418, 3252, 3149, 1588, 1539, 1471, 1446, 1373, 1294,1226, 1102, 1053, 955, 867, 810, 761, 690 cm<sup>-1</sup>; <sup>1</sup>H-NMR (500 MHz, DMSO-d<sub>6</sub>) : δ 7.3949-7.4256 (t, 3H, J=15.5Hz), 7.7977-7.8171 (q, 2H, J=10Hz), 8.0057 (s, 1H, -NH), 8.0823 (s, 1H), 8.2228 (s, 1H, -NH), 11.4549 (s, 1H, -NH). <sup>13</sup>C-NMR (500 MHz, DMSO-d<sub>6</sub>): 127.18, 128.54, 129.73, 134.06, 142.20, 177.91; HRMS {observed [M+1] peak: 180.05 (m/z)} {calculated [M] peak: 179.25 (m/z)}

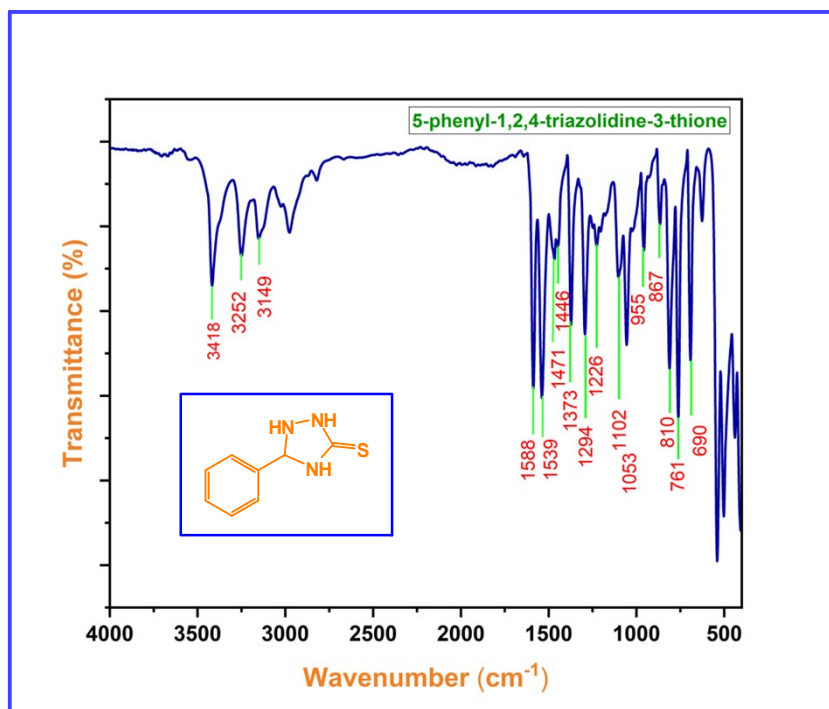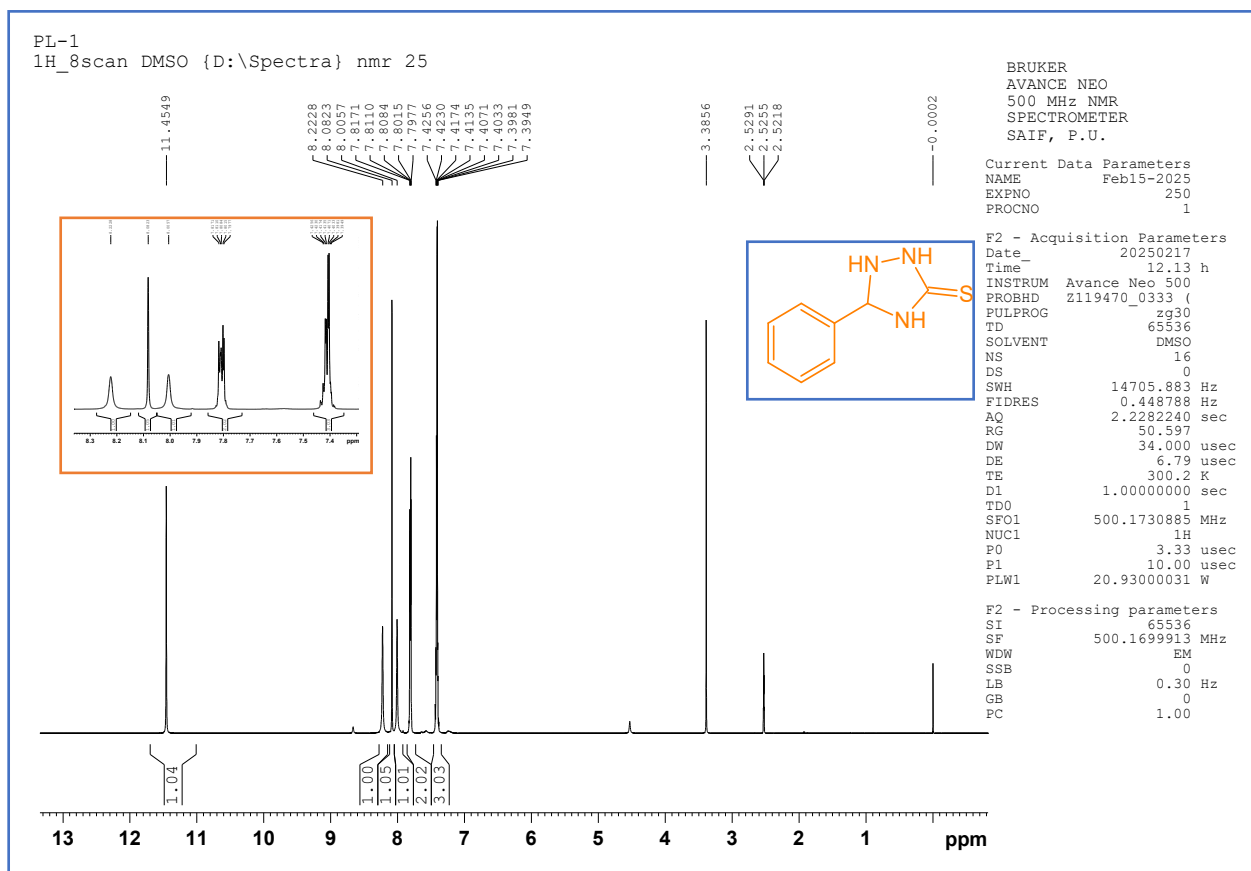

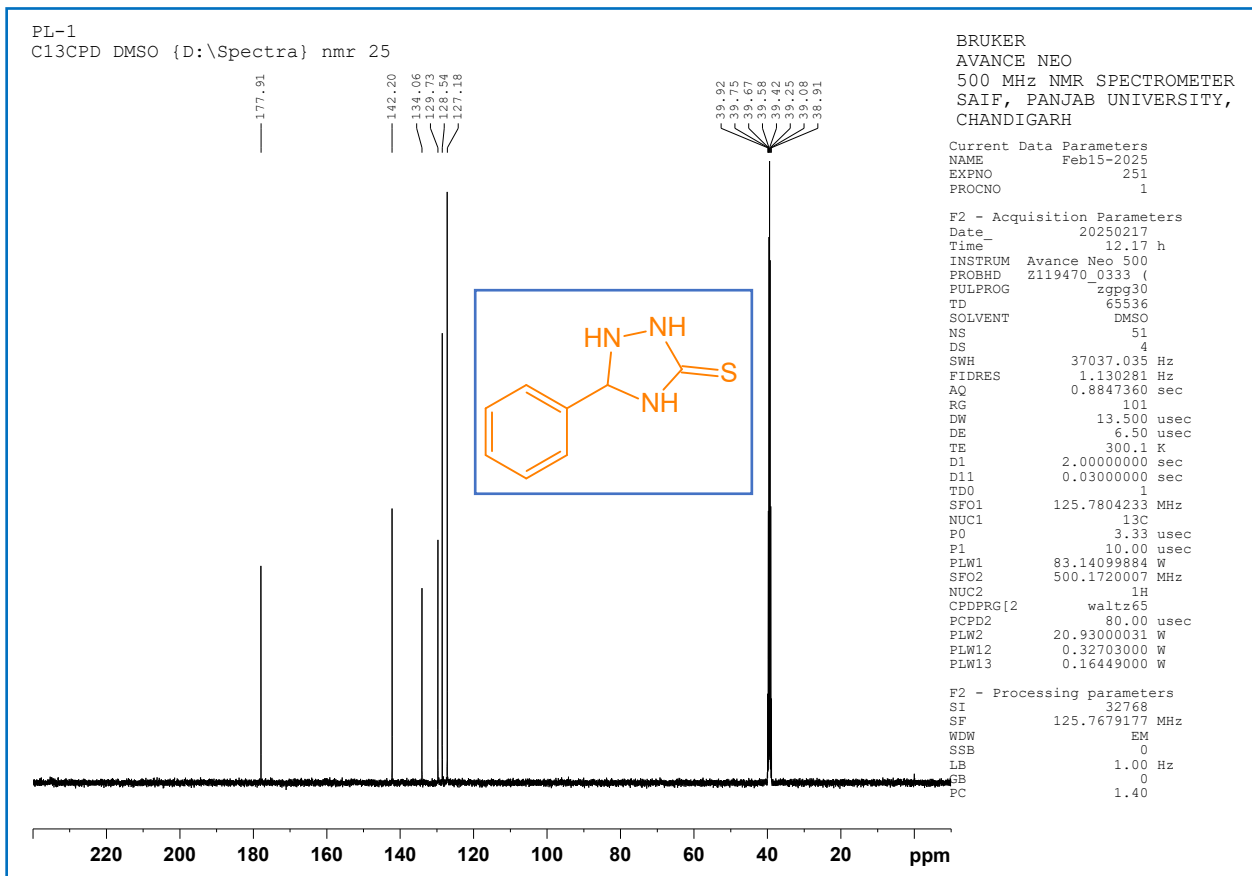

### <sup>13</sup>C-NMR of 5-phenyl-1,2,4-triazolidine-3-thione (3a)

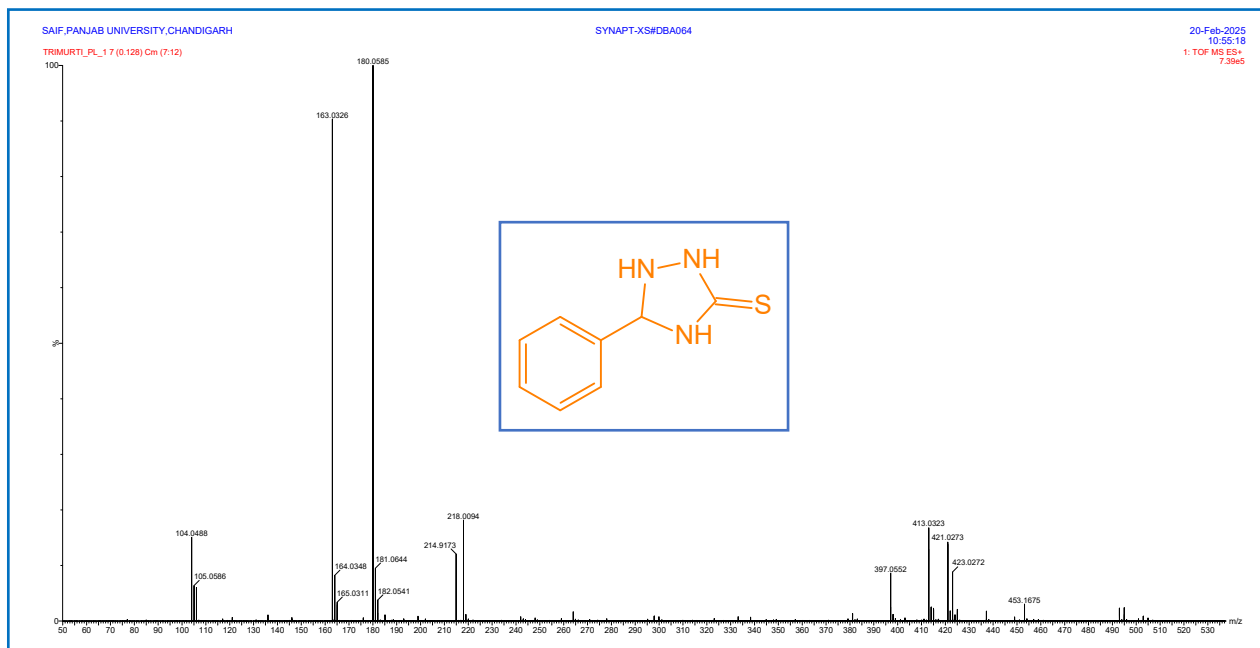

### HRMS of 5-phenyl-1,2,4-triazolidine-3-thione (3a)

### 5-(2-chlorophenyl)-1,2,4-triazolidine-3-thione (3b)

White crystal, Mp. 200-201 °C; IR (KBr): 3412, 3247, 3148, 2978, 1613, 1512, 1464, 1374, 1286, 1226, 1100, 1048, 946, 870, 751, 608, 496 cm<sup>-1</sup>; <sup>1</sup>H-NMR (500 MHz, DMSO-d<sub>6</sub>): δ 7.3561-7.4322 (m, 2H, ArH, *J*=38.45Hz), 7.4785-7.496 (m, 1H, ArH, *J*=9Hz), 8.122 (s, 1H, CH), 8.303-8.322 (m, 1H, ArH, *J*=9.5Hz), 8.28 (s, 1H, NH), 8.4977 (s, 1H, NH), 11.6407 (s, 1H, NH); <sup>13</sup>C-NMR (500 MHz, DMSO-d<sub>6</sub>): 127.19, 127.32, 129.60, 131.03, 131.37, 133.01, 138.07, 178.14; HRMS {observed [M+1] peak: 214.02 (m/z)} {calculated [M] peak: 213.69 (m/z)}

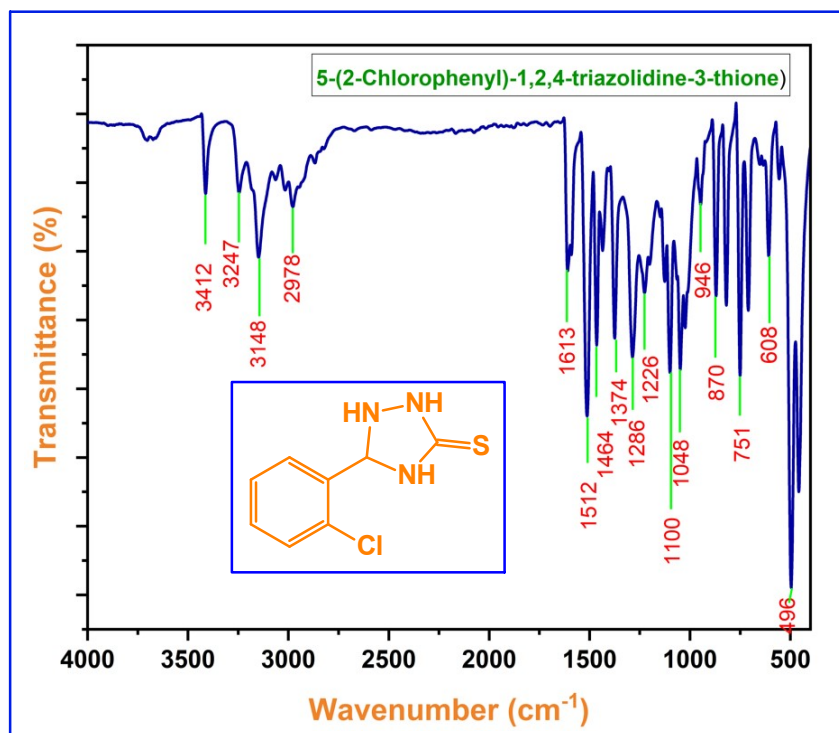

FTIR of 5-(2-chlorophenyl)-1,2,4-triazolidine-3-thione (3b)

PVL3b  
1H\_8scan DMSO {D:\Spectra} nmr 47

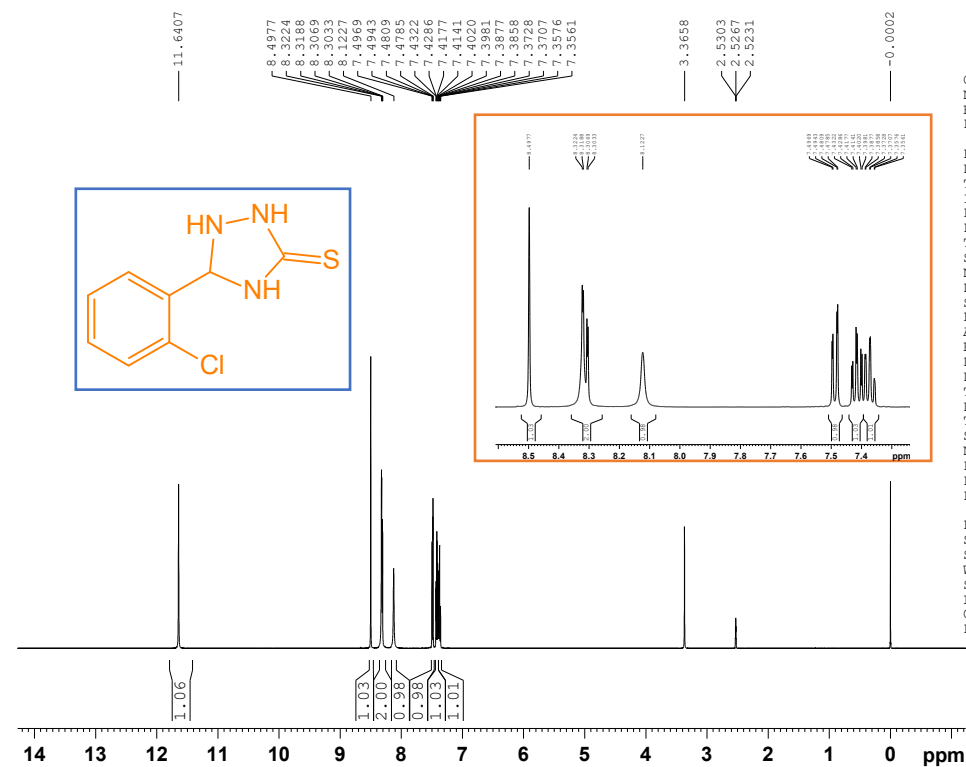

BRUKER  
AVANCE NEO  
500 MHz NMR  
SPECTROMETER  
SAIF, P.U.

Current Data Parameters  
NAME Apr08-2025  
EXPNO 470  
PROCNO 1

F2 - Acquisition Parameters  
Date\_ 20250409  
Time 4.23 h  
INSTRUM Avance Neo 500  
PROBHD Z119470\_0333 (  
PULPROG zg30  
TD 65536  
SOLVENT DMSO  
NS 16  
DS 0  
SWH 14705.883 Hz  
FIDRES 0.448788 Hz  
AQ 2.2282240 sec  
RG 95.7854  
DW 34.000 usec  
DE 6.79 usec  
TE 300.2 K  
D1 1.0000000 sec  
TD0 1  
SFO1 500.1730885 MHz  
NUC1 1H  
P0 3.33 usec  
P1 10.00 usec  
PLW1 20.9300031 W

F2 - Processing parameters  
SI 65536  
SF 500.1699904 MHz  
WDW EM  
SSB 0  
LB 0.30 Hz  
GB 0  
PC 1.00

<sup>1</sup>H NMR of 5-(2-chlorophenyl)-1,2,4-triazolidine-3-thione (3b)

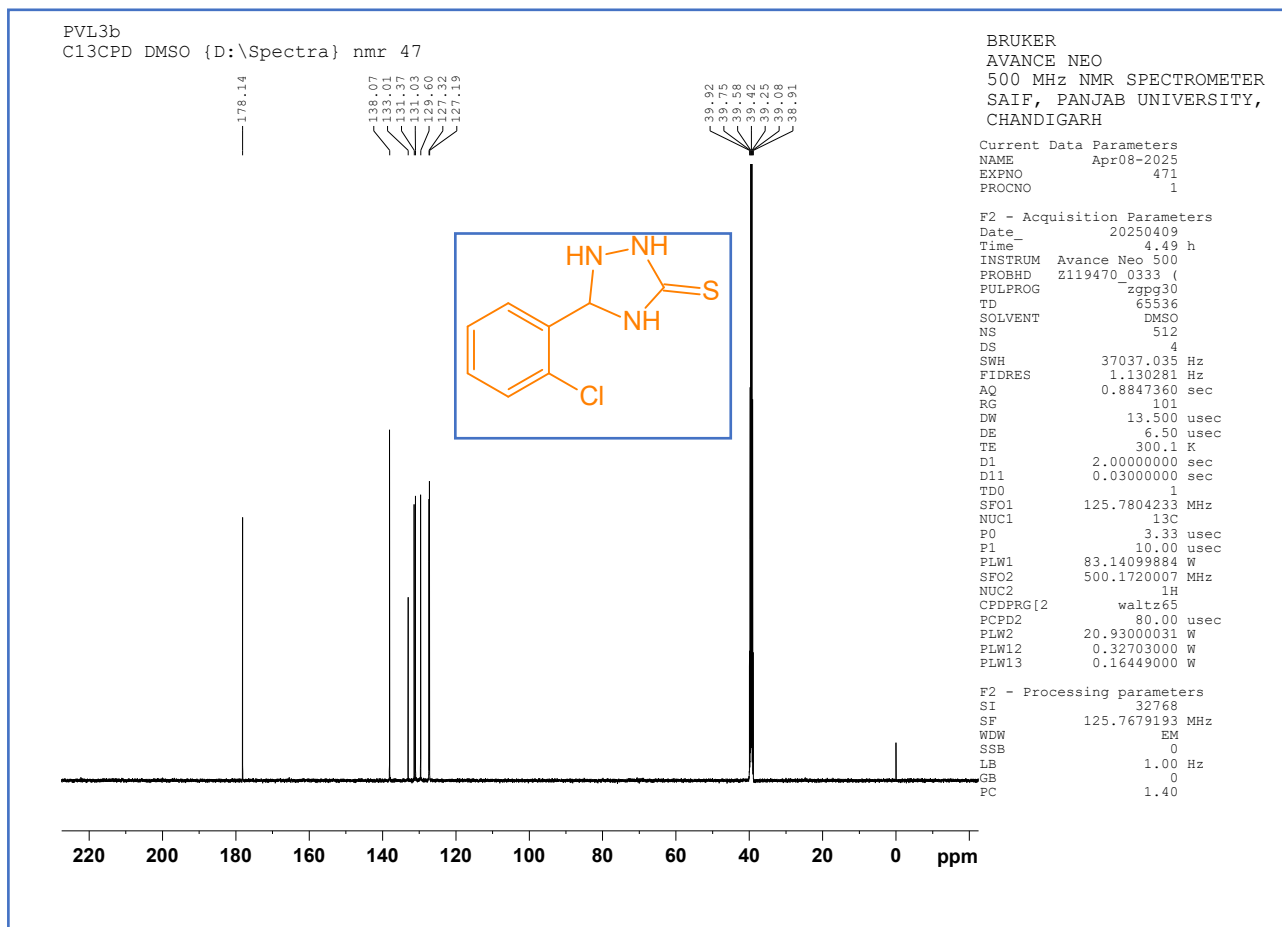

<sup>13</sup>C-NMR of 5-(2-chlorophenyl)-1,2,4-triazolidine-3-thione (3b)

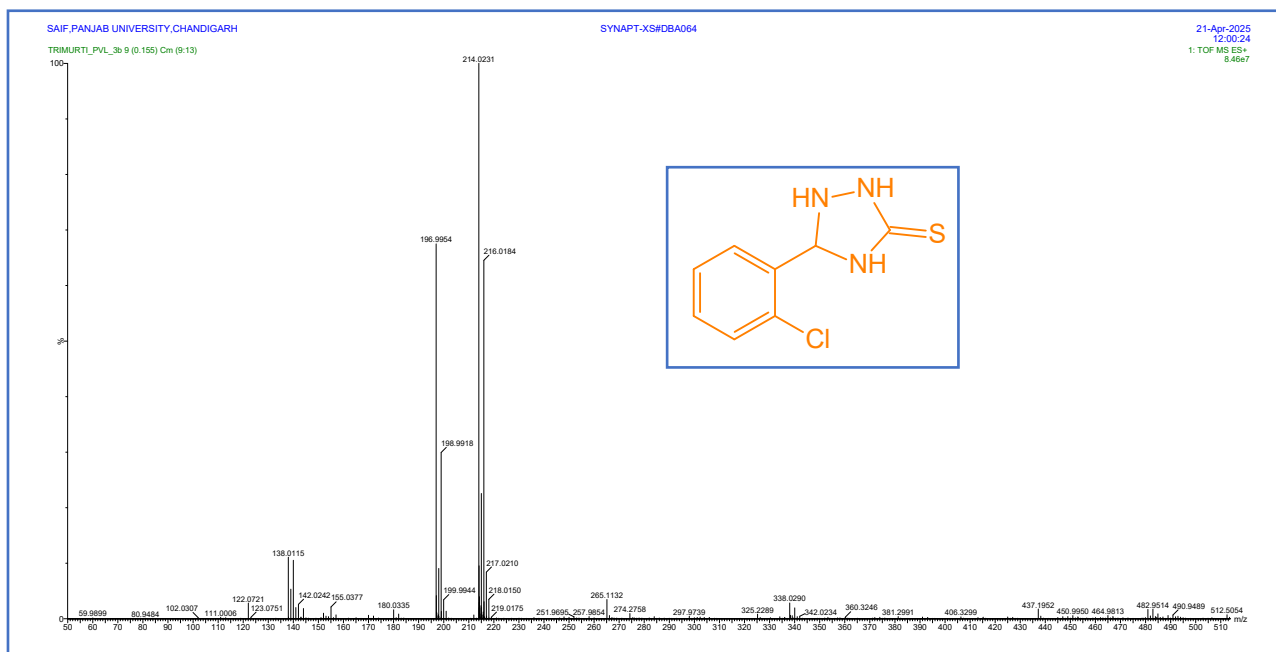

**HRMS of 5-(2-chlorophenyl)-1,2,4-triazolidine-3-thione (3b)**

### 5-(4-Nitrophenyl)-1,2,4-triazolidine-3-thione (3c)

Yellow solid, Mp. 227-228 °C; IR (KBr): 3360, 2995, 1579, 1512, 1450, 1338, 1283, 1174, 1092, 1021, 922, 851, 687, 561  $\text{cm}^{-1}$ ;  $^1\text{H-NMR}$  (500 MHz, DMSO- $d_6$ ):  $\delta$  8.0926-8.1104 (d, 2H, ArH,  $J = 9$  Hz), 8.2200-8.2378 (d, 2H, ArH,  $J = 8.5$  Hz), 8.1413 (s, 1H, CH), 8.2604 (s, 1H, NH), 8.4120 (s, 1H, NH), 11.7188 (s, 1H, NH);  $^{13}\text{C-NMR}$  (500 MHz, DMSO- $d_6$ ): 123.65, 128.04, 139.43, 140.62, 147.46, 178.40; HRMS {observed  $[\text{M}+1]$  peak: 225.04 (m/z)} {calculated  $[\text{M}]$  peak: 224.24 (m/z)}.

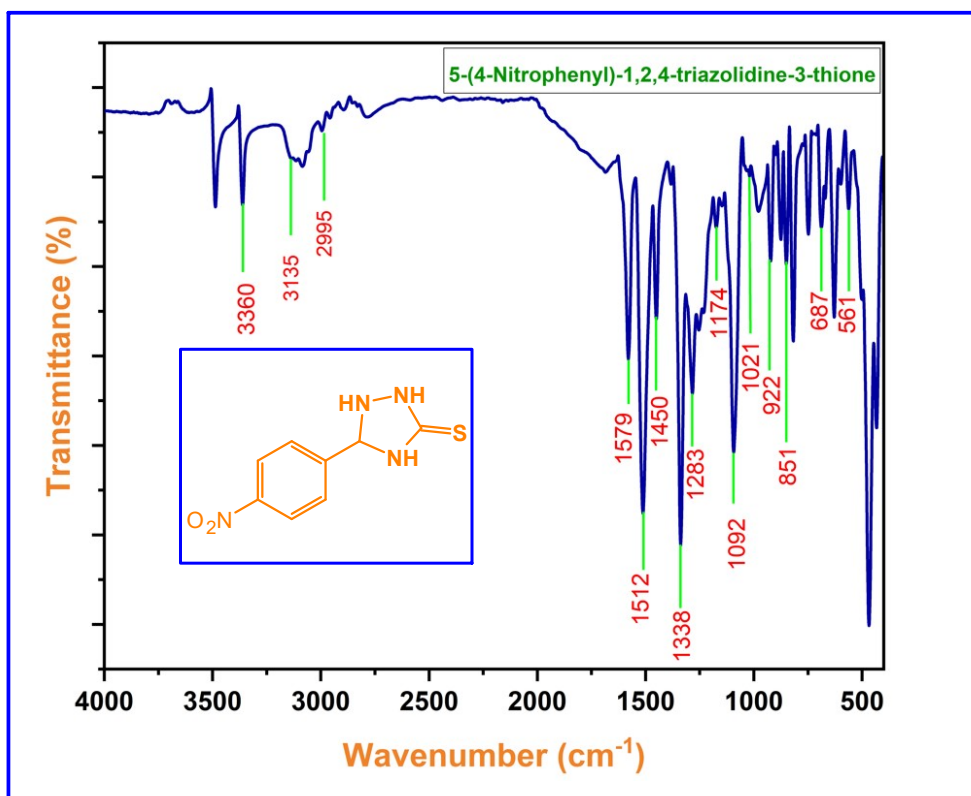

FTIR of 5-(4-Nitrophenyl)-1,2,4-triazolidine-3-thione (3c)

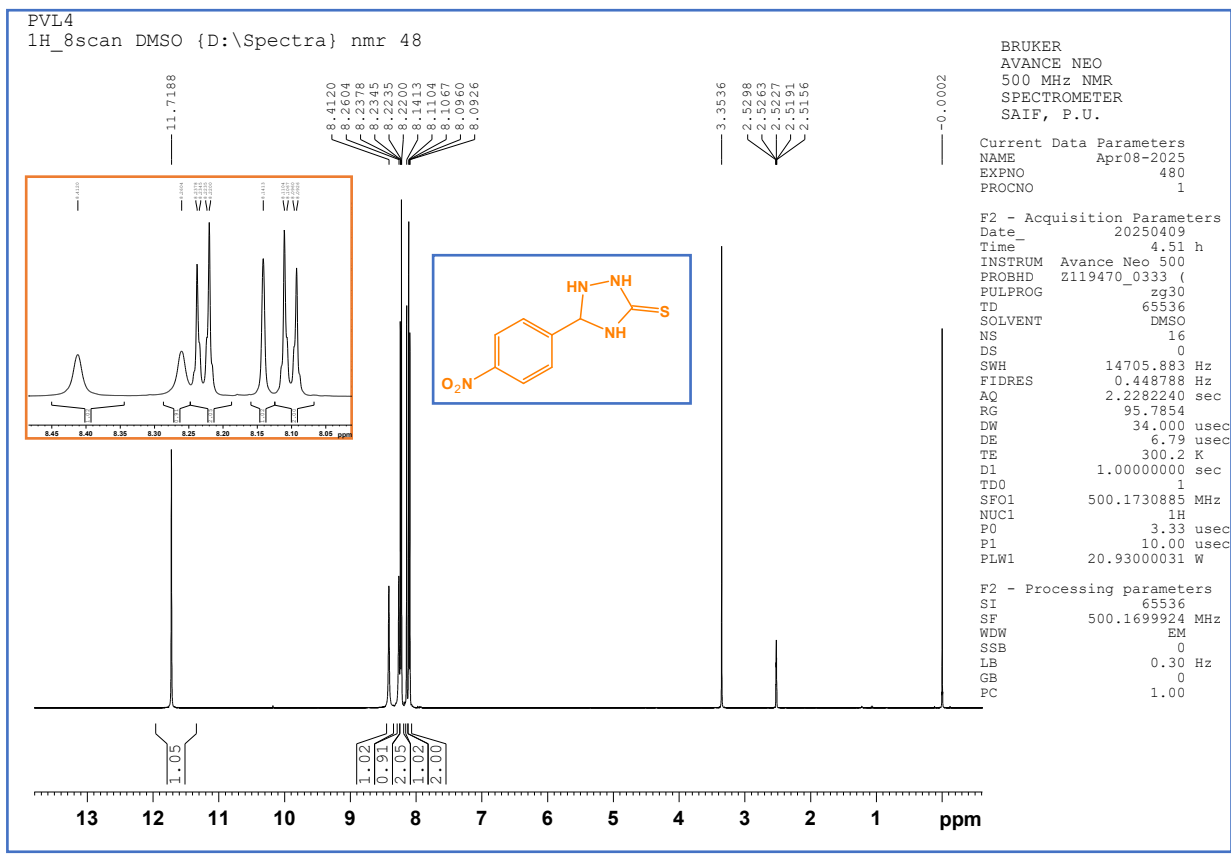

**<sup>1</sup>HNMR of 5-(4-Nitrophenyl)-1,2,4-triazolidine-3-thione (3c)**

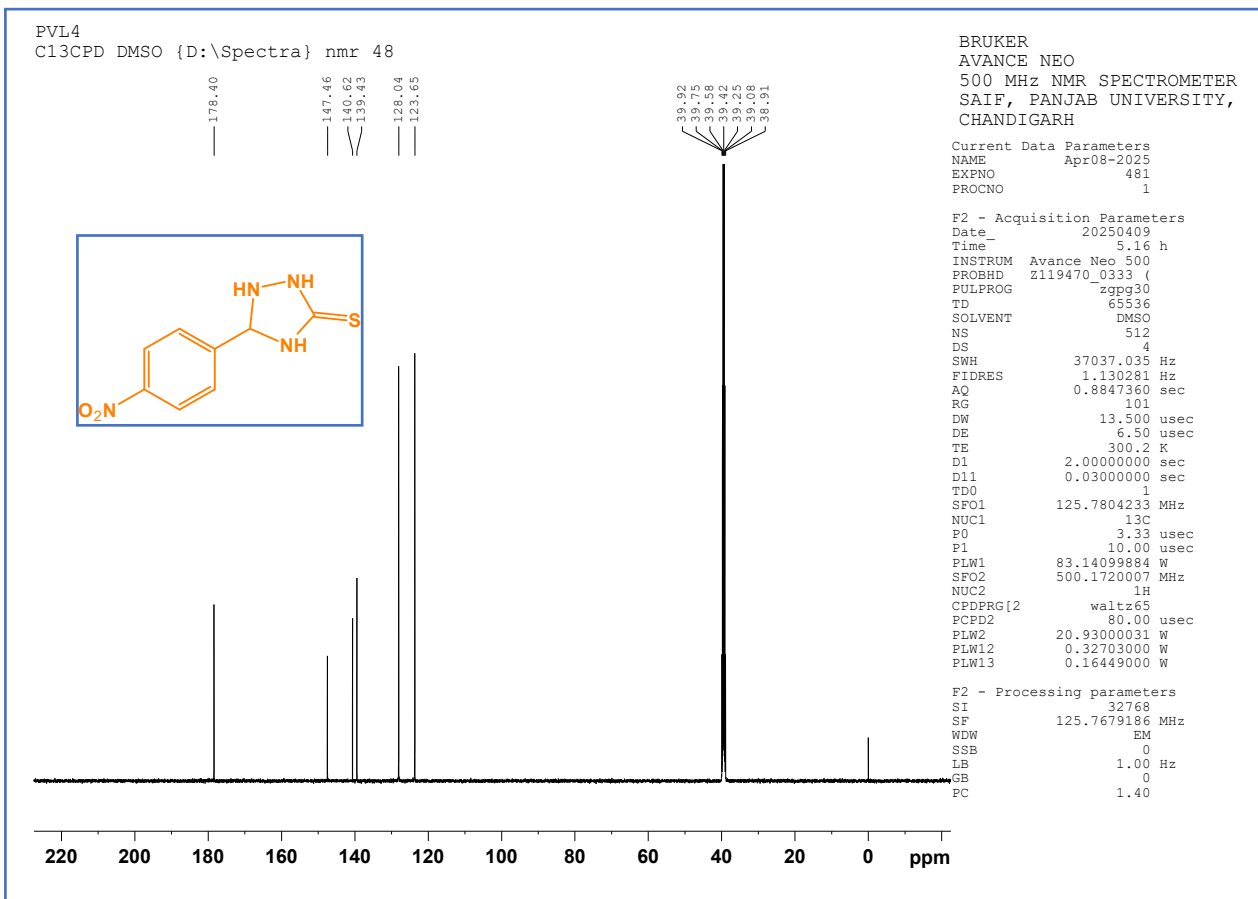

**<sup>13</sup>C-NMR of 5-(4-Nitrophenyl)-1,2,4-triazolidine-3-thione (3c)**

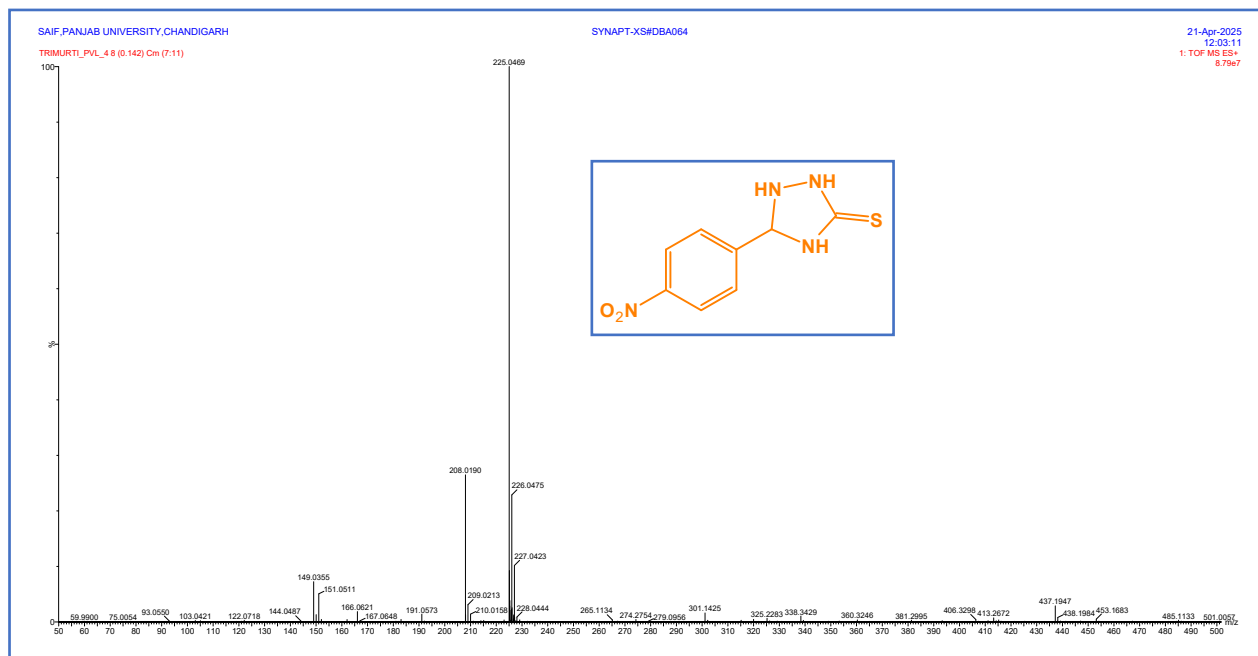

**HRMS of 5-(4-Nitrophenyl)-1,2,4-triazolidine-3-thione (3c)**

### 5-(2-Nitrophenyl)-1,2,4-triazolidine-3-thione (3d)

Yellow solid, Mp. 199-200 °C; IR (KBr):

3425,3107,3024,2970,1601,1515,1437,1331,1246,929,848,722,690,512 cm<sup>-1</sup>; <sup>1</sup>H-NMR (500 MHz, DMSO-d<sub>6</sub>): δ 7.6387-7.6725 (m, 1H,ArH, *J* = 17 Hz), 7.7550-7.7852 (t, 1H, ArH, *J* = 15 Hz), 8.0336-8.0522 (dd, 1H, *J* = 9.5 Hz), 8.1499 (s, 1H, NH), 8.4399-8.4582 (dd, 2H, *J* = 9.5 Hz), 8.5286 (s, 1H,NH), 11.7963 (s, 1H, NH); <sup>13</sup>C-NMR (500 MHz, DMSO-d<sub>6</sub>): 124.37, 128.23, 128.34, 130.21, 133.21, 137.25,148.11,178.43; HRMS {observed [M+1] peak: 225.04 (m/z)} {calculated [M] peak: 224.24 (m/z)}.

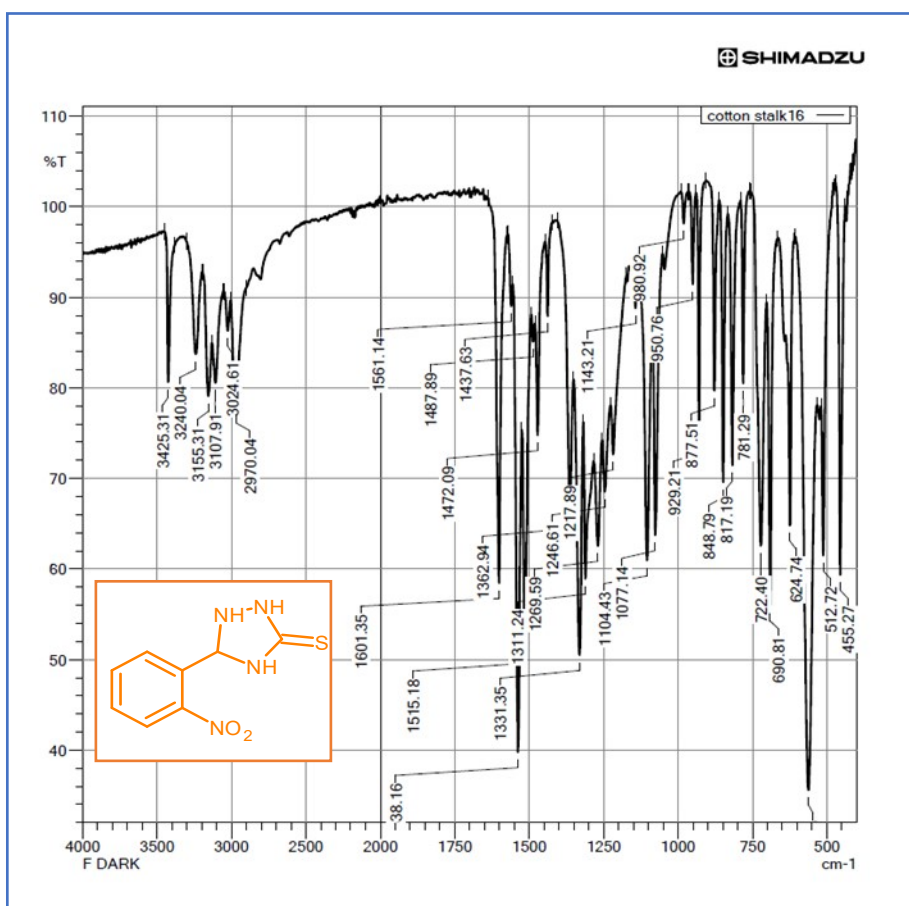

FTIR of 5-(2-Nitrophenyl)-1,2,4-triazolidine-3-thione (3d)

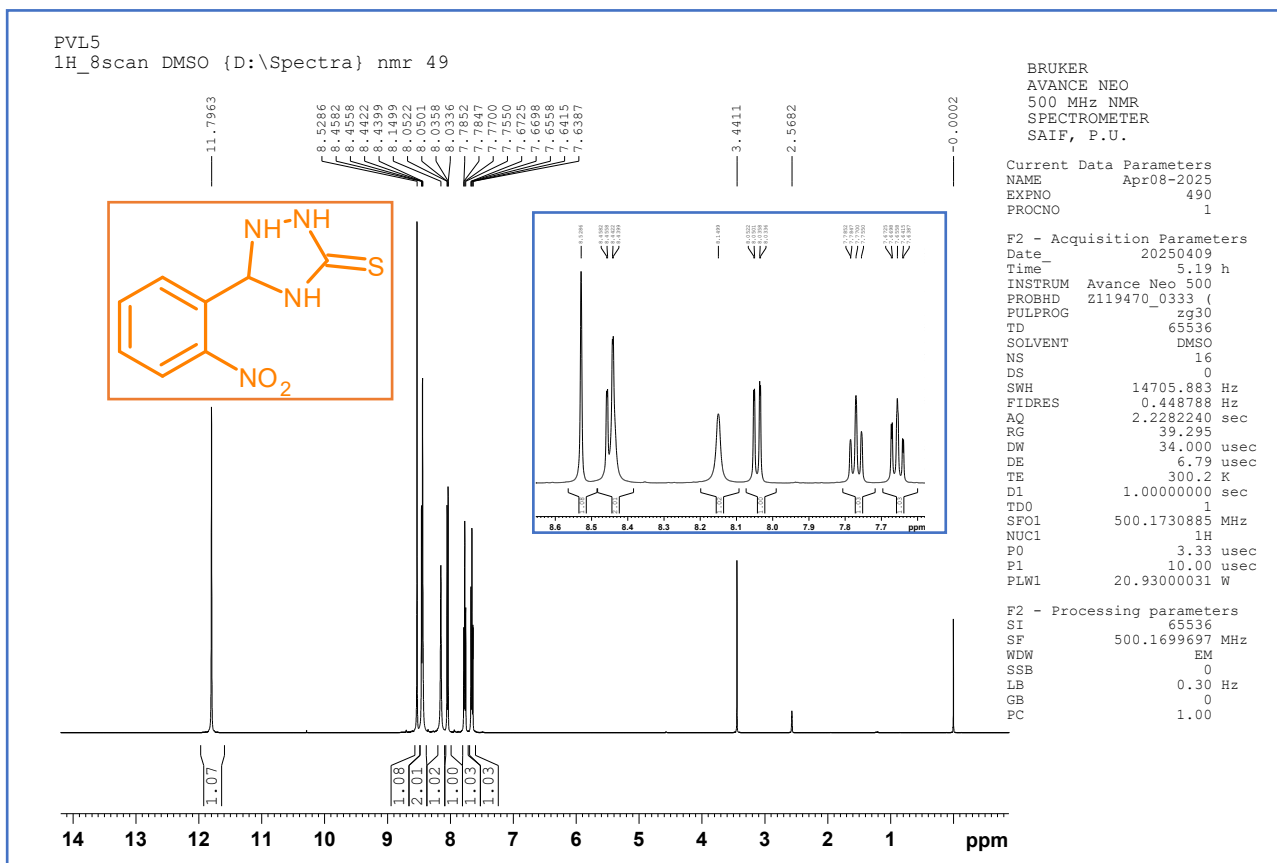

**<sup>1</sup>H NMR of 5-(2-Nitrophenyl)-1,2,4-triazolidine-3-thione (3d)**

PVL5  
C13CPD DMSO {D:\Spectra} nmr 49

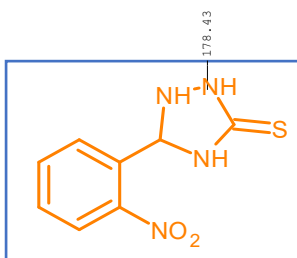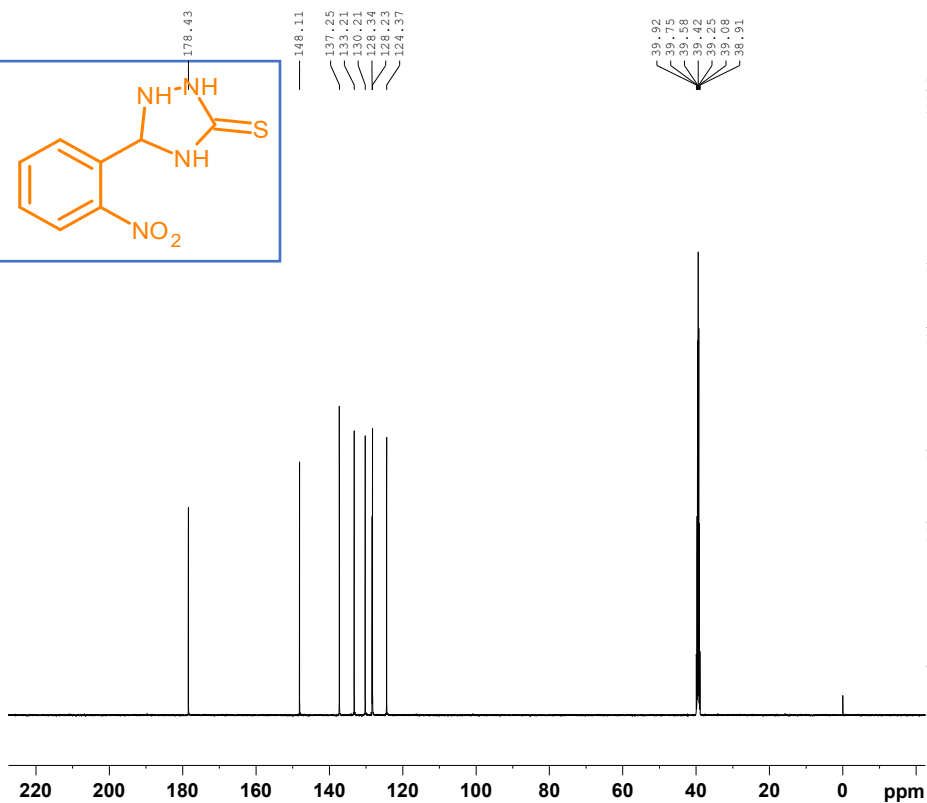

BRUKER  
AVANCE NEO  
500 MHz NMR SPECTROMETER  
SAIF, PANJAB UNIVERSITY,  
CHANDIGARH

Current Data Parameters  
NAME Apr08-2025  
EXNO 491  
PROCNO 1

F2 - Acquisition Parameters  
Date\_ 20250409  
Time\_ 5.44 h  
INSTRUM Avance Neo 500  
PROBHD Z119470\_0333 ( )  
FULPROG zgpg30  
TD 65536  
SOLVENT DMSO  
NS 512  
DS 4  
SWH 37037.035 Hz  
FIDRES 1.130281 Hz  
AQ 0.8847360 sec  
RG 101  
DW 13.500 usec  
DE 6.50 usec  
TE 300.2 K  
D1 2.0000000 sec  
D11 0.0300000 sec  
TD0 1  
SFO1 125.7804233 MHz  
NUC1 13C  
P0 3.33 usec  
P1 10.00 usec  
PLW1 83.14099884 W  
SFO2 500.1720007 MHz  
NUC2 1H  
CPDPRG[2] waltz65  
PCPD2 80.00 usec  
PLW2 20.93000031 W  
PLW12 0.32703000 W  
PLW13 0.16449000 W

F2 - Processing parameters  
SI 32768  
SF 125.7679129 MHz  
WDW EM  
SSB 0  
LB 1.00 Hz  
GB 0  
PC 1.40

<sup>13</sup>C-NMR of 5-(2-Nitrophenyl)-1,2,4-triazolidine-3-thione (3d)

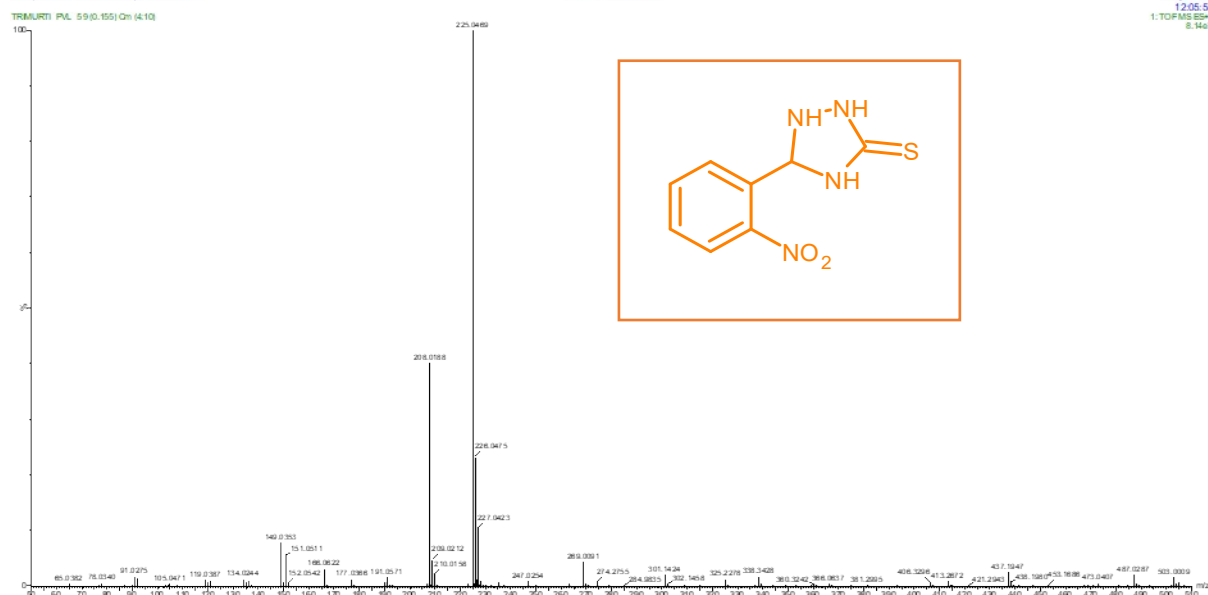

**HRMS of 5-(2-Nitrophenyl)-1,2,4-triazolidine-3-thione (3d)**

### 5-(4-Hydroxyphenyl)-1,2,4-triazolidine-3-thione (3e)

White crystal, Mp. 221-223 °C; IR (KBr): 3466, 3359, 3212, 2973, 1583, 1544, 1514, 1270, 1236, 1055, 827, 1048, 946, 870, 751, 608, 496  $\text{cm}^{-1}$ ;  $^1\text{H-NMR}$  (500 MHz, DMSO- $d_6$ ):  $\delta$  6.8475-6.8649 (d, 2H, ArH,  $J=8.5\text{Hz}$ ), 7.6601-7.6775 (d, 2H, ArH,  $J=8.5\text{Hz}$ ), 7.8931 (s, 1H, CH), 8.0511 (s, 1H, Ar-OH,), 8.1286 (s, 1H, NH), 9.9088 (s, 1H, NH), 11.3252 (s, 1H, NH);  $^{13}\text{C-NMR}$  (500 MHz, DMSO- $d_6$ ): 115.66, 125.14, 129.12, 143.00, 159.30, 177.46 ; HRMS {observed  $[\text{M}+1]$  peak: 196.05 (m/z)} {calculated  $[\text{M}]$  peak: 195.24 (m/z)}.

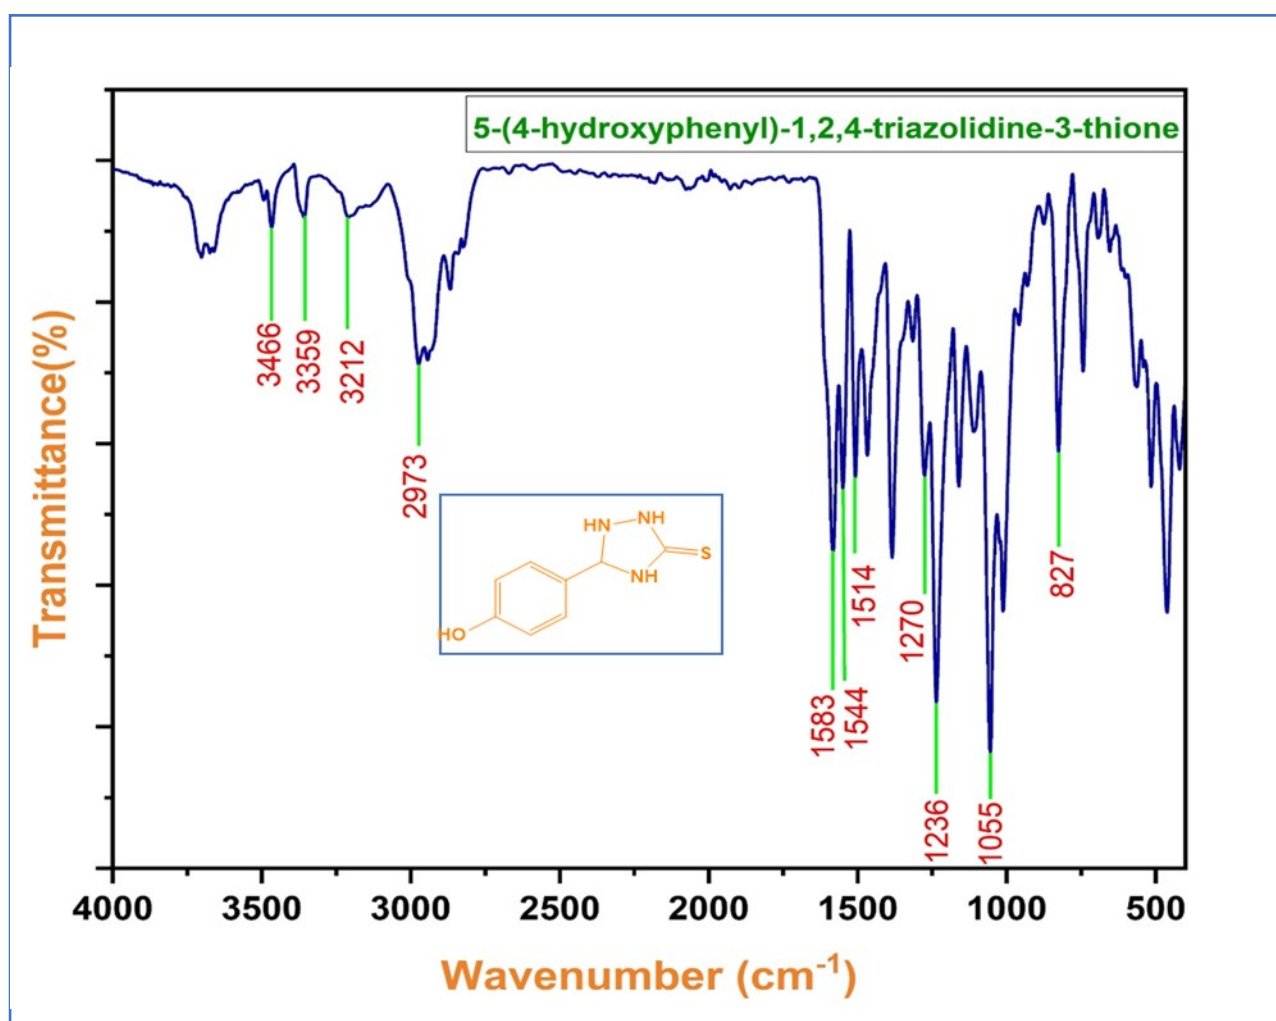

FTIR of 5-(4-Hydroxyphenyl)-1,2,4-triazolidine-3-thione (3e)

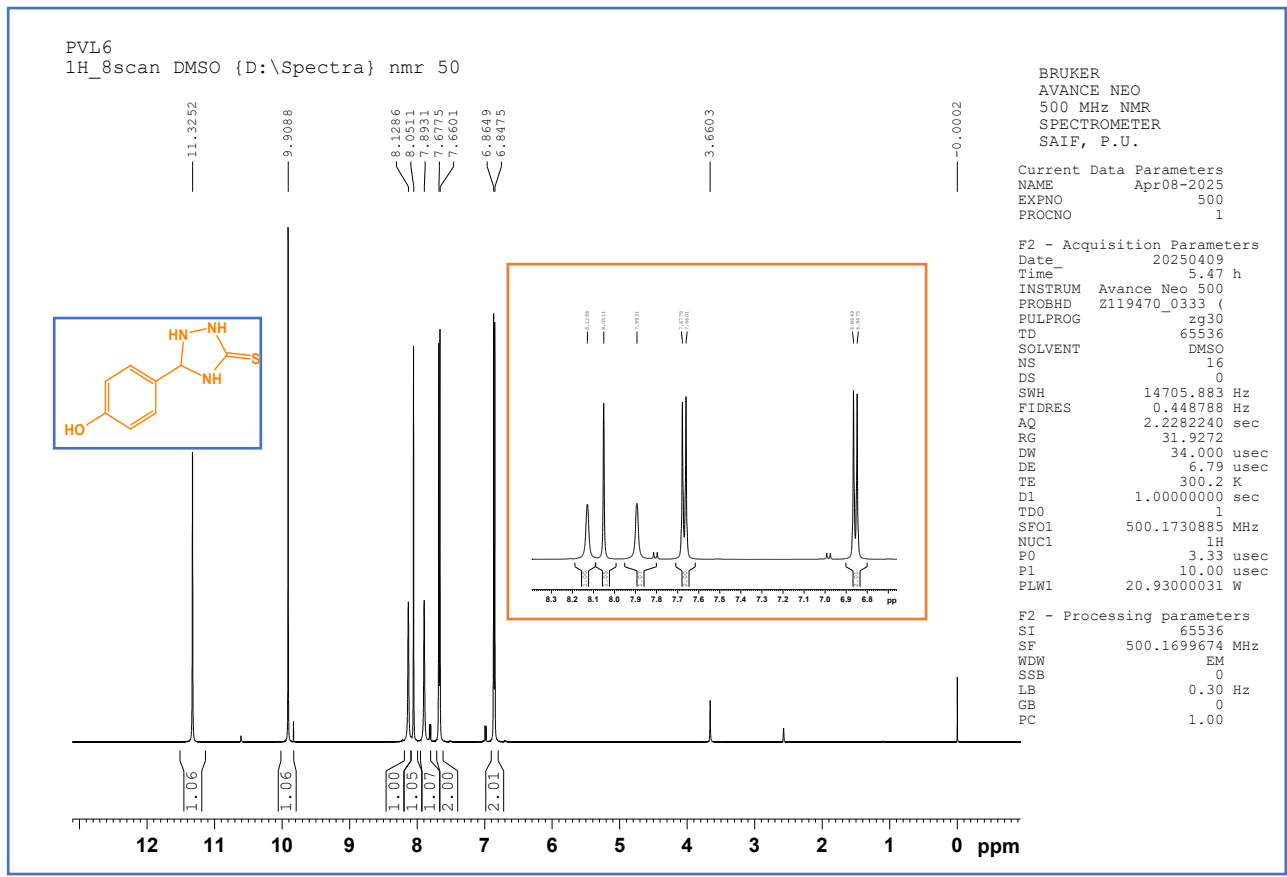

<sup>1</sup>H NMR of 5-(4-Hydroxyphenyl)-1,2,4-triazolidine-3-thione (3e)

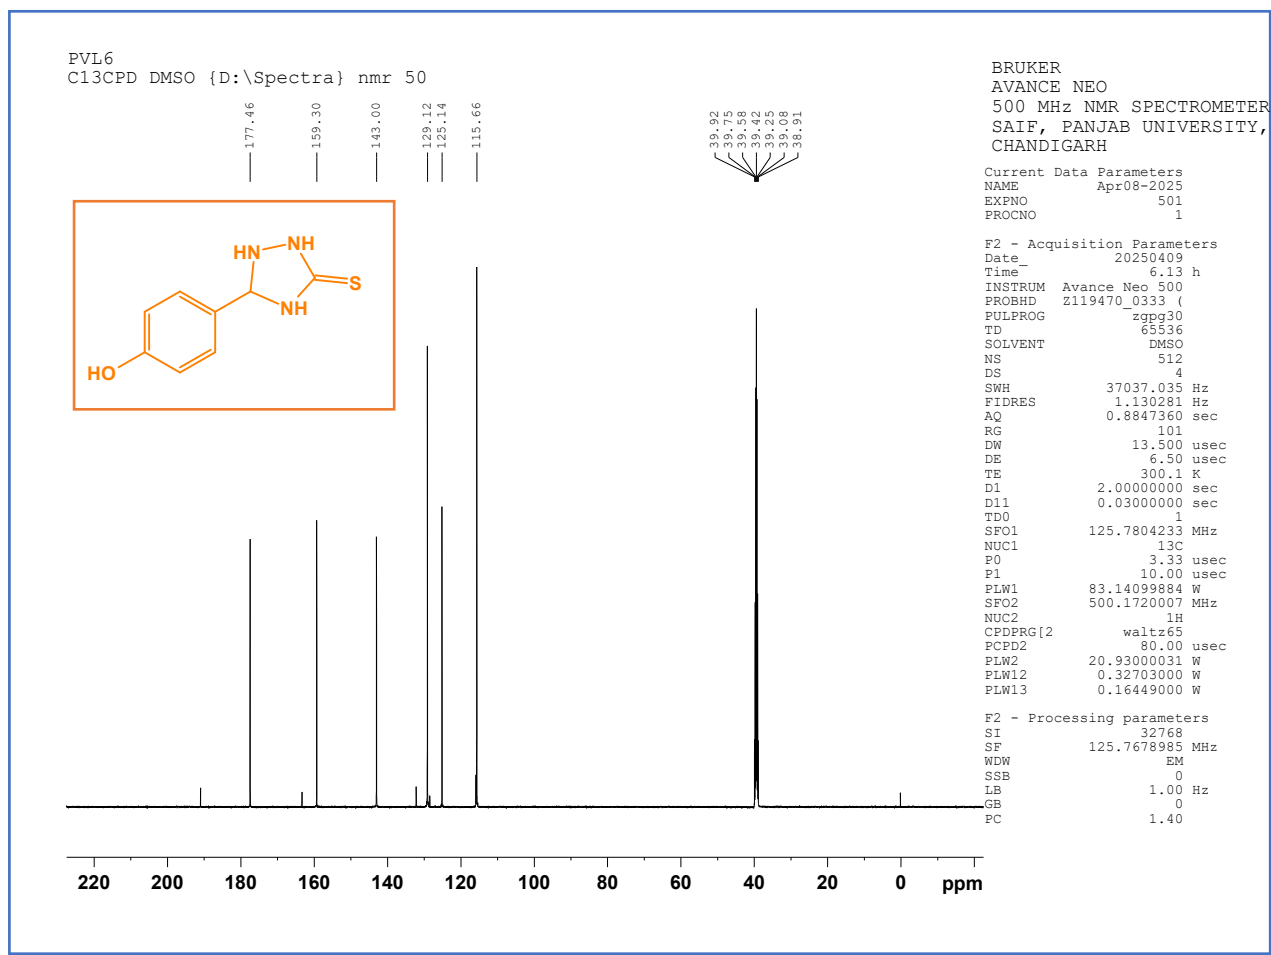

## $^{13}\text{C}$ -NMR of 5-(4-Hydroxyphenyl)-1,2,4-triazolidine-3-thione (3e)

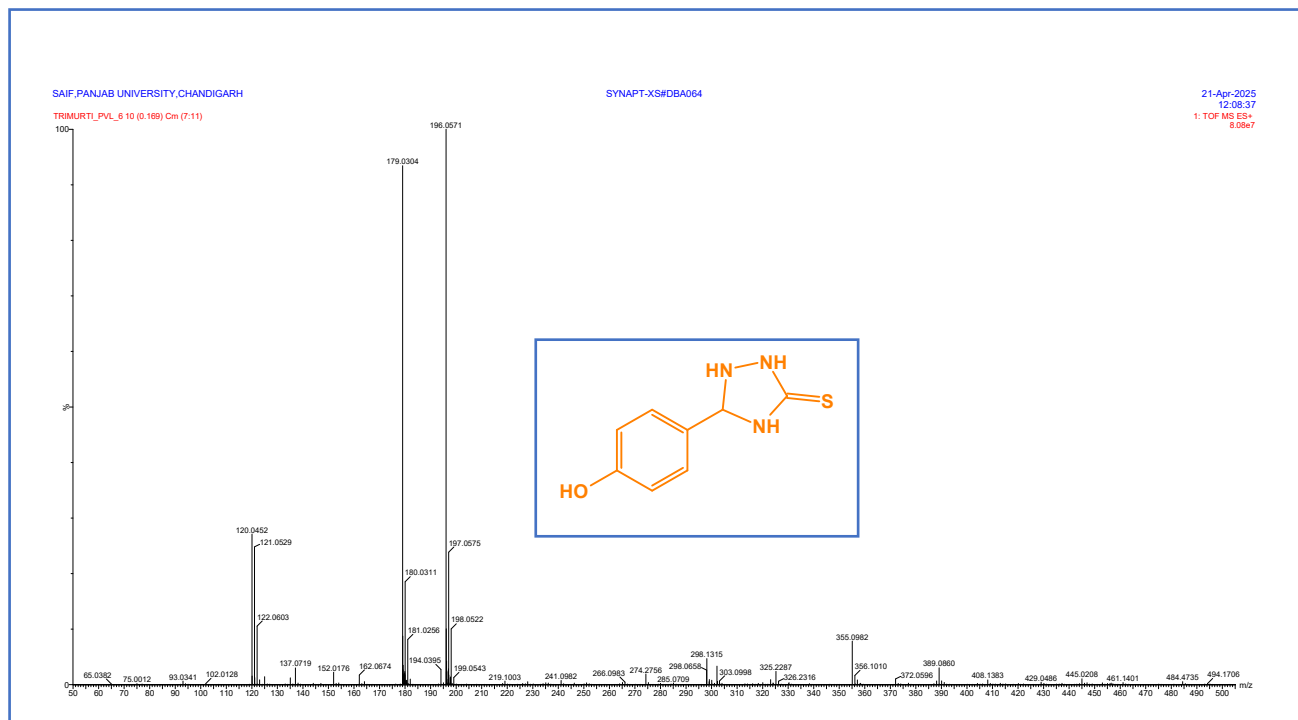

## HRMS of 5-(4-Hydroxyphenyl)-1,2,4-triazolidine-3-thione (3e)

### 5-(4-Methoxyphenyl)-1,2,4-triazolidine-3-thione (3f)

White crystal, Mp. 155-157 °C; IR (KBr):3396, 3287, 3138, 1598, 1534, 1358, 1236, 1167, 1082, 1012, 950, 812, 617, 512 cm<sup>-1</sup>; <sup>1</sup>H-NMR (500 MHz, DMSO-d<sub>6</sub>): δ 3.7972 (s, 3H, OCH<sub>3</sub>), 6.9565-6.9742 (d, 2H, ArH, J = 9 Hz), 7.7328-7.7505 (d, 2H, ArH, J = 9 Hz), 7.9109 (s, 1H, CH), 8.0138 (s, 1H, NH), 8.1116 (s, 1H, NH), 11.3201 (s, 1H, NH); <sup>13</sup>C-NMR (500 MHz, DMSO-d<sub>6</sub>): 55.2, 114.05, 126.63, 128.80, 142.15, 160.58, 177.52; HRMS {observed [M+1] peak: 210.07 (m/z)} {calculated [M] peak: 209.27 (m/z)}.

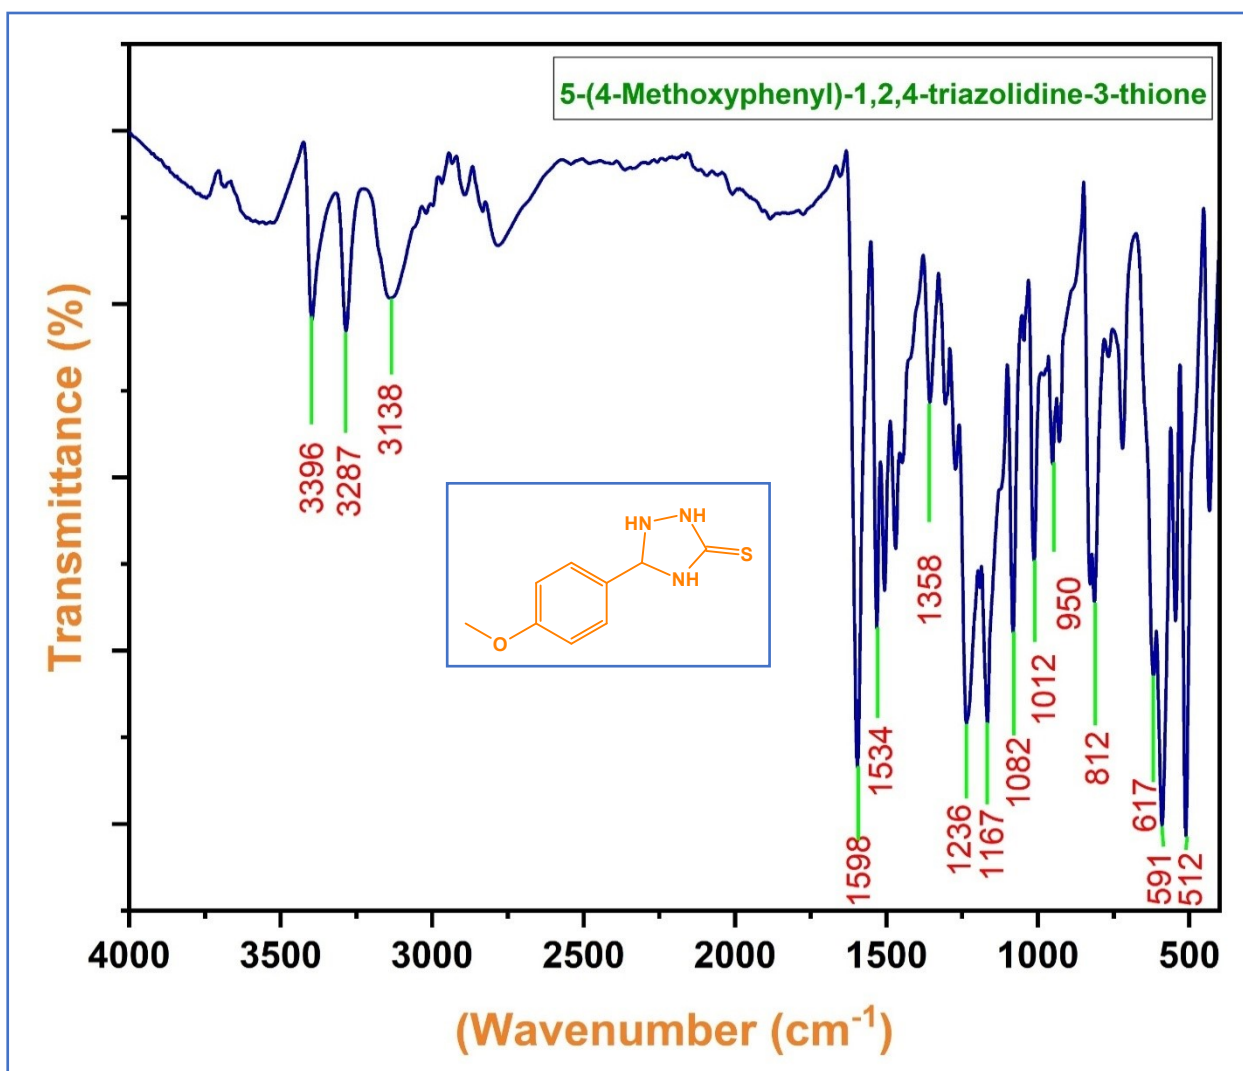

FTIR of 5-(4-Methoxyphenyl)-1,2,4-triazolidine-3-thione (3f)

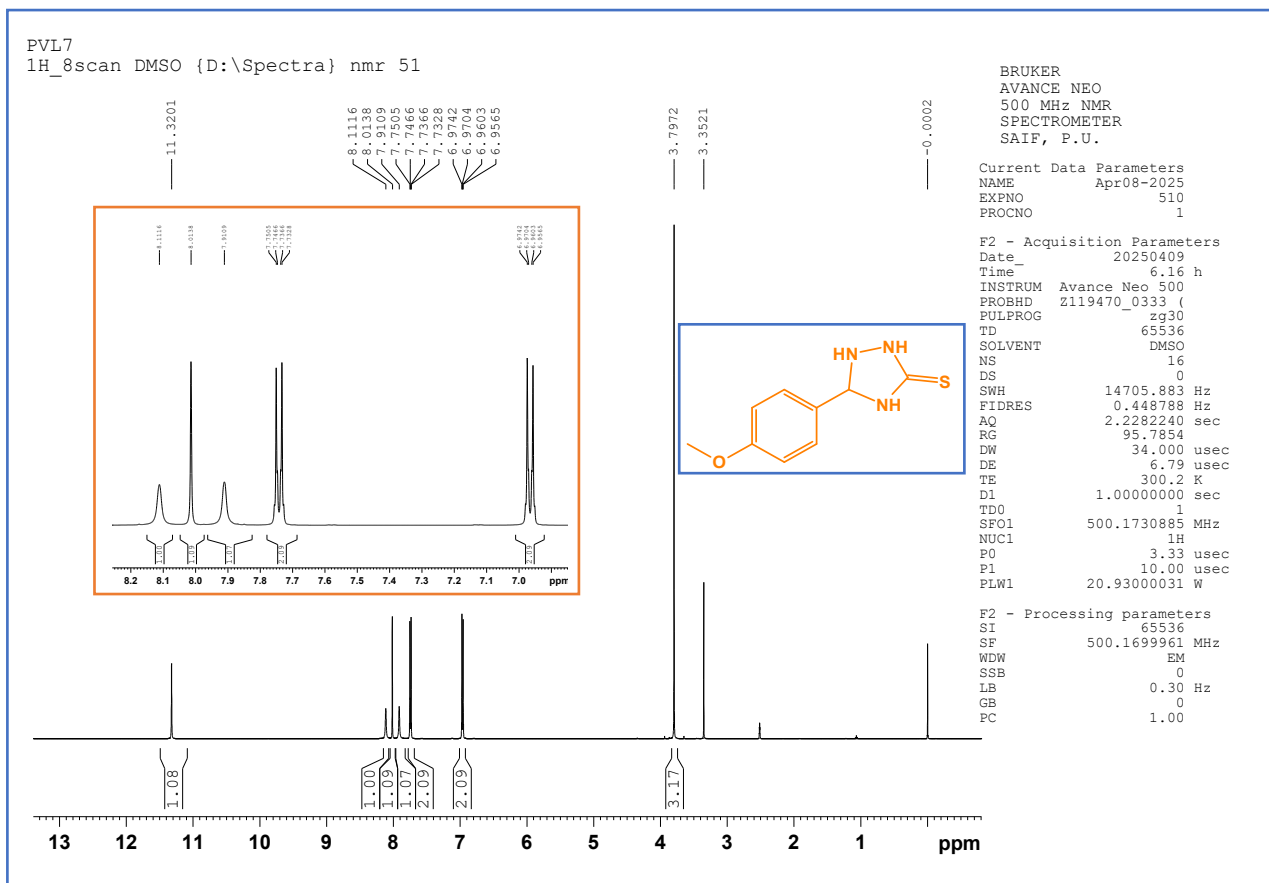

<sup>1</sup>H NMR of 5-(4-Methoxyphenyl)-1,2,4-triazolidine-3-thione (3f)

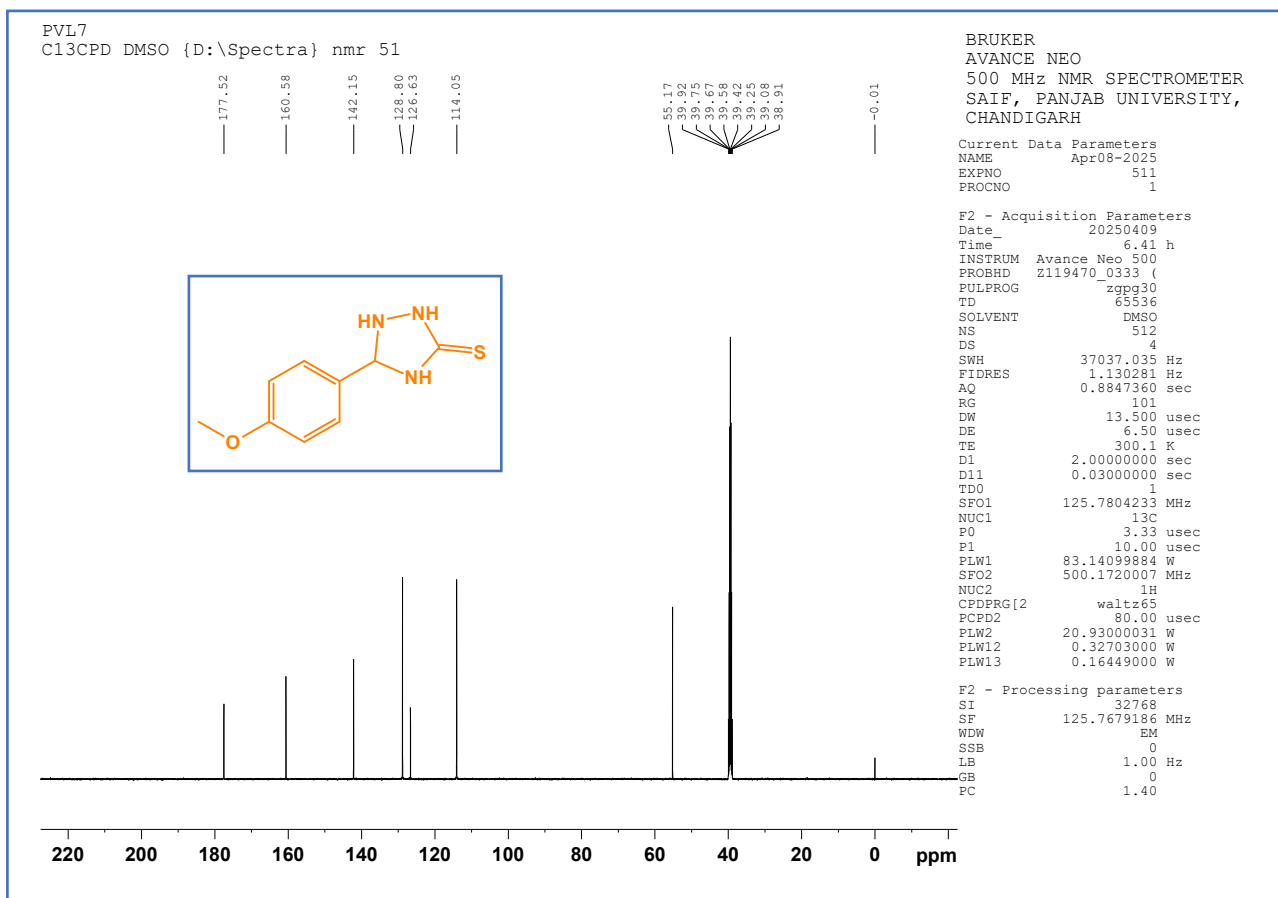

**<sup>13</sup>C-NMR of 5-(4-Methoxyphenyl)-1,2,4-triazolidine-3-thione (3f)**

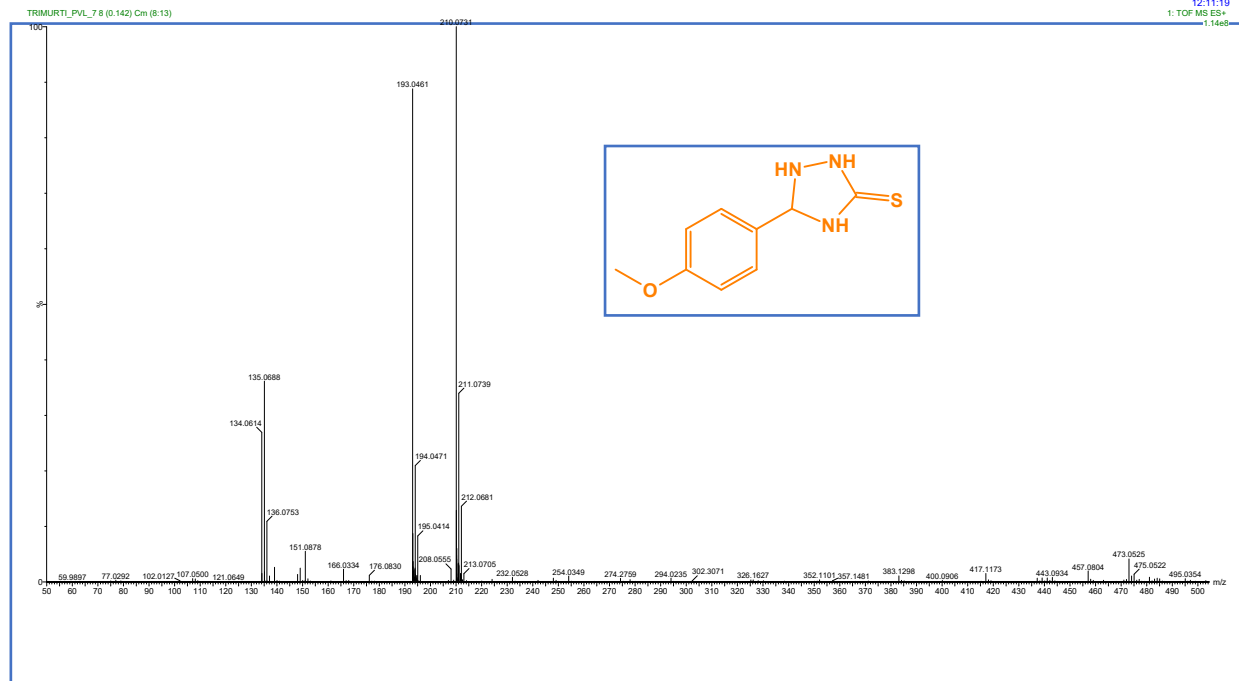

**HRMS of 5-(4-Methoxyphenyl)-1,2,4-triazolidine-3-thione (3f)**

### 5-(4-Chlorophenyl)-1,2,4-triazolidine-3-thione (3g)

White crystal, Mp. 206-208 °C; IR (KBr): 3433, 3264, 3158, 1593, 1509, 1466, 1362, 1279, 1236, 1157, 1058, 990, 924, 874, 693, 551  $\text{cm}^{-1}$ ;  $^1\text{H-NMR}$  (500 MHz, DMSO- $d_6$ ):  $\delta$  7.4497-7.4759 (d, 2H, ArH,  $J = 13$  Hz), 7.8354-7.8618 (d, 2H, ArH,  $J = 13$  Hz), 8.0461 (s, 1H, CH), 8.0757 (s, 1H, NH), 8.2427 (s, 1H, NH), 11.4907 (s, 1H, NH).  $^{13}\text{C-NMR}$  (500 MHz, DMSO $d_6$ ): 128.57, 128.82, 133.08, 134.12, 140.74, 177.99; HRMS {observed  $[\text{M}+1]$  peak: 214.02 (m/z)} {calculated  $[\text{M}]$  peak: 213.69 (m/z)}.

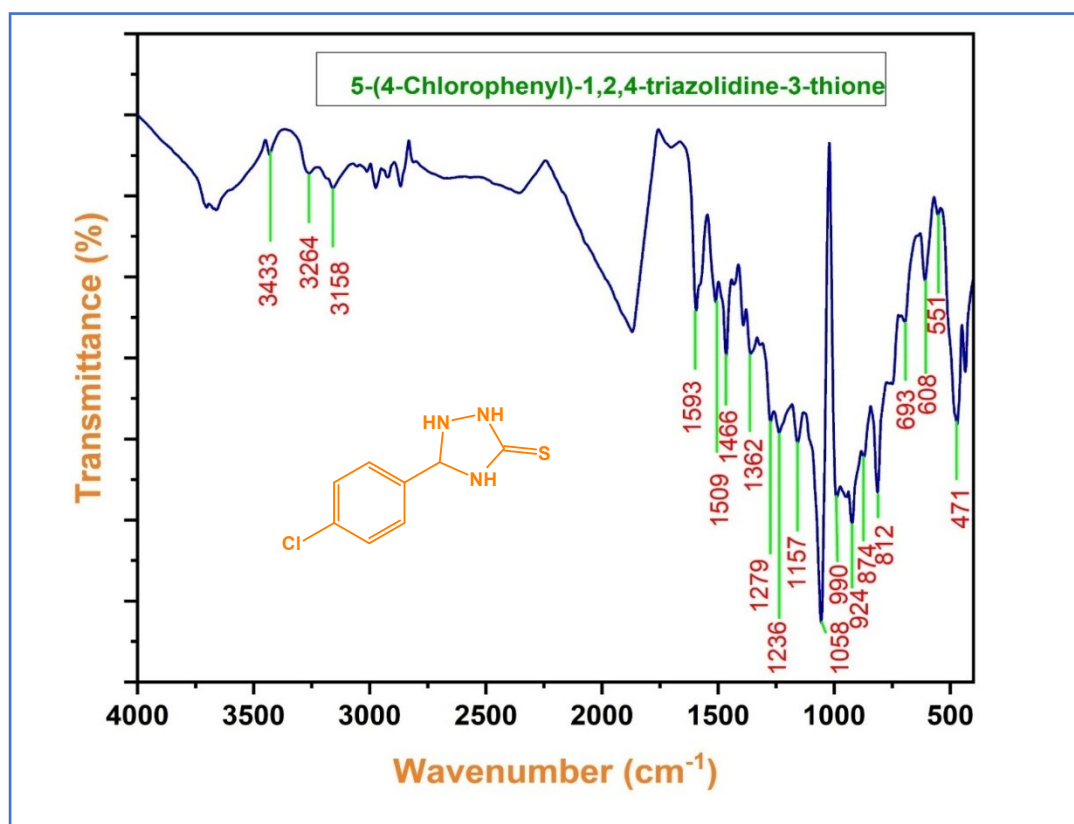

FTIR of 5-(4-Chlorophenyl)-1,2,4-triazolidine-3-thione (3g)

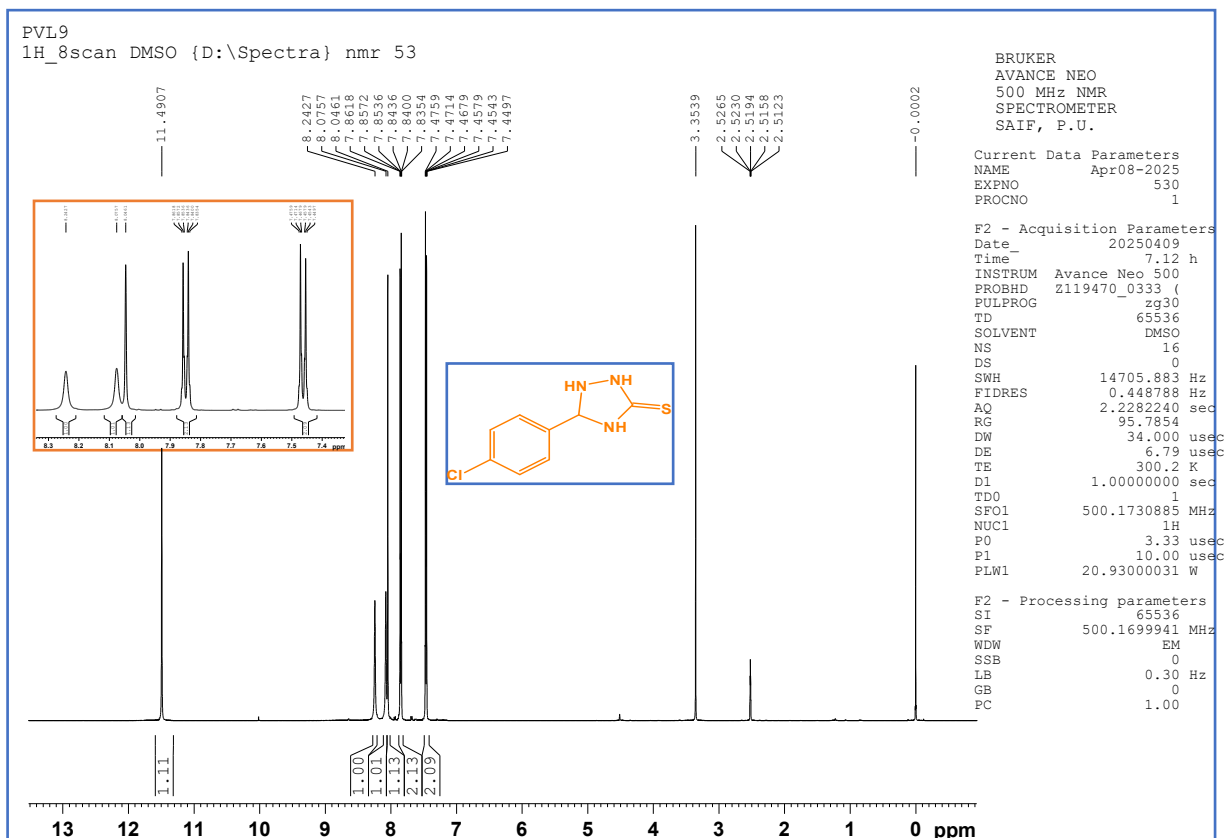

**<sup>1</sup>H NMR of 5-(4-Chlorophenyl)-1,2,4-triazolidine-3-thione (3g)**

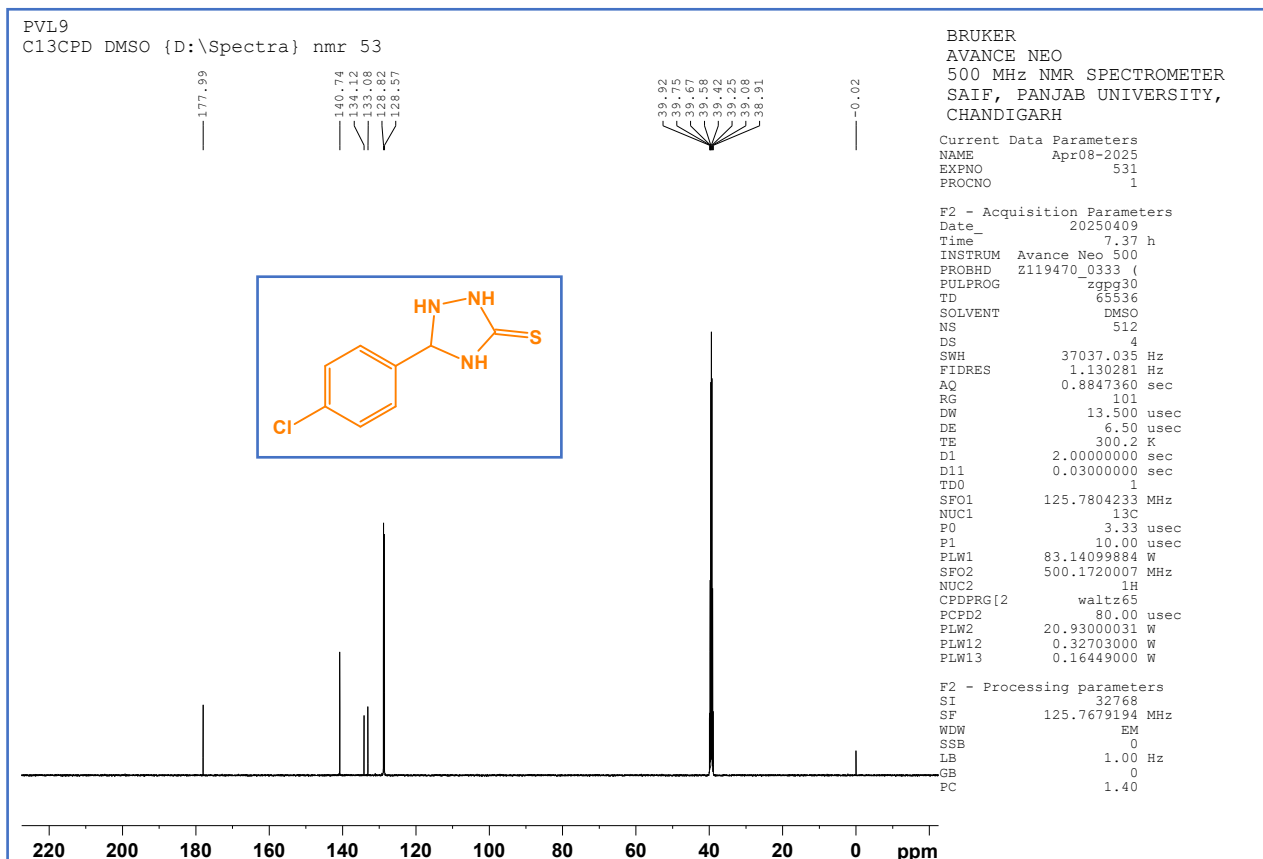

**<sup>13</sup>C-NMR of 5-(4-Chlorophenyl)-1,2,4-triazolidine-3-thione (3g)**

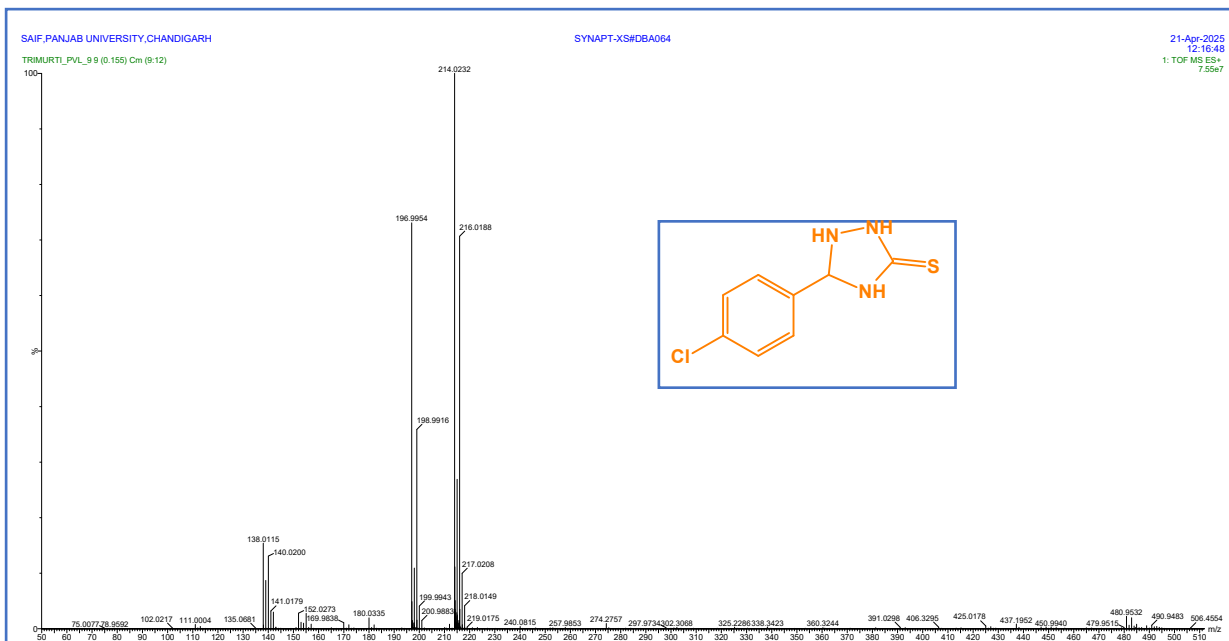

**HRMS of 5-(4-Chlorophenyl)-1,2,4-triazolidine-3-thione (3g)**

### 5-(2-Hydroxyphenyl)-1,2,4-triazolidine-3-thione (3h)

White crystal, Mp. 217-219°C; IR (KBr): 3439, 3314, 3170, 2982, 1601, 1533, 1489, 1365, 1263, 1213, 1110, 1058, 947, 828, 748, 616, 521 cm<sup>-1</sup>; <sup>1</sup>H-NMR (500 MHz, DMSO-d<sub>6</sub>): δ 6.8121-6.8420 (t, 1H, ArH, J = 15 Hz), 6.8719-6.8895 (d, 1H, ArH, J = 9 Hz), 7.2064-7.2406 (m, 1H, ArH, J = 7.5Hz), 7.9124-7.9270 (d, 2H, J = 7.5Hz), 8.1090 (s, 1H, CH), 8.11 (s, 1H, NH), 8.3944 (s, 1H, NH), 9.8735 (s, 1H, OH), 11.3820 (s, 1H, NH); <sup>13</sup>C-NMR (500 MHz, DMSO-d<sub>6</sub>): 115.96, 119.19, 120.24, 126.68, 131.01, 139.62, 156.32, 177.58; HRMS {observed [M+1] peak: 196.03 (m/z)} {calculated [M] peak: 195.24 (m/z)}.

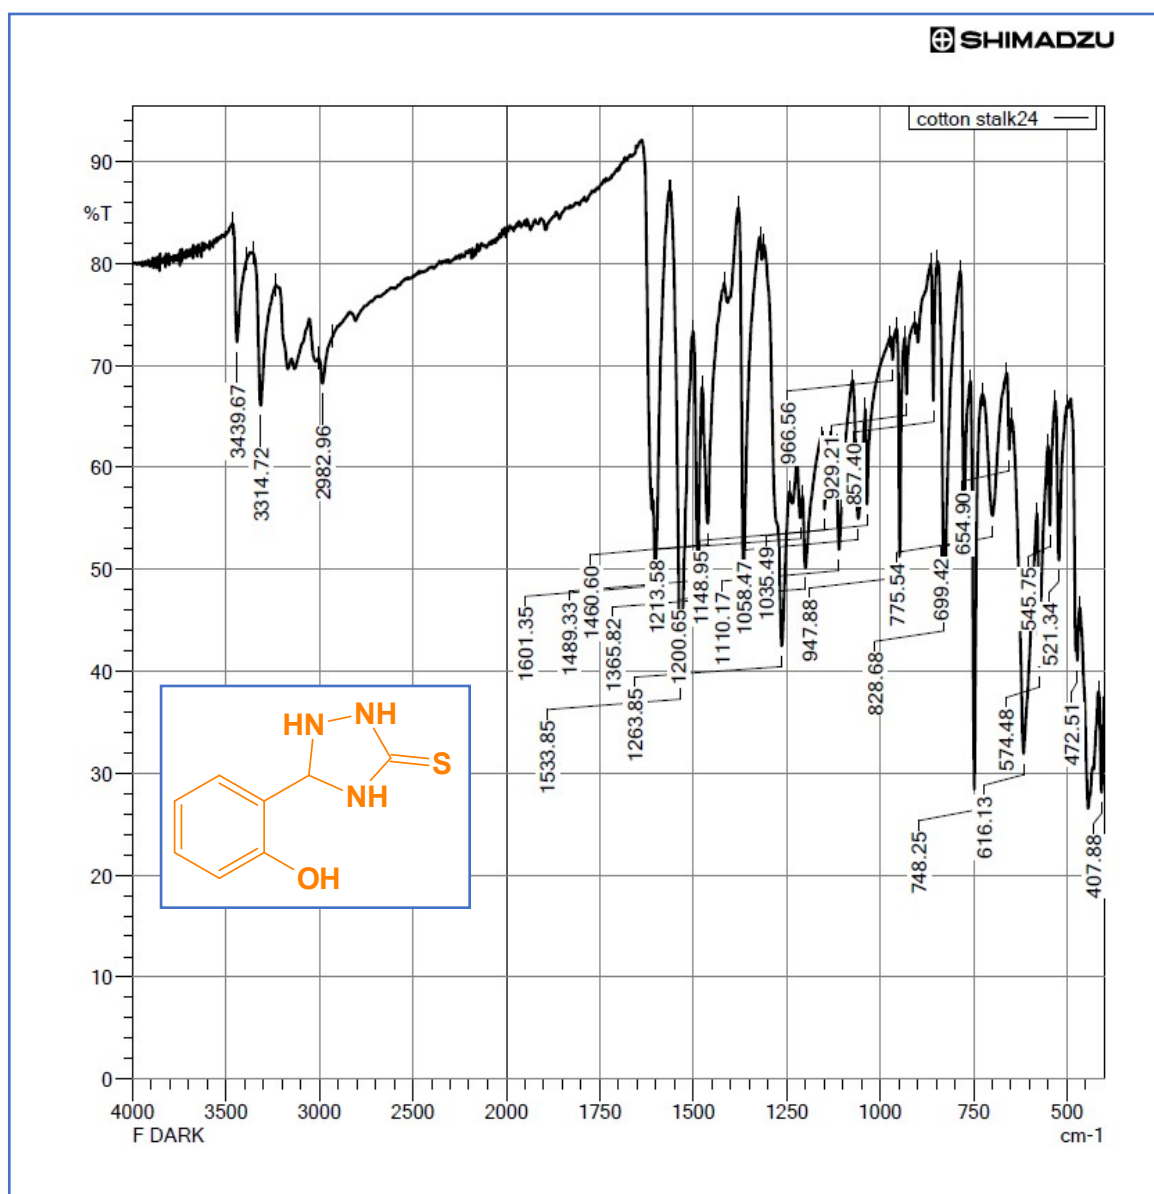

### FTIR of 5-(2-Hydroxyphenyl)-1,2,4-triazolidine-3-thione (3h)

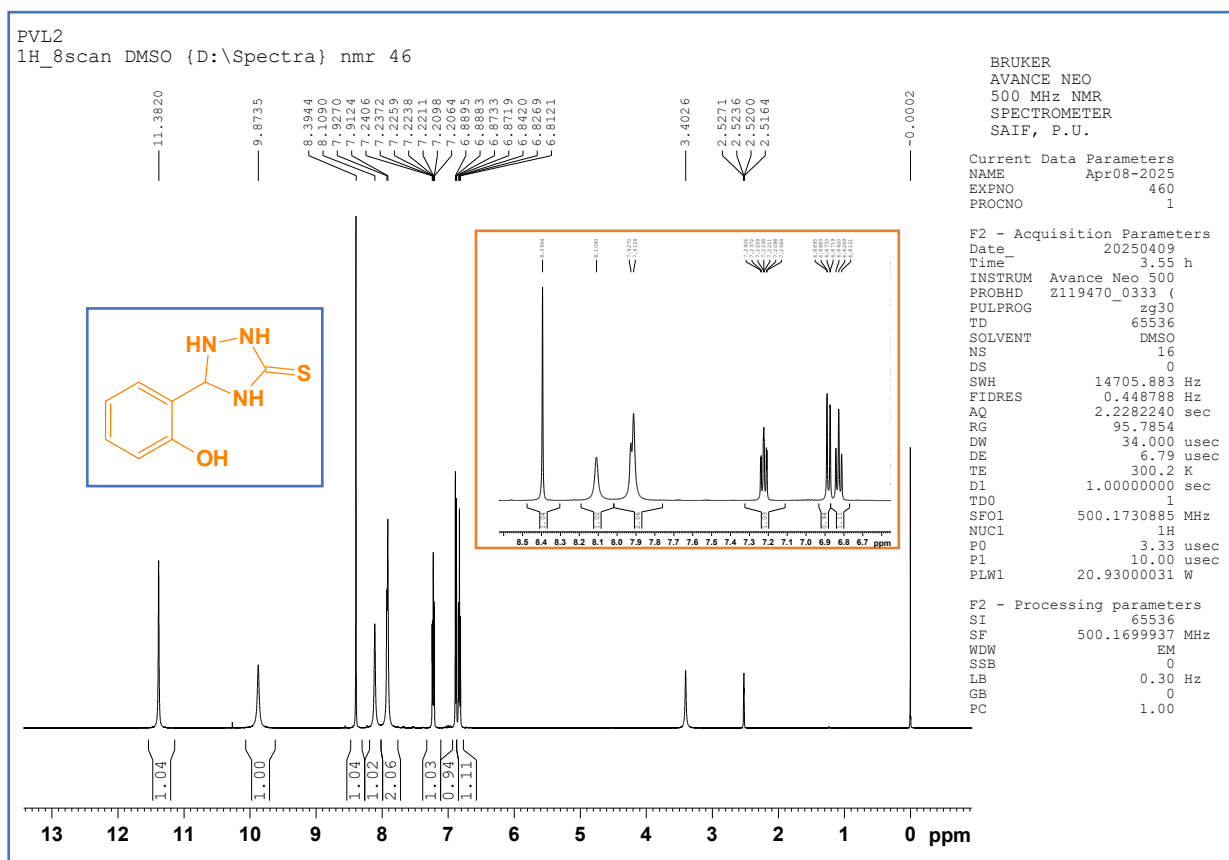

### <sup>1</sup>H NMR of 5-(2-Hydroxyphenyl)-1,2,4-triazolidine-3-thione (3h)

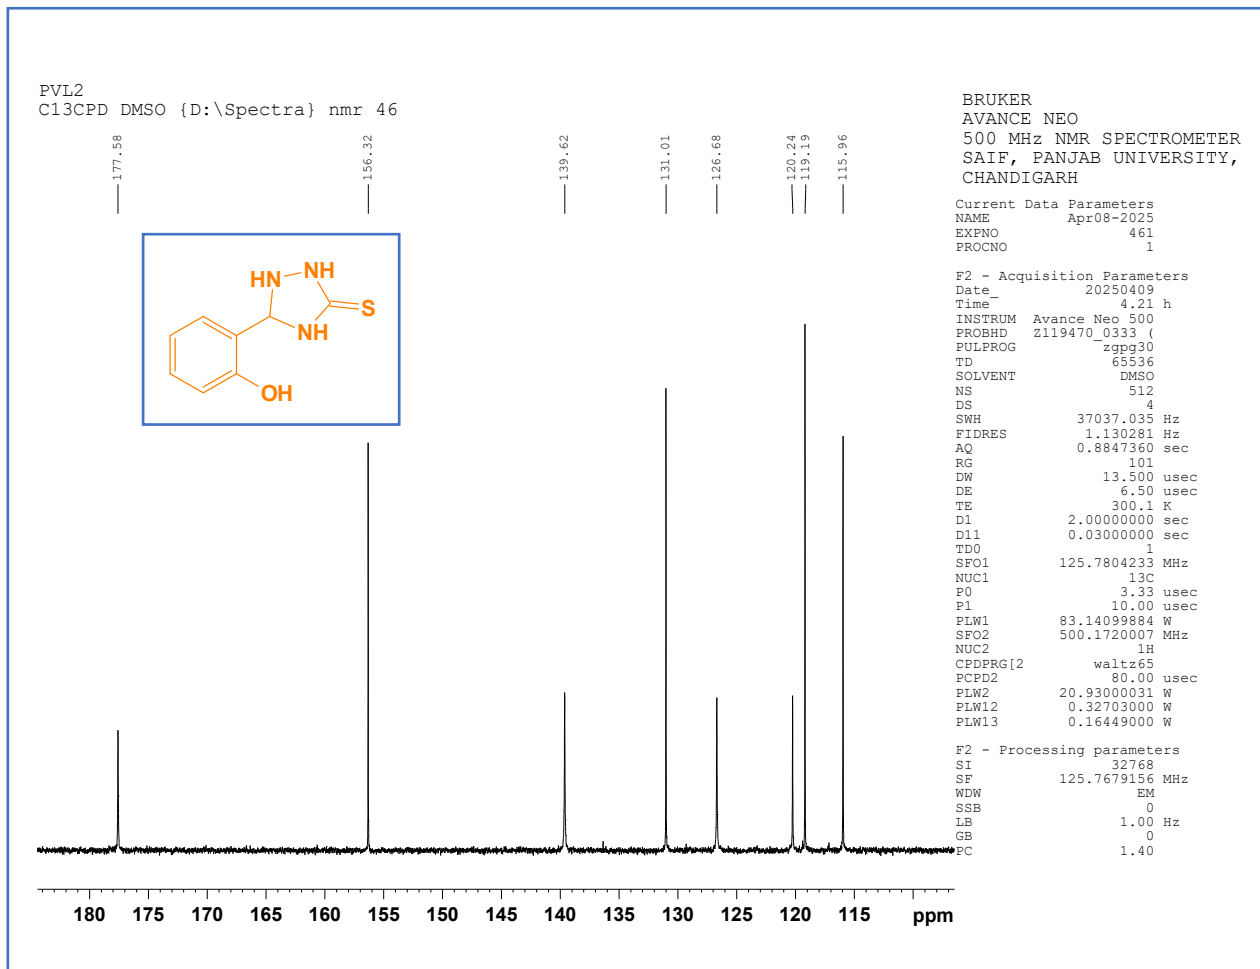

**<sup>13</sup>C-NMR of 5-(2-Hydroxyphenyl)-1,2,4-triazolidine-3-thione (3h)**

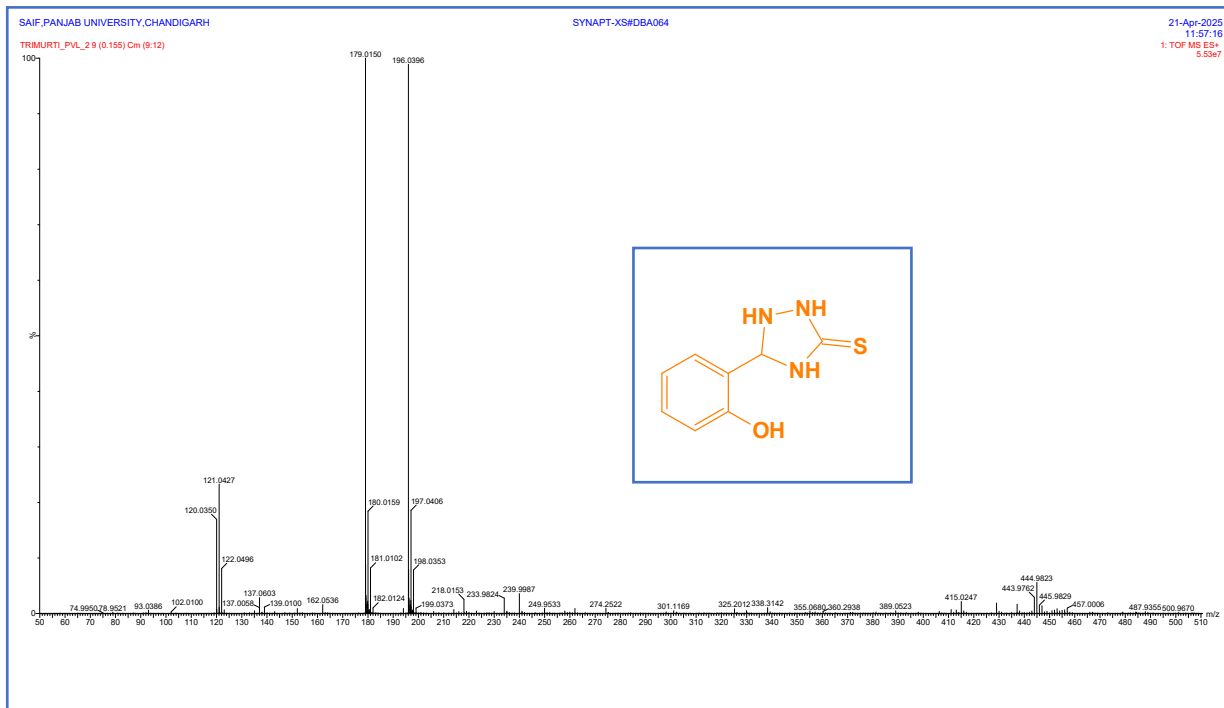

**HRMS of 5-(2-Hydroxyphenyl)-1,2,4-triazolidine-3-thione (3h)**

### 5-(3,4-dimethoxyphenyl)-1,2,4-triazolidine-3-thione (3i)

White Crystalline solid; M.P. 221-223°C; IR (KBr): 3347, 3260, 3181, 2959, 1617, 1532, 1462, 1365, 1266, 1200, 1160, 1054, 952, 837, 752, 654, 538  $\text{cm}^{-1}$ ;  $^1\text{H-NMR}$  (500 MHz, DMSO- $d_6$ ):  $\delta$  3.8211 (s, 3H,  $\text{OCH}_3$ ), 3.8576-3.8634 (s, 3H,  $J = 3\text{Hz}$ ) 6.976-6.992 (d, 1H,  $J = 8\text{Hz}$ ) 7.200-7.221 (dd, 1H,  $J = 10.5\text{Hz}$ ), 7.546-7.550 (d, 1H,  $J = 2\text{Hz}$ ), 8.060 (s, 1H), 8.079 (s, 1H), 8.180 (s, 1H), 11.363 (s, 1H);  $^{13}\text{C-NMR}$  (500 MHz, DMSO- $d_6$ ):; HRMS {observed  $[\text{M}+1]$  peak: 240.08 (m/z)} {calculated  $[\text{M}]$  peak: 239.29 (m/z)}

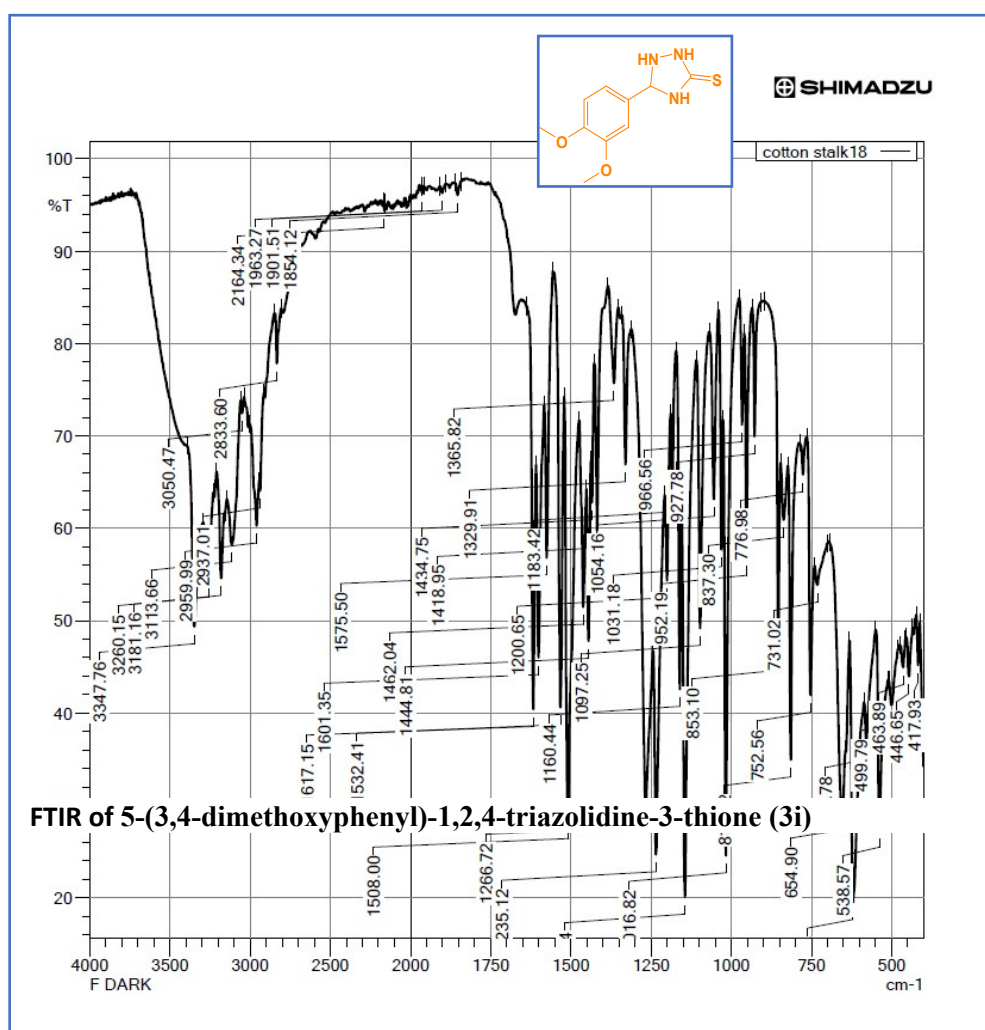

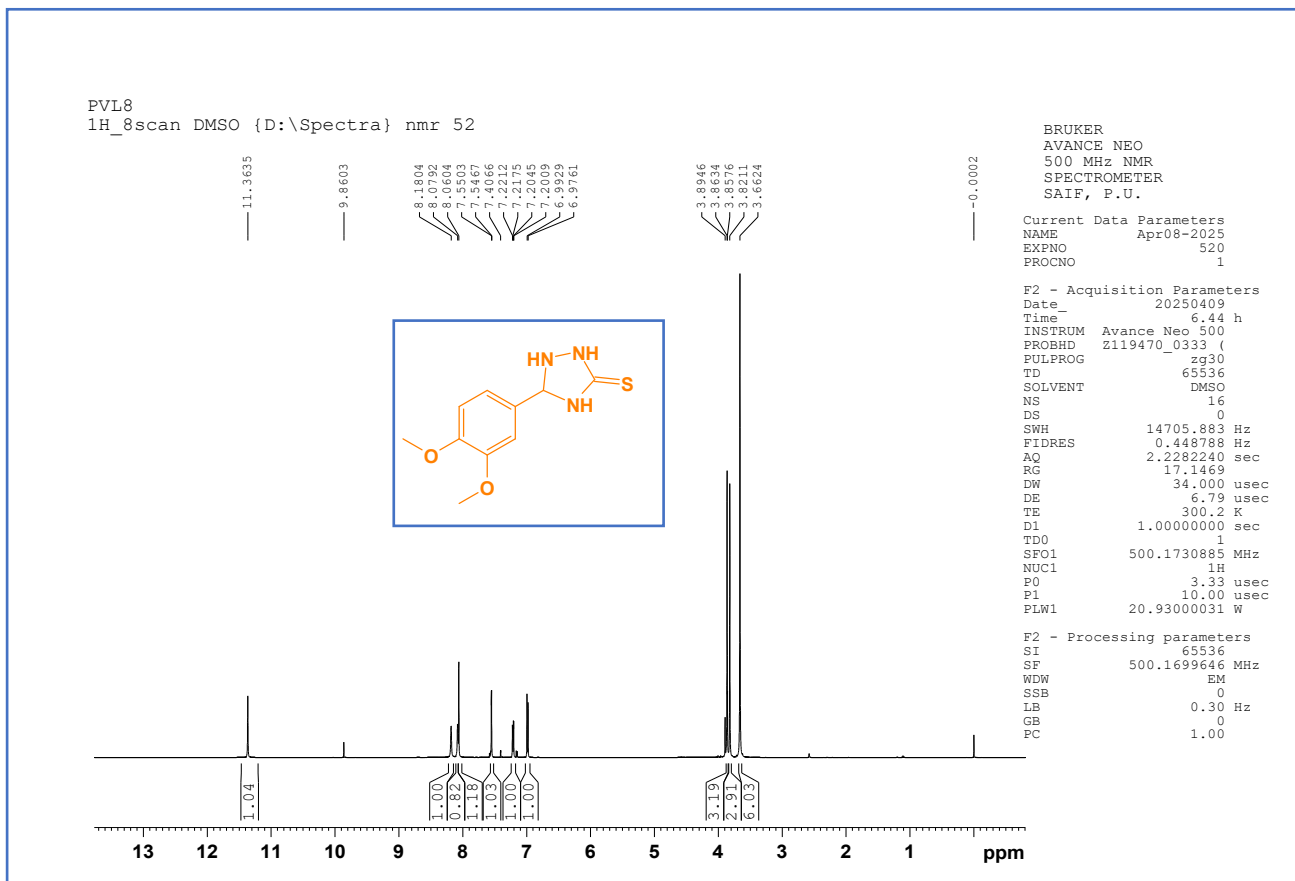

**<sup>1</sup>H NMR of 5-(3,4-dimethoxyphenyl)-1,2,4-triazolidine-3-thione (3i)**

PVL8  
C13CPD DMSO {D:\Spectra} nmr 52

191.55  
177.65

154.30  
150.77  
149.23  
143.03

129.70  
126.02  
122.33  
111.35

111.28  
109.53  
108.66

55.95  
55.80  
55.62

39.75  
39.58  
39.42  
39.25  
39.08  
38.91

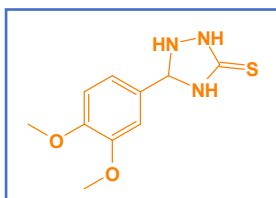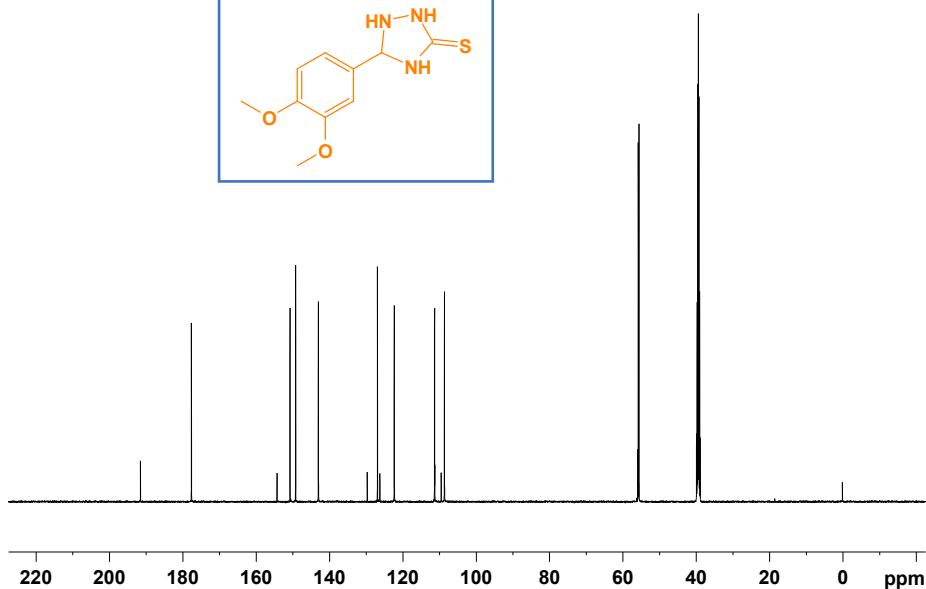

BRUKER  
AVANCE NEO  
500 MHz NMR SPECTROMETER  
SAIF, PANJAB UNIVERSITY,  
CHANDIGARH

Current Data Parameters  
NAME Apr08-2025  
EXPNO 521  
PROCNO 1

F2 - Acquisition Parameters  
Date\_ 20250409  
Time\_ 7.09 h  
INSTRUM Avance Neo 500  
PROBHD Z119470\_0333 (  
PULPROG zgpg30  
TD 65536  
SOLVENT DMSO  
NS 512  
DS 4  
SWH 37037.035 Hz  
FIDRES 1.130281 Hz  
AQ 0.8847360 sec  
RG 101  
DW 13.500 usec  
DE 6.50 usec  
TE 300.2 K  
D1 2.0000000 sec  
D11 0.0300000 sec  
TD0 1  
SF01 125.7804233 MHz  
NUC1 13C  
P0 3.33 usec  
P1 10.00 usec  
PLW1 83.14099884 W  
SFO2 500.1720007 MHz  
NUC2 1H  
CPDPRG2 waltz65  
PCPD2 80.00 usec  
PLW2 20.93000031 W  
PLW12 0.32703000 W  
PLW13 0.16449000 W

F2 - Processing parameters  
SI 32768  
SF 125.7678850 MHz  
WDW EM  
SSB 0  
LB 1.00 Hz  
GB 0  
PC 1.40

**<sup>13</sup>C-NMR of 5-(3,4-dimethoxyphenyl)-1,2,4-triazolidine-3-thione (3i)**

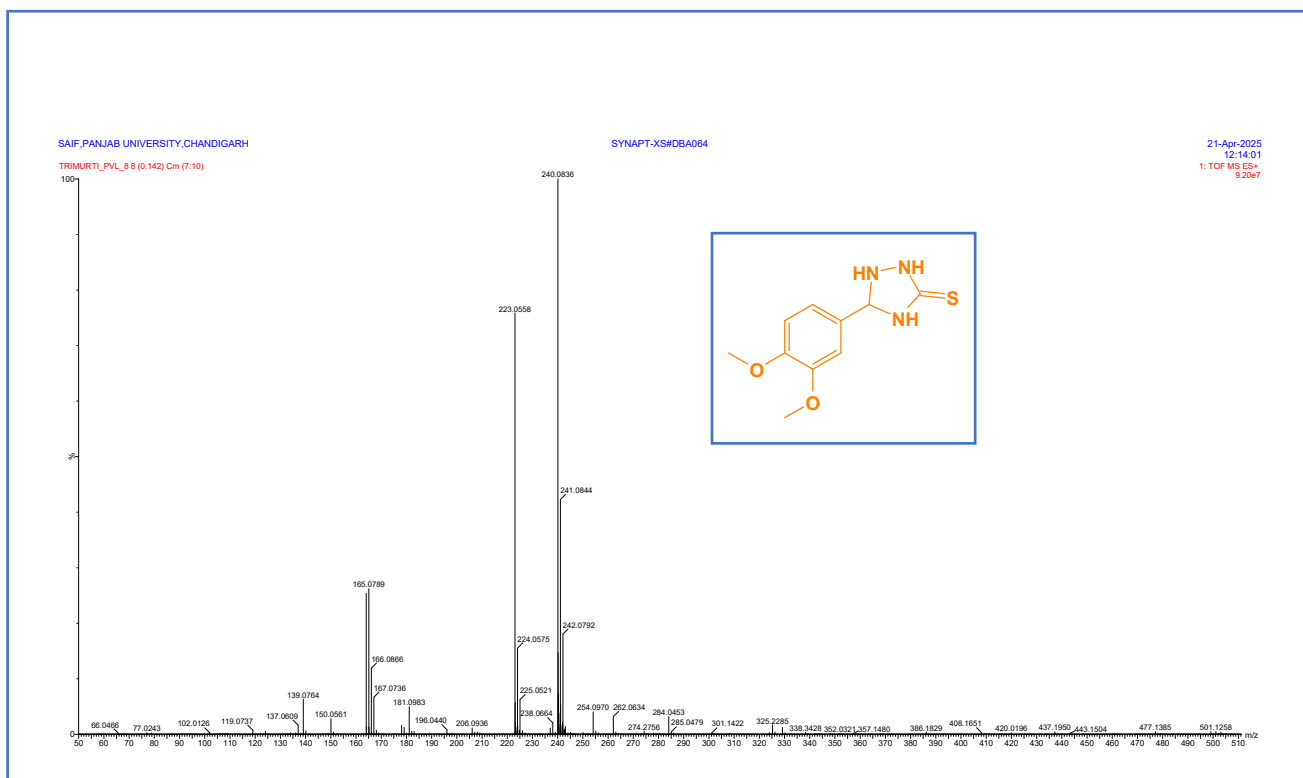

**HRMS of 5-(3,4-dimethoxyphenyl)-1,2,4-triazolidine-3-thione (3i)**

### 5-(thiophen-2-yl)-1,2,4-triazolidine-3-thione (3j)

Yellow solid; M.pt. 219-221°C ; IR (KBr): 3359, 3231, 3123, 2942, 1655, 1568, 1464, 1426, 1388, 1237, 1077, 1020, 837, 739 $\text{cm}^{-1}$   $^1\text{H}$ -NMR (500 MHz, DMSO- $d_6$ ):  $\delta$  7.1081-7.1255 (m, 1H,  $J = 8.5\text{Hz}$ ), 7.4481-7.4569 (d, 1H,  $J = 4\text{Hz}$ ), 7.5641 (s, 1H), 7.6421-7.6521 (d, 1H,  $J = 5\text{Hz}$ ), 8.2127 (s, 1H), 8.2693 (s, 1H), 11.4624 (s, 1H);  $^{13}\text{C}$ -NMR (500 MHz, DMSO- $d_6$ ): 127.83, 128.74, 130.46, 137.54, 138.51, 177.46 ; HRMS {observed  $[\text{M}+1]$  peak: 186.01 (m/z)} {calculated  $[\text{M}]$  peak: 185.27 (m/z)}

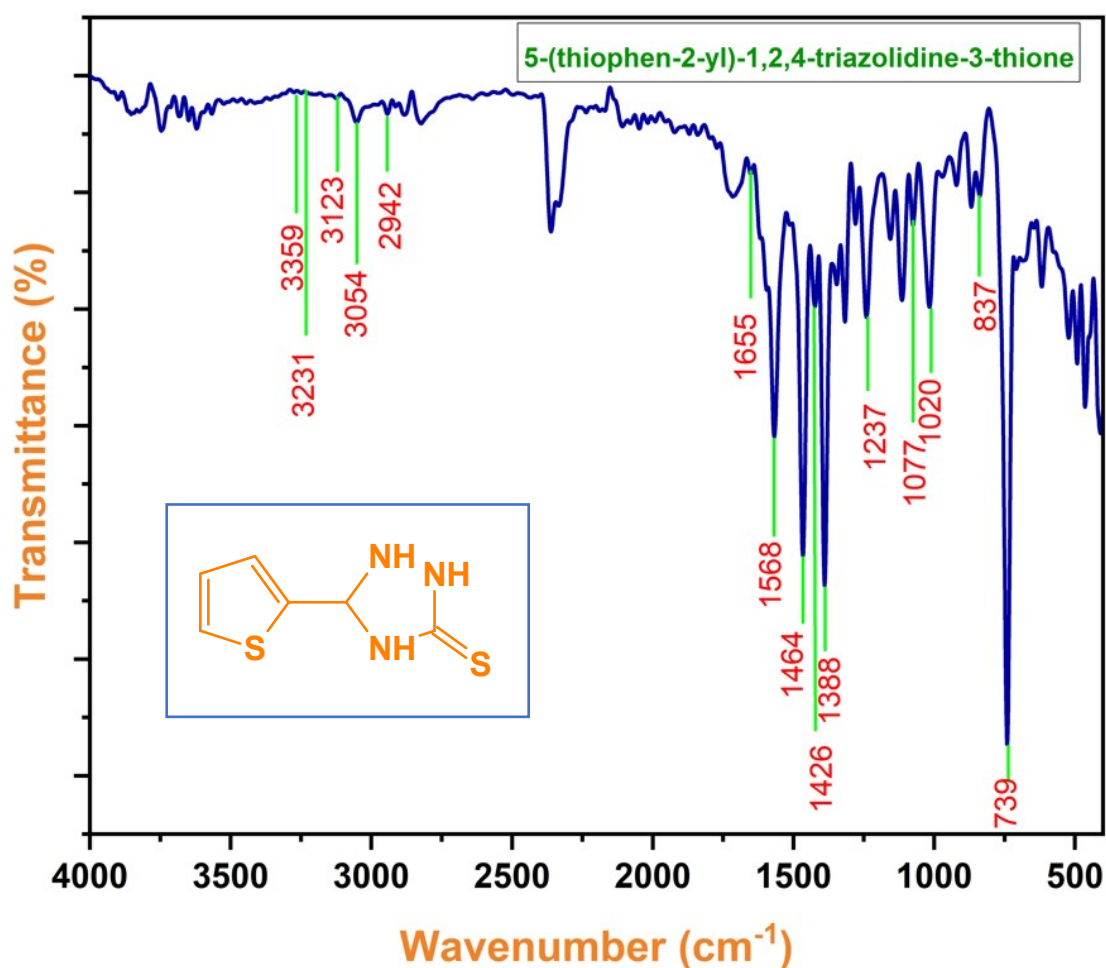

FTIR of 5-(thiophen-2-yl)-1,2,4-triazolidine-3-thione (3j)

AVB-1  
1H\_8scan DMSO {D:\Spectra} nmr 50

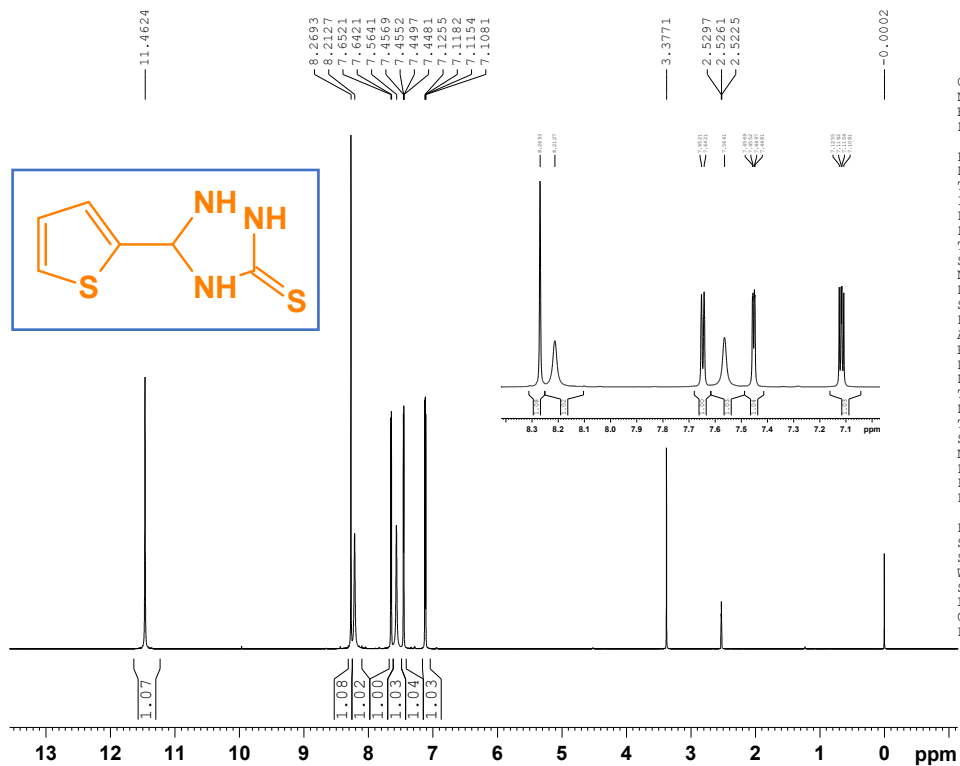

**<sup>1</sup>H NMR of 5-(thiophen-2-yl)-1,2,4-triazolidine-3-thione (3j)**

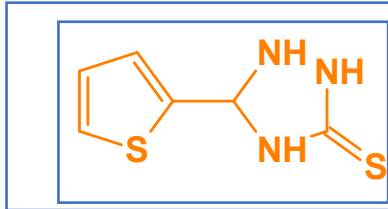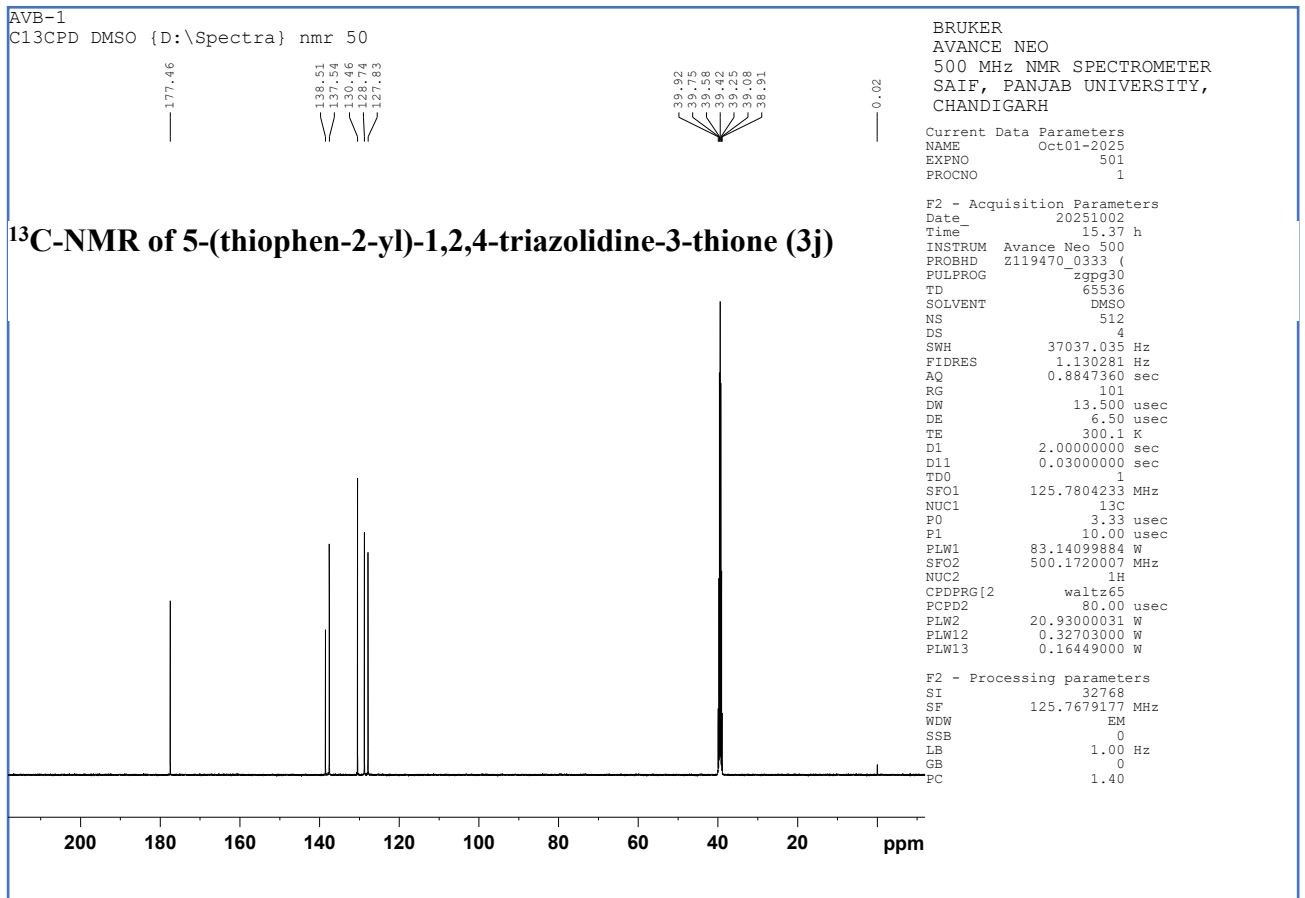

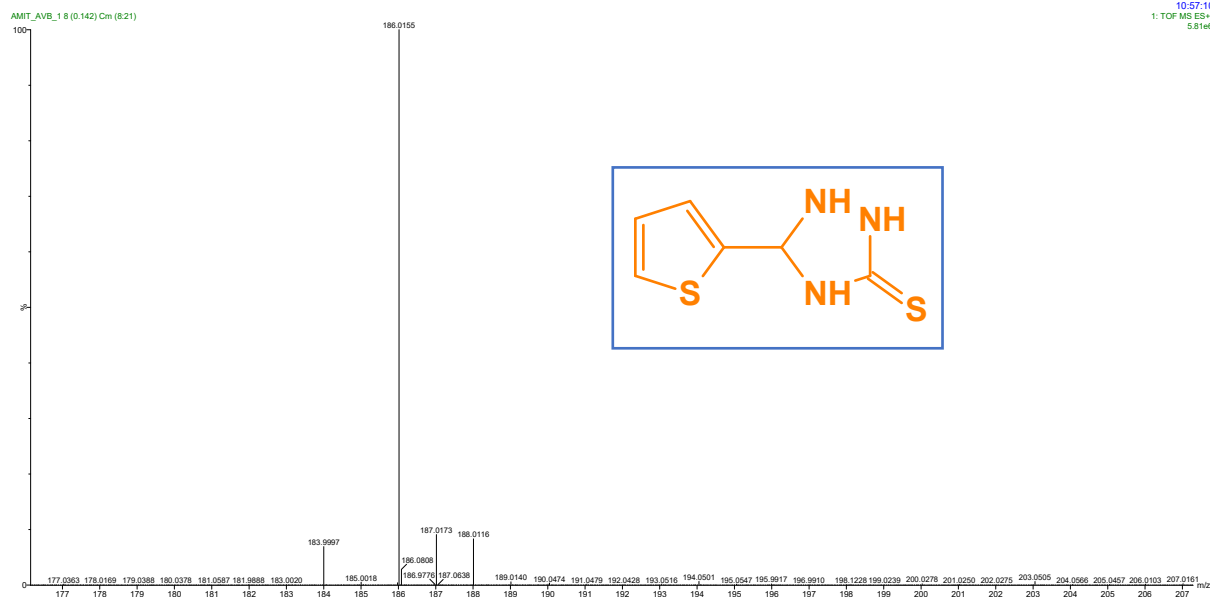

### HRMS of 5-(thiophen-2-yl)-1,2,4-triazolidine-3-thione (3j)

### 5-(4-bromophenyl)-1,2,4-triazolidine-3-thione (3k)

White crystal, Mp. 201-203 °C; IR (KBr): 3364, 3285, 1593, 1520, 1466, 1362, 1283, 1162, 1089, 1006, 923, 866, 693, 541  $\text{cm}^{-1}$ ;  $^1\text{H}$ NMR (500 MHz, DMSO- $d_6$ ):  $\delta$  7.5902-7.6072 (d, 2H, ArH,  $J = 8.5$  Hz), 7.7731-7.7901 (d, 2H, ArH,  $J = 8.5$  Hz), 8.0630 (s, 1H, CH), 8.0973 (s, 1H, NH), 8.2576 (s, 1H, NH), 11.5332 (s, 1H, NH);  $^{13}\text{C}$ -NMR (500 MHz, DMSO- $d_6$ ): 123.23, 129.12, 131.63, 133.38, 141.36, 178.10; HRMS {observed  $[\text{M}+1]$  peak: 259.99 (m/z)} {calculated  $[\text{M}]$  peak: 258.14 (m/z)}

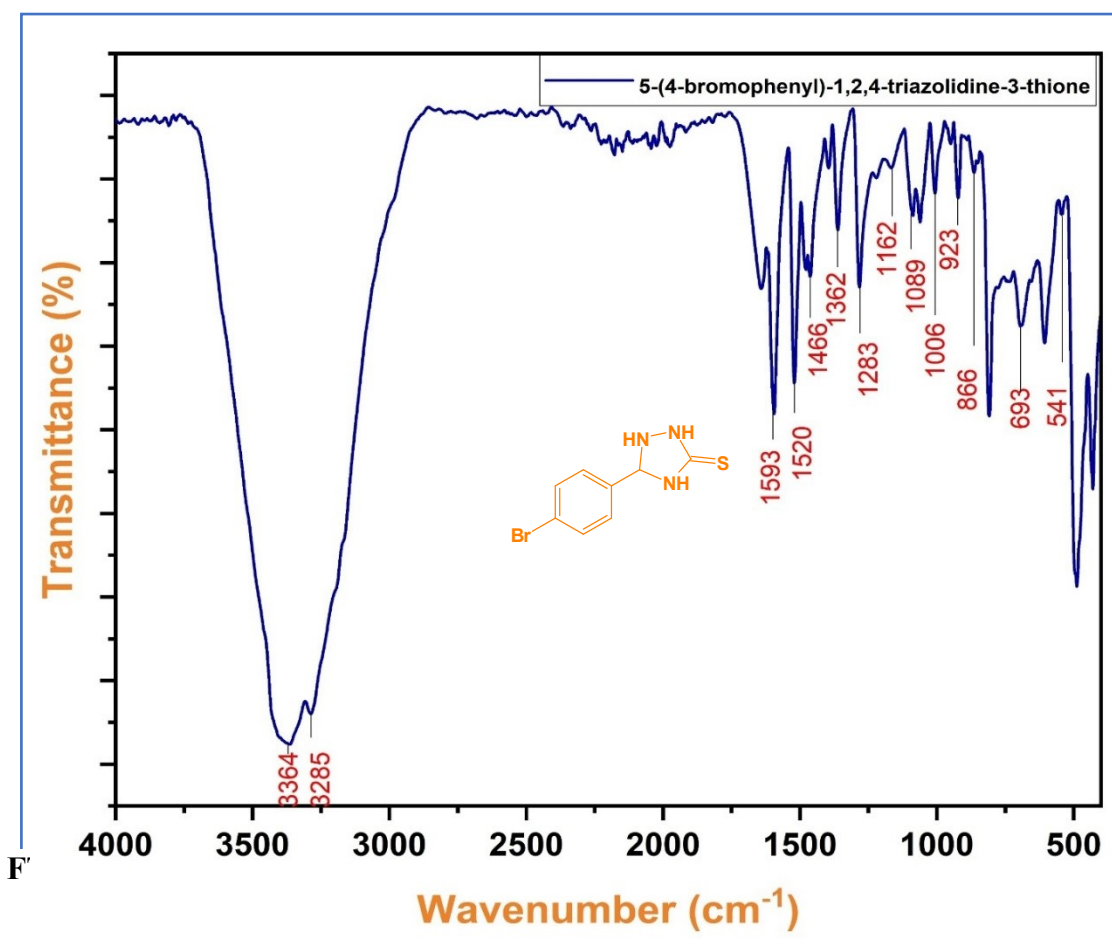

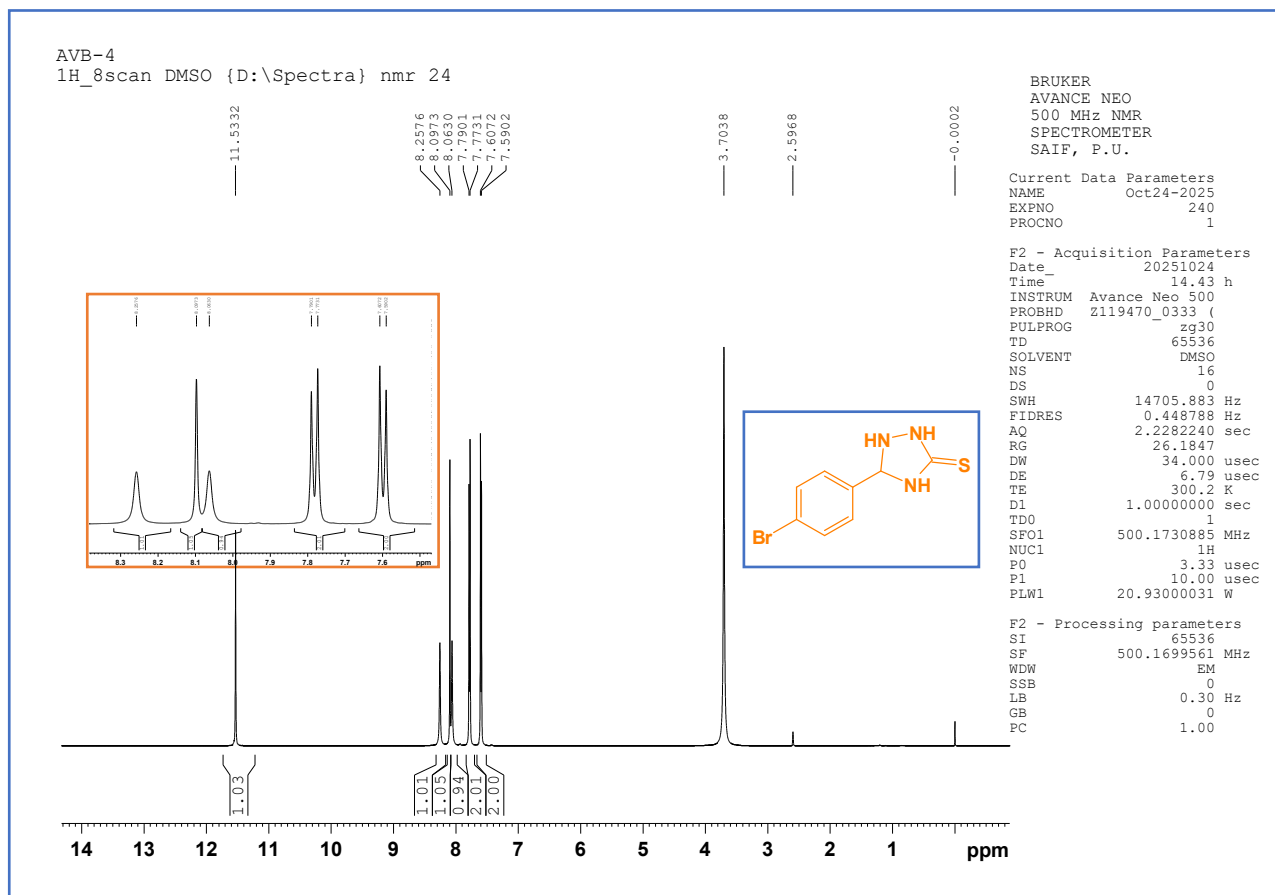

**<sup>1</sup>H NMR of 5-(4-bromophenyl)-1,2,4-triazolidine-3-thione (3k)**

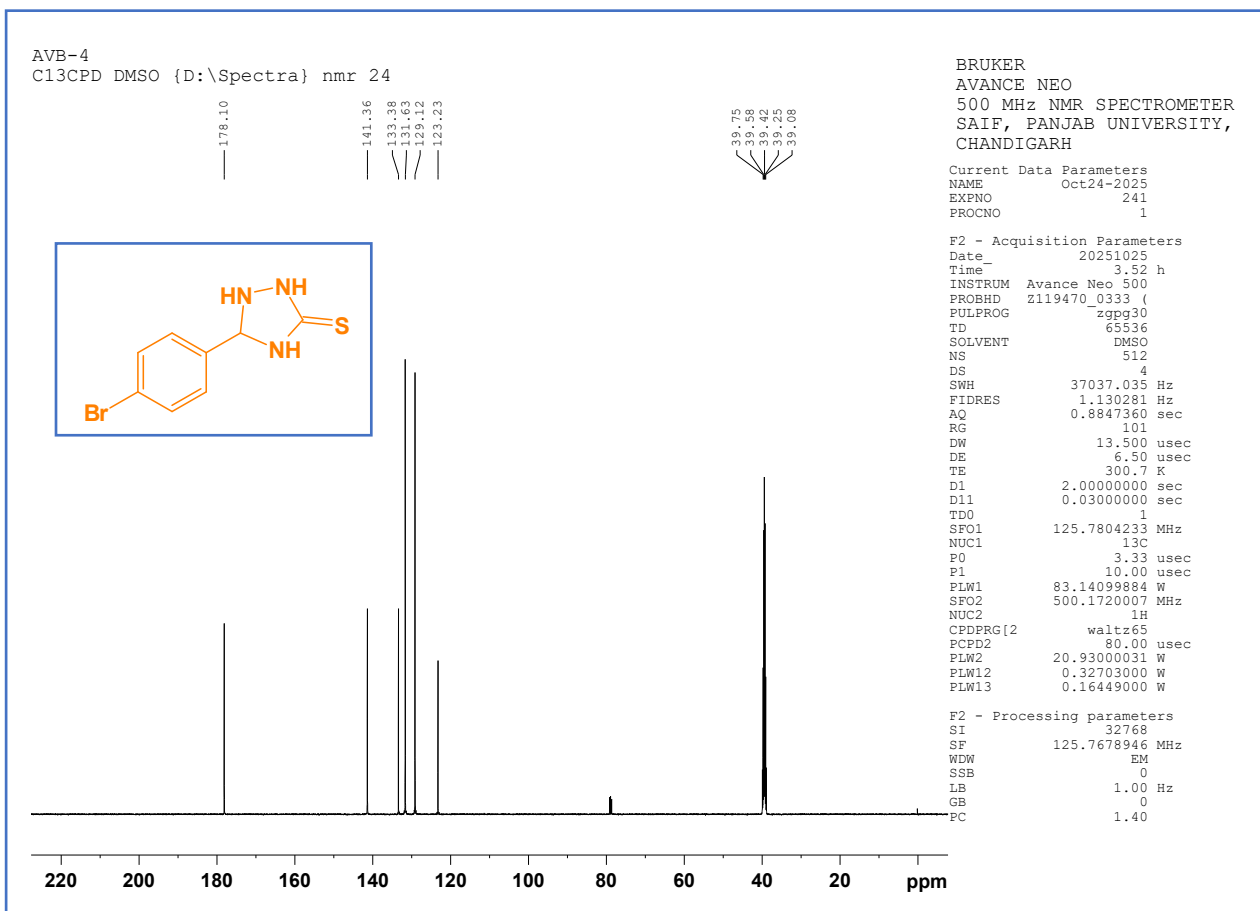

**<sup>13</sup>C-NMR of 5-(4-bromophenyl)-1,2,4-triazolidine-3-thione (3k)**

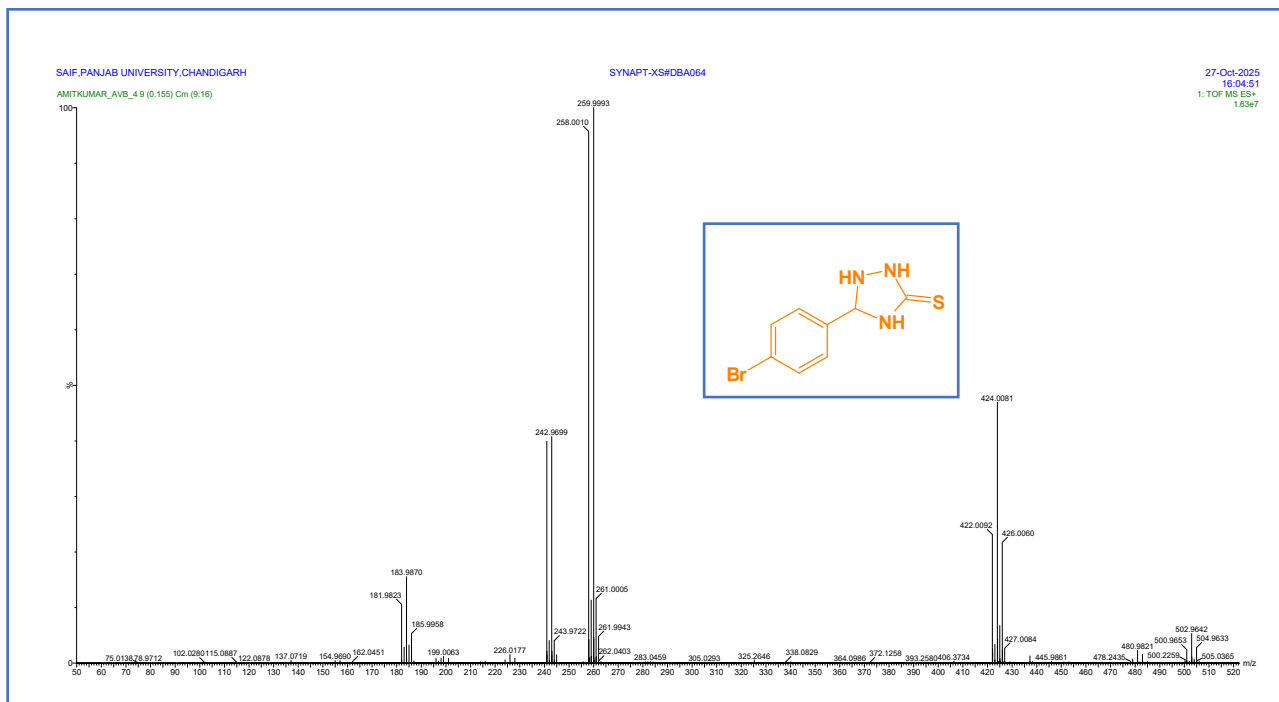

**HRMS of 5-(4-bromophenyl)-1,2,4-triazolidine-3-thione (3k)**

### 5-(furan-2-yl)-1,2,4-triazolidine-3-thione (3l)

Pale yellow solid, Mp. 187-189 °C; IR (KBr): 3393, 3214, 3129, 1578, 1471, 1338, 1274, 1148, 1095, 1054, 923, 837, 708, 541  $\text{cm}^{-1}$ ;  $^1\text{H}$ NMR (500 MHz, DMSO- $d_6$ ):  $\delta$  6.5713-6.5814 (q, 1H, ArH,  $J = 5$  Hz), 6.9027-6.9094(d, 1H, ArH,  $J = 3.5$  Hz), 7.5693 (s, 1H, CH), 7.7245-7.7266 (d, 1H, ArH,  $J=1$ Hz), 8.0037 (s, 1H, NH), 8.1157 (s, 1H, NH), 11.4321 (s, 1H, NH);  $^{13}\text{C}$ -NMR (500 MHz, DMSO- $d_6$ ): 112.14, 112.93, 132.70, 144.65, 149.25, 177.78; HRMS {observed  $[\text{M}+1]$  peak: 170.05 ( $m/z$ )} {calculated  $[\text{M}]$  peak: 169.20 ( $m/z$ )}

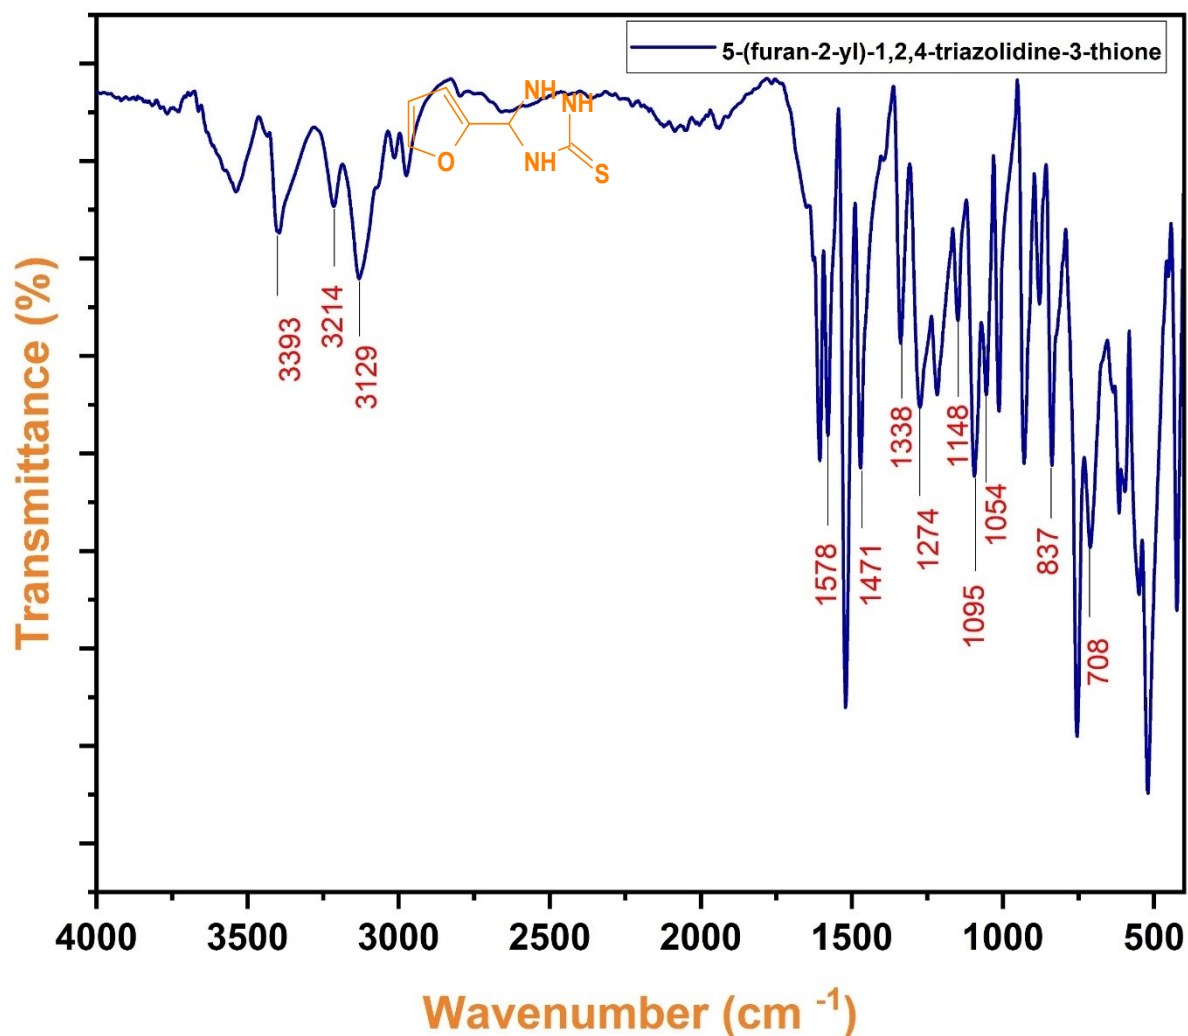

FTIR of 5-(furan-2-yl)-1,2,4-triazolidine-3-thione (3l)

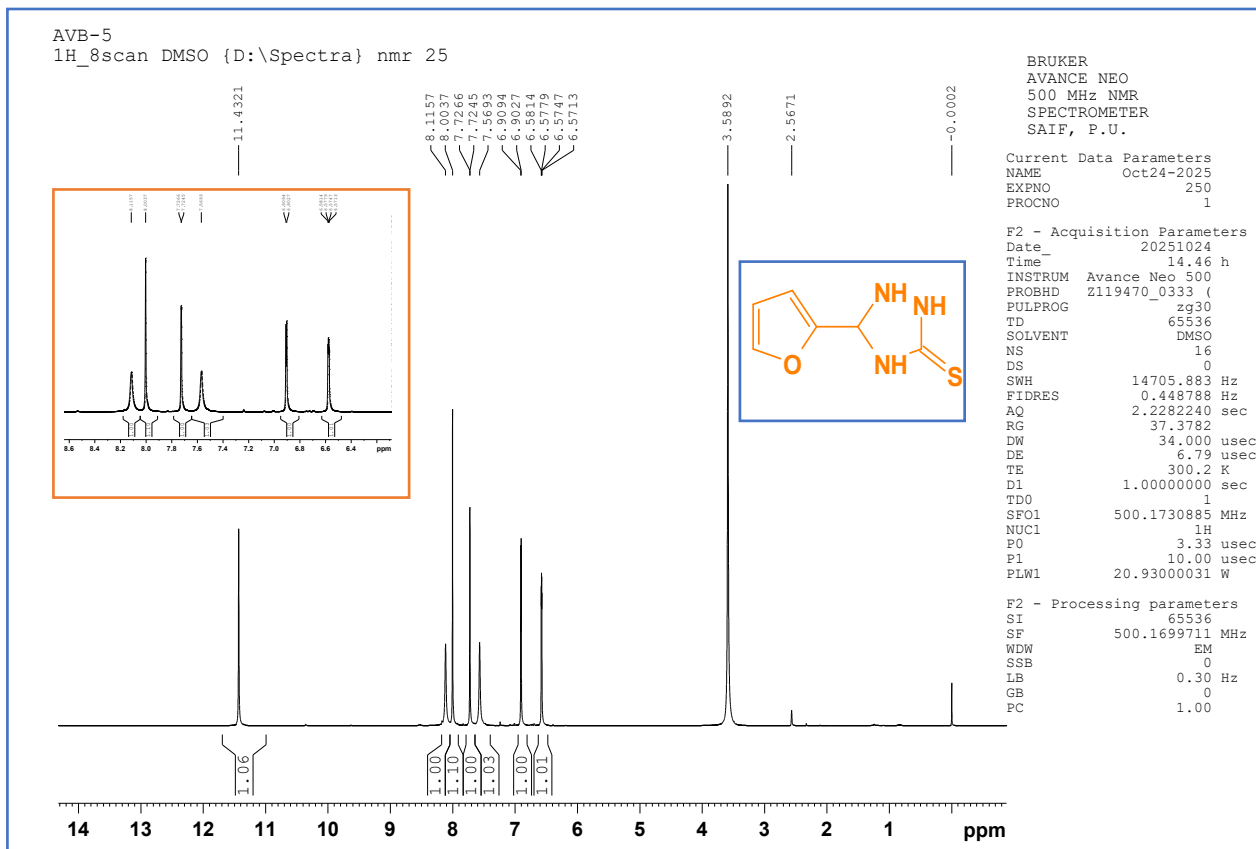

**<sup>1</sup>H NMR of 5-(furan-2-yl)-1,2,4-triazolidine-3-thione (31)**

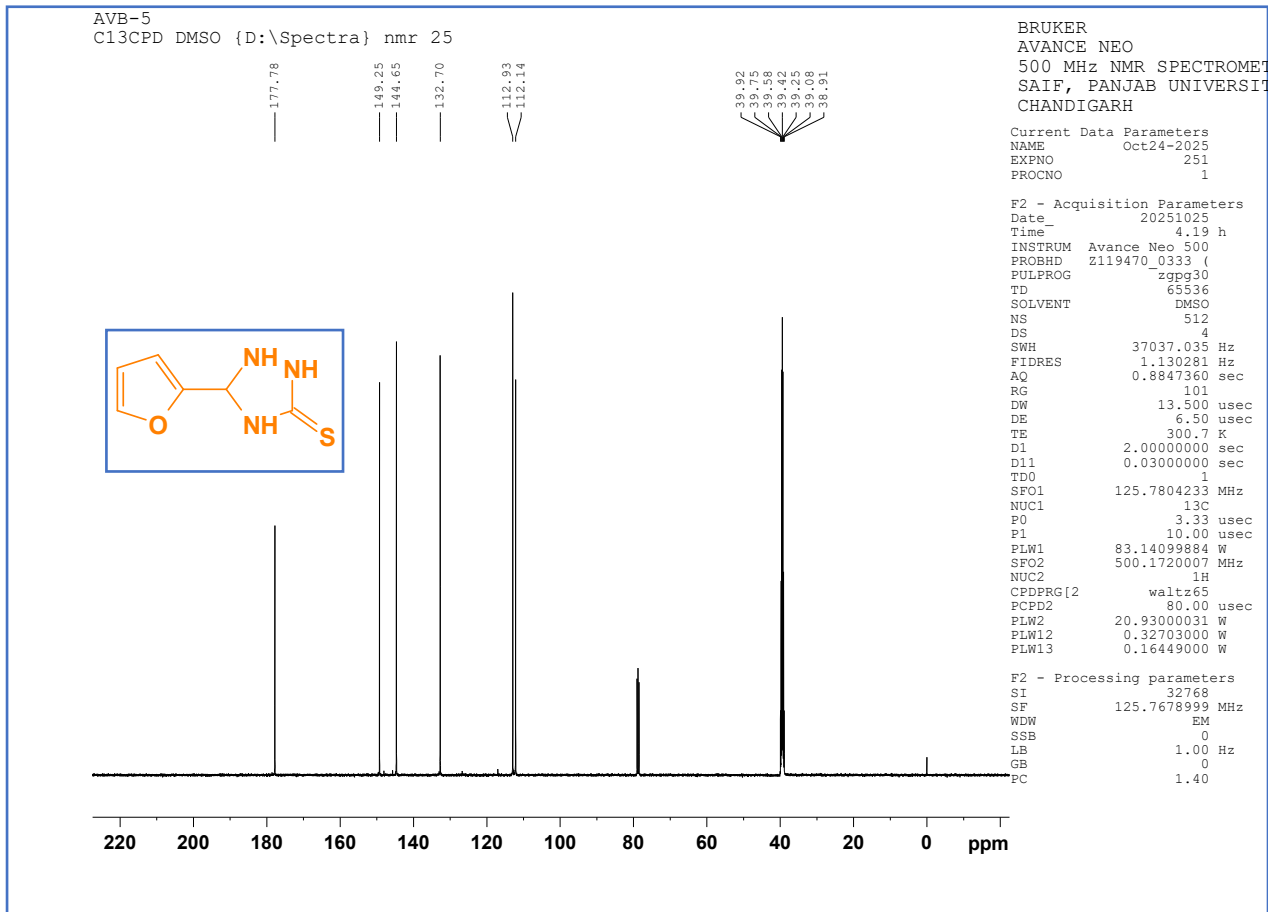

<sup>13</sup>C-NMR of 5-(furan-2-yl)-1,2,4-triazolidine-3-thione (3l)

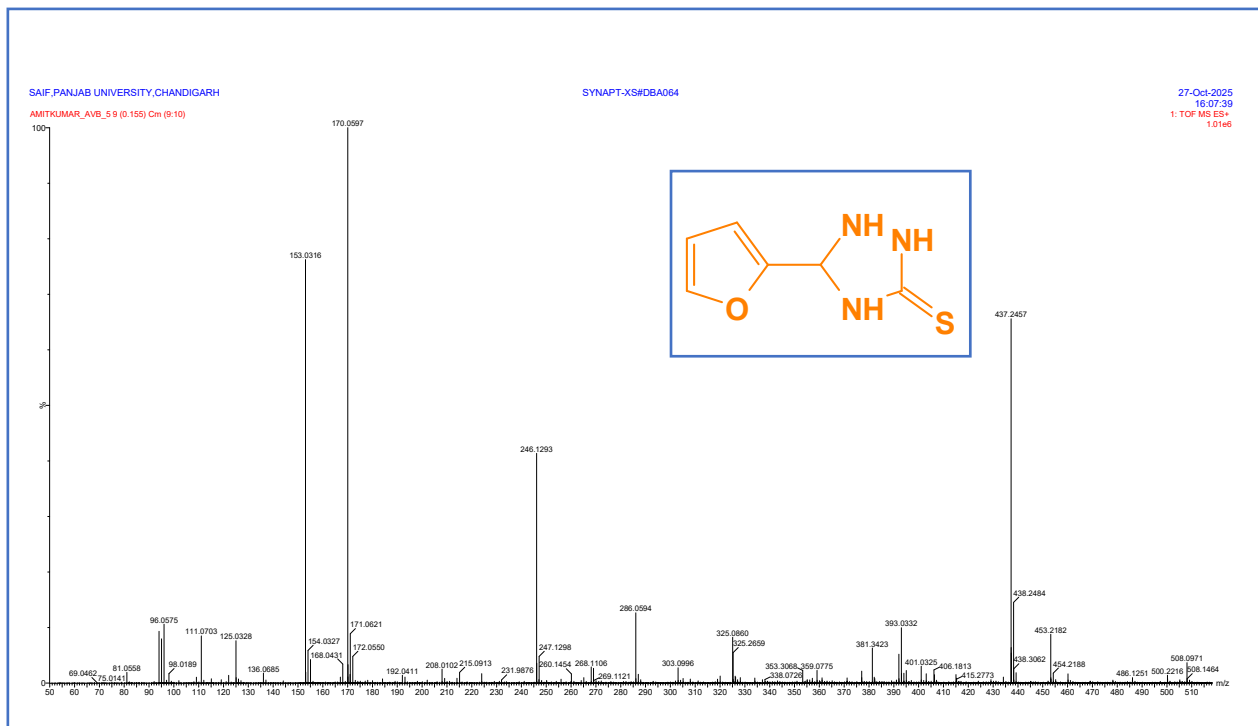

**HRMS of 5-(furan-2-yl)-1,2,4-triazolidine-3-thione (3l)**

### 5-(4-methoxyphenyl)-4-methyl-1,2,4-triazolidine-3-thione (3m)

White crystal, Mp. 203-204 °C; IR (KBr): 3334, 3265, 3024, 2926, 2859, 1601, 1569, 1391, 1240, 1157, 1074, 1013, 903, 868, 741, 521  $\text{cm}^{-1}$ ;  $^1\text{H}$ NMR (500 MHz, DMSO- $d_6$ ):  $\delta$  3.0566-3.0658 (br s, 3H, (N- $\text{CH}_3$ ),  $J = 4.5$  Hz), 3.8047 (s, 3H, (O- $\text{CH}_3$ ), 6.9769-6.9945 (d, 2H, ArH,  $J = 9$  Hz), 7.7489-7.7665 (d, 2H, ArH), 8.0385 (s, 1H, CH), 8.4370-8.4461 (br s, 1H, NH), 11.3765 (s, 1H, NH);  $^{13}\text{C}$ -NMR (500 MHz, DMSO- $d_6$ ): 30.73, 55.20, 114.08, 126.77, 128.74, 141.71, 160.57, 177.48; HRMS {observed  $[\text{M}+1]$  peak: 224.08 (m/z)} {calculated  $[\text{M}]$  peak: 223.29 (m/z)}.

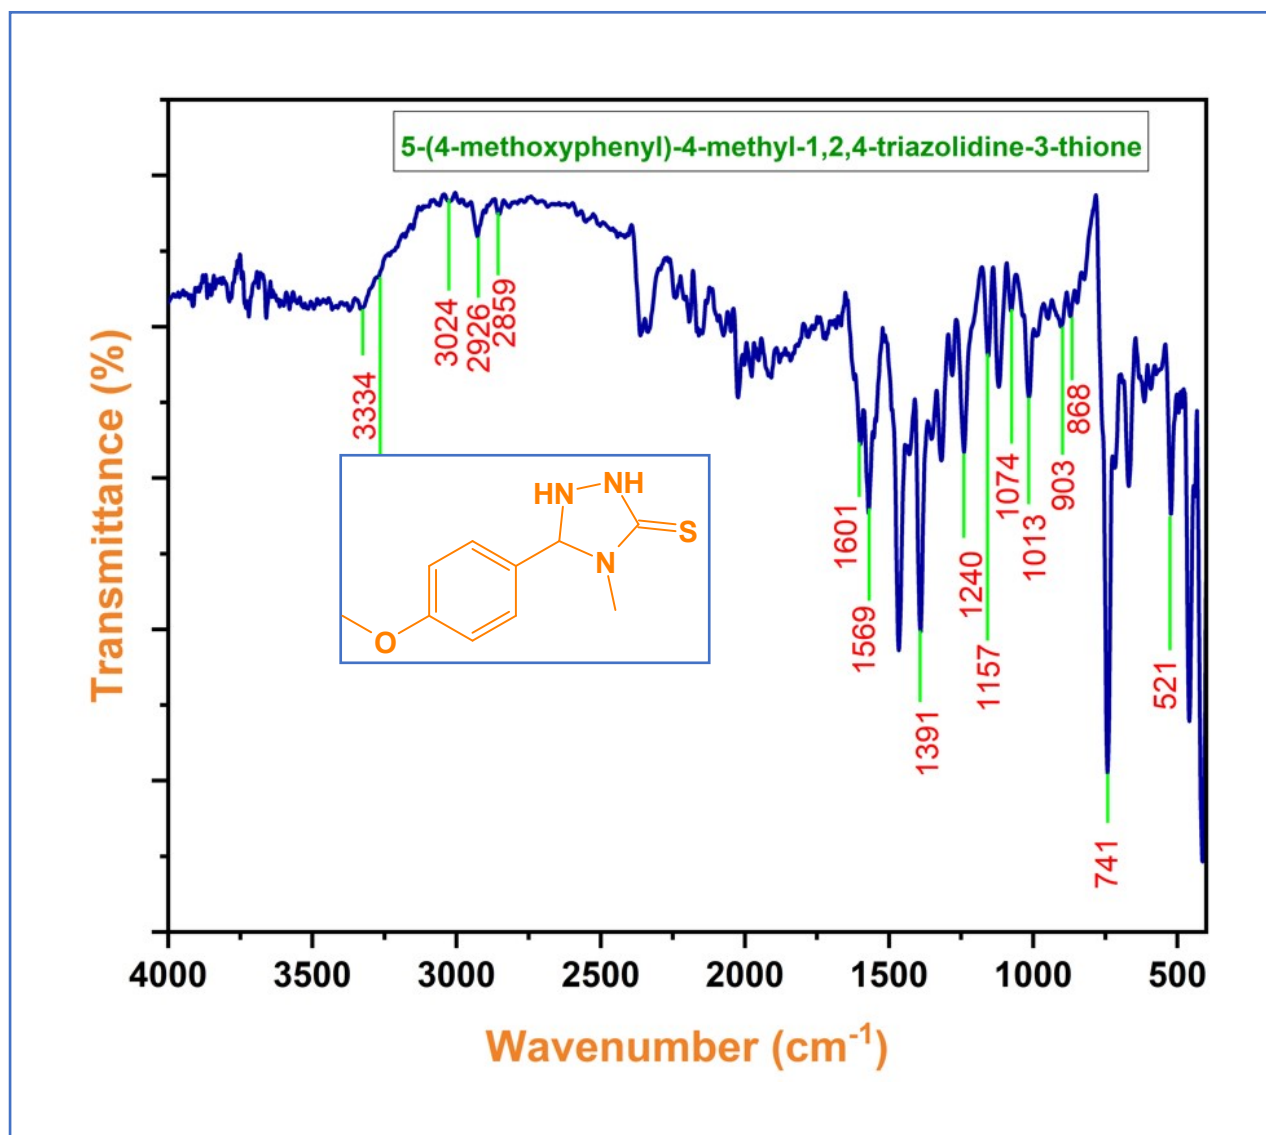

AVB-2  
1H\_8scan DMSO {D:\Spectra} nmr 51

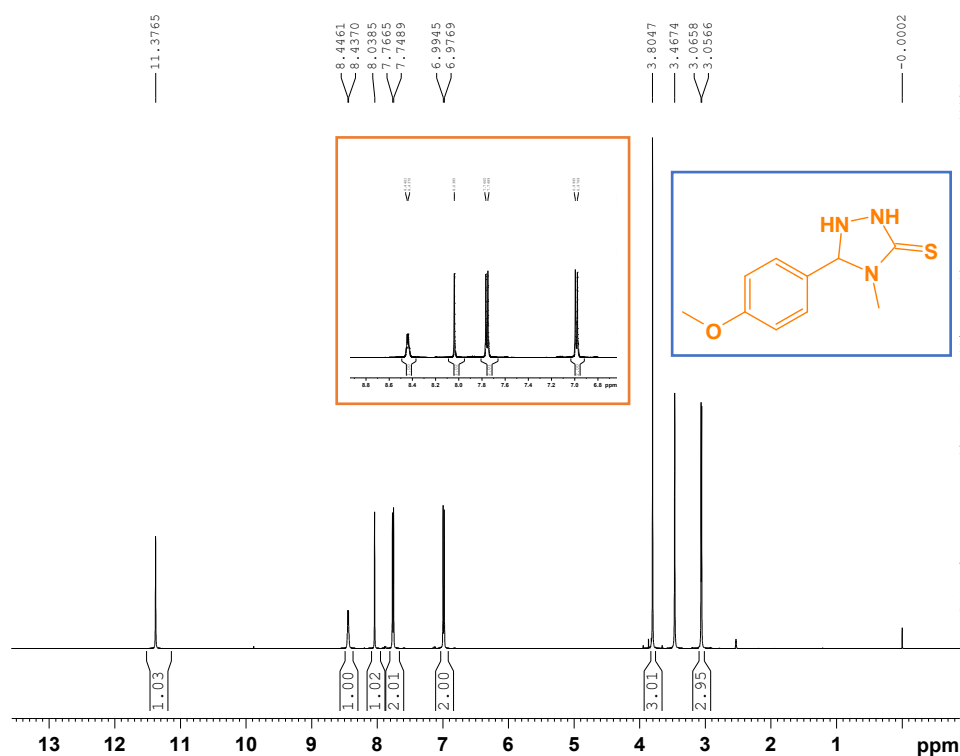

BRUKER  
AVANCE NEO  
500 MHz NMR  
SPECTROMETER  
SAIF, P.U.

Current Data Parameters  
NAME Oct01-2025  
EXPNO 510  
PROCNO 1

F2 - Acquisition Parameters  
Date\_ 20251002  
Time\_ 15.40 h  
INSTRUM Avance Neo 500  
PROBHD z119470\_0333 (  
PULPROG zg30  
TD 65536  
SOLVENT DMSO  
NS 16  
DS 0  
SWH 14705.883 Hz  
FIDRES 0.448788 Hz  
AQ 2.2282240 sec  
RG 33.2251  
DW 34.000 usec  
DE 6.79 usec  
TE 300.2 K  
D1 1.00000000 sec  
TD0 1  
SF01 500.1730885 MHz  
NUC1 1H  
P0 3.33 usec  
P1 10.00 usec  
PLW1 20.93000031 W

F2 - Processing parameters  
SI 65536  
SF 500.1699875 MHz  
WDW EM  
SSB 0  
LB 0.30 Hz  
GB 0  
PC 1.00

<sup>1</sup>H NMR of 5-(4-methoxyphenyl)-4-methyl-1,2,4-triazolidine-3-thione (3m)

AVB-2  
C13CPD DMSO {D:\Spectra} nmr 51

177.48  
160.57  
141.71  
128.74  
126.77  
114.08

55.20  
39.75  
39.58  
39.42  
39.25  
39.08  
39.73

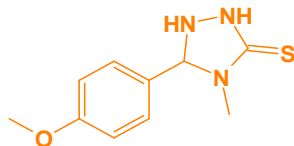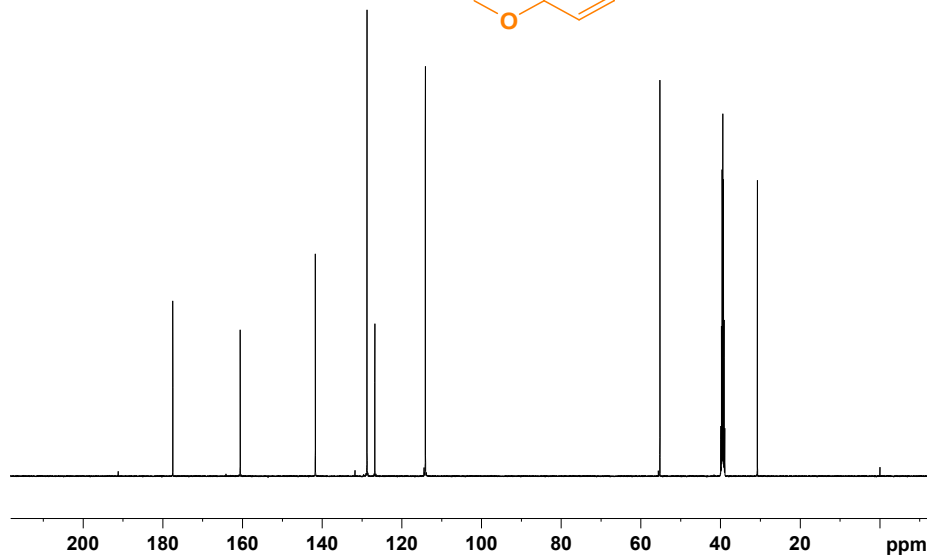

BRUKER  
AVANCE NEO  
500 MHz NMR SPECTROMETER  
SAIF, PANJAB UNIVERSITY,  
CHANDIGARH

Current Data Parameters  
NAME Oct01-2025  
EXPNO 511  
PROCNO 1

F2 - Acquisition Parameters  
Date\_ 20251002  
Time\_ 16.05 h  
INSTRUM Avance Neo 500  
PROBHD Z119470\_0333 (   
PULPROG zgpg30  
TD 65536  
SOLVENT DMSO  
NS 512  
DS 4  
SWH 37037.035 Hz  
FIDRES 1.130281 Hz  
AQ 0.8847360 sec  
RG 101  
DW 13.500 usec  
DE 6.50 usec  
TE 300.2 K  
D1 2.0000000 sec  
D11 0.03000000 sec  
TD0 1  
SFO1 125.7804233 MHz  
NUC1 13C  
P0 3.33 usec  
P1 10.00 usec  
PLW1 83.14099884 W  
SFO2 500.1720007 MHz  
NUC2 1H  
CPDPRG2 waltz65  
PCPD2 80.00 usec  
PLW2 20.93000031 W  
PLW12 0.32703000 W  
PLW13 0.16449000 W  
F2 - Processing parameters  
SI 32768  
SF 125.7679109 MHz  
WDW EM  
SSB 0  
LB 1.00 Hz  
GB 0  
PC 1.40

<sup>13</sup>C-NMR of 5-(4-methoxyphenyl)-4-methyl-1,2,4-triazolidine-3-thione (3m)

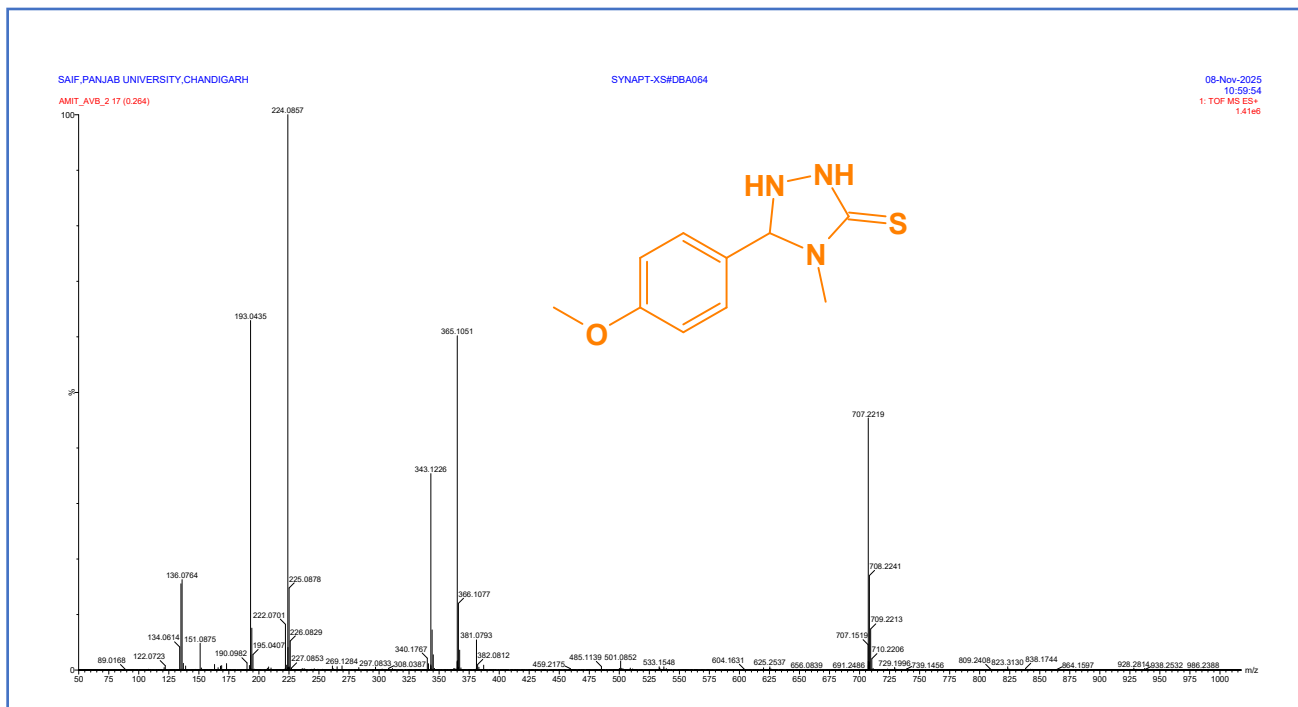

HRMS of 5-(4-methoxyphenyl)-4-methyl-1,2,4-triazolidine-3-thione (3m)

### 5-(4-chlorophenyl)-4-methyl-1,2,4-triazolidine-3-thione (3n)

White crystal, Mp. 178-181 °C; IR (KBr): 3473, 3373, 3153, 1598, 1569, 1467, 1391, 1237, 1156, 1057, 1012, 922, 868, 741, 688, 502  $\text{cm}^{-1}$ ;  $^1\text{H-NMR}$  (500 MHz,  $\text{DMSO-d}_6$ ):  $\delta$  3.0393-3.0484 (br s, 3H, N-CH<sub>3</sub>), 7.4699-7.4870 (d, 2H, ArH), 7.8366-7.8537 (d, 2H, ArH), 8.0469 (s, 1H, CH), 8.5678-8.5767 (br s, 1H, NH), 11.5466 (s, 1H, NH);  $^{13}\text{C-NMR}$  (500 MHz,  $\text{DMSO-d}_6$ ): 30.72, 128.55, 128.67, 133.16, 134.01, 140.14, 177.69 ; HRMS {observed [M+1] peak: 224.08 (m/z)} {calculated [M] peak: 223.29 (m/z)}.

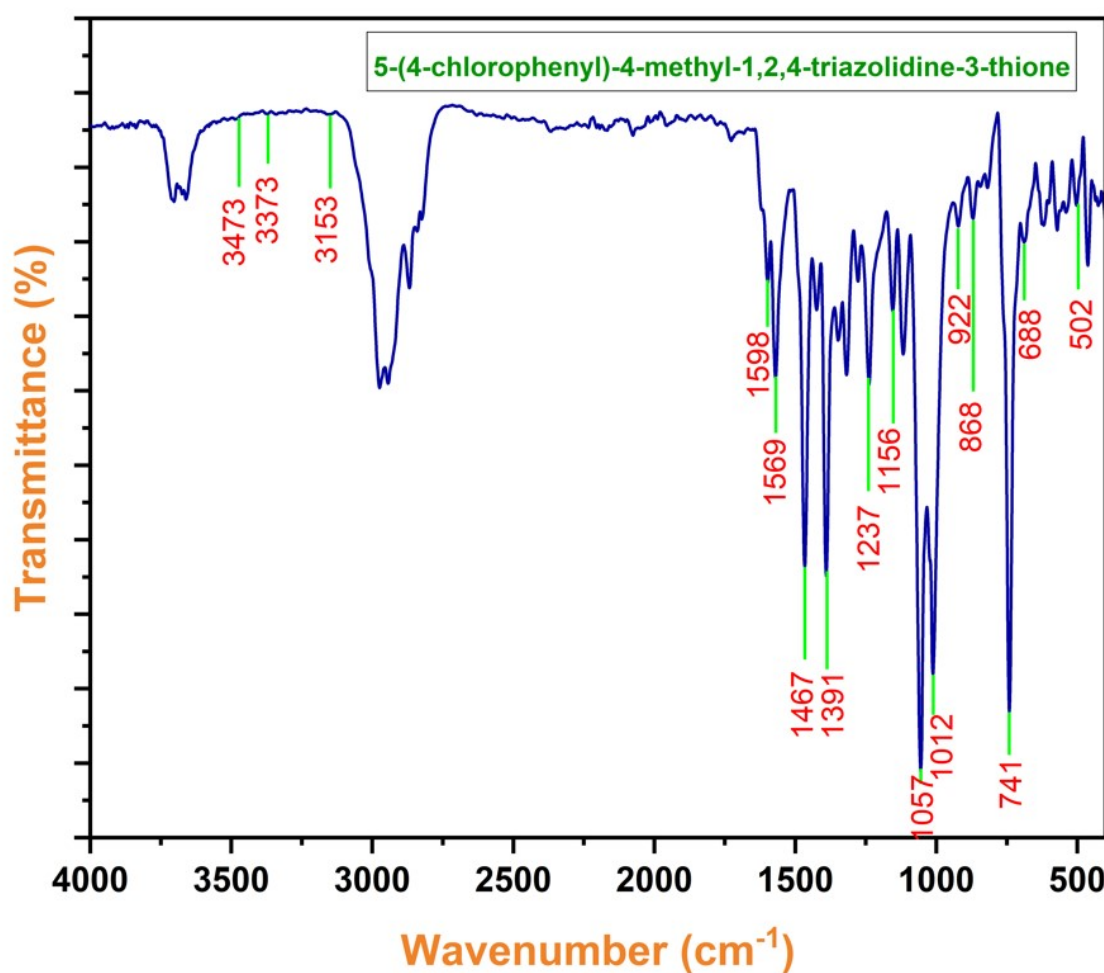

FTIR of 5-(4-chlorophenyl)-4-methyl-1,2,4-triazolidine-3-thione (3n)

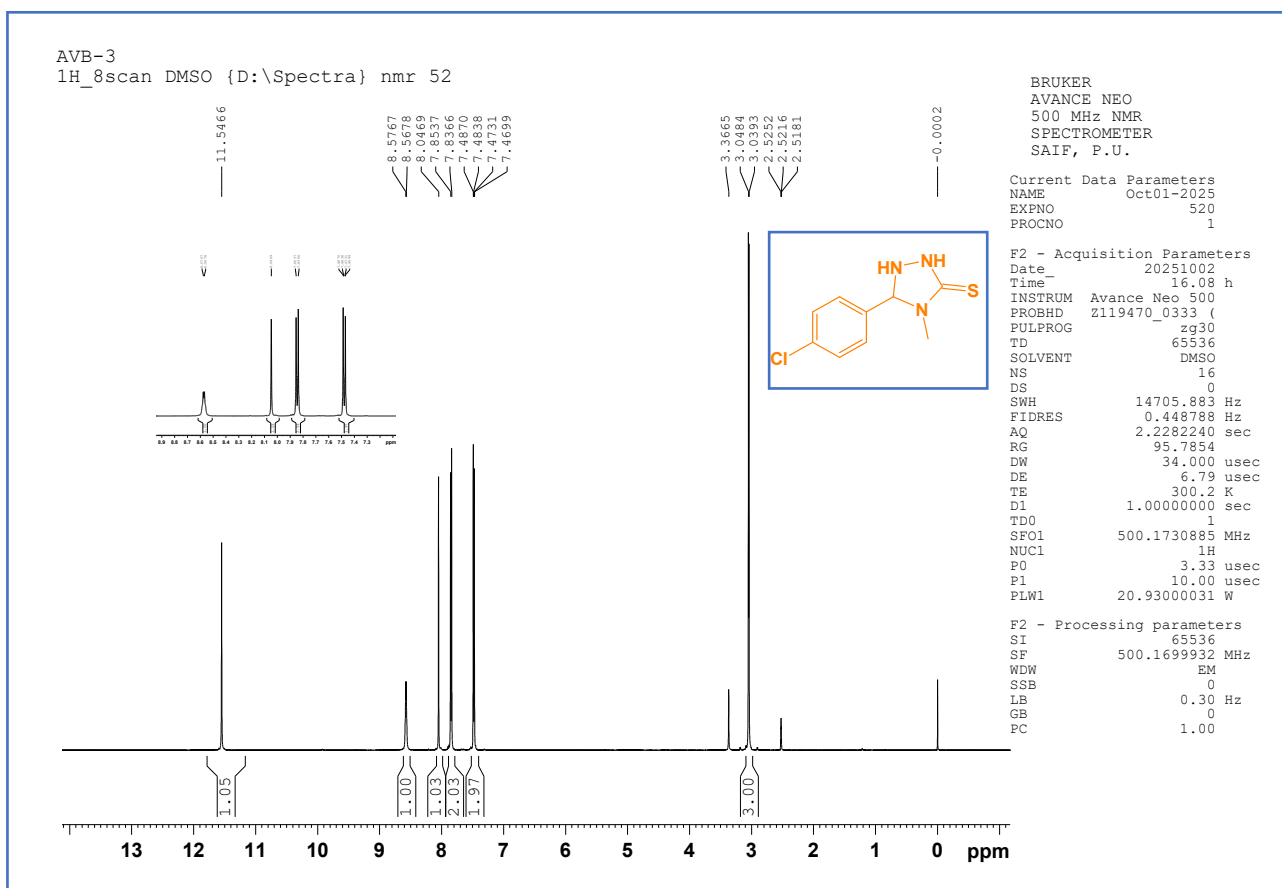

**<sup>1</sup>H NMR of 5-(4-chlorophenyl)-4-methyl-1,2,4-triazolidine-3-thione (3n)**

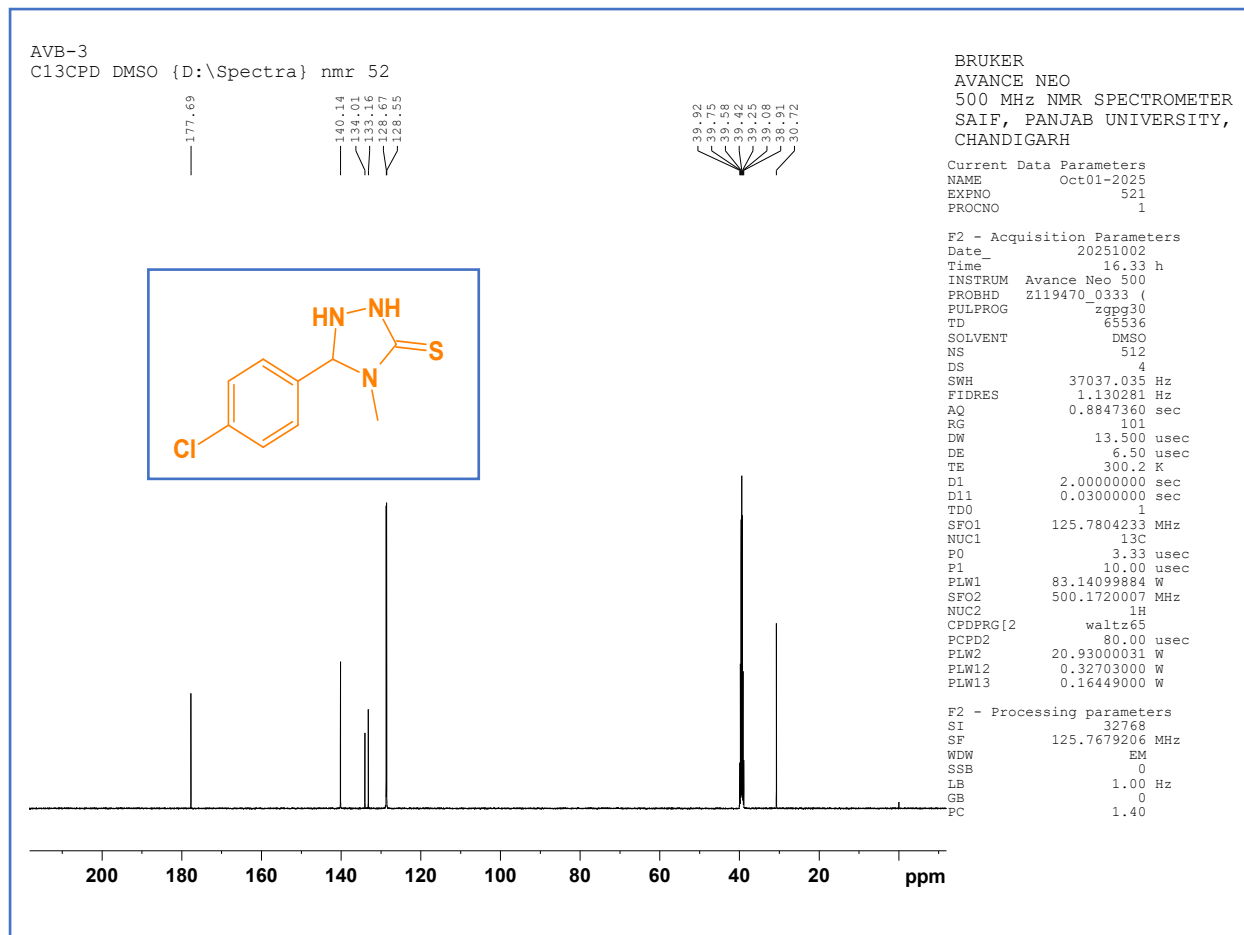

**<sup>13</sup>C-NMR of 5-(4-chlorophenyl)-4-methyl-1,2,4-triazolidine-3-thione (3n)**

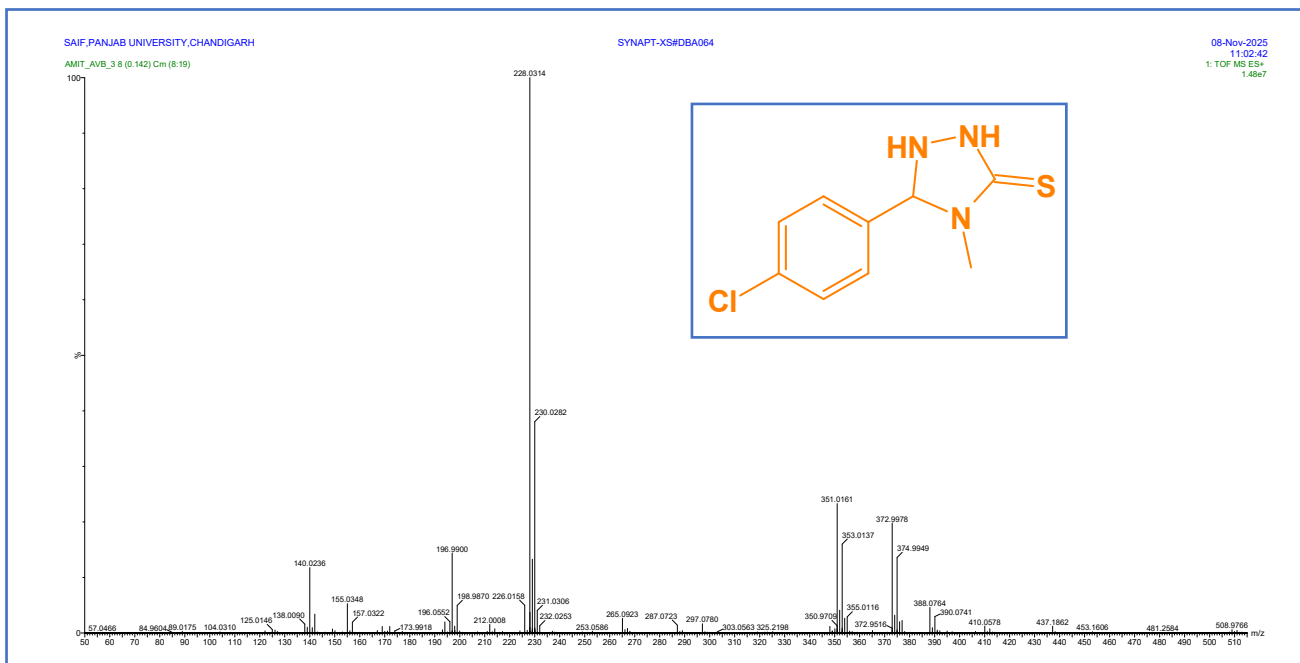

**HRMS of 5-(4-chlorophenyl)-4-methyl-1,2,4-triazolidine-3-thione (3n)**

SI8:

Table 1: Optimisation of reaction conditions <sup>a</sup>

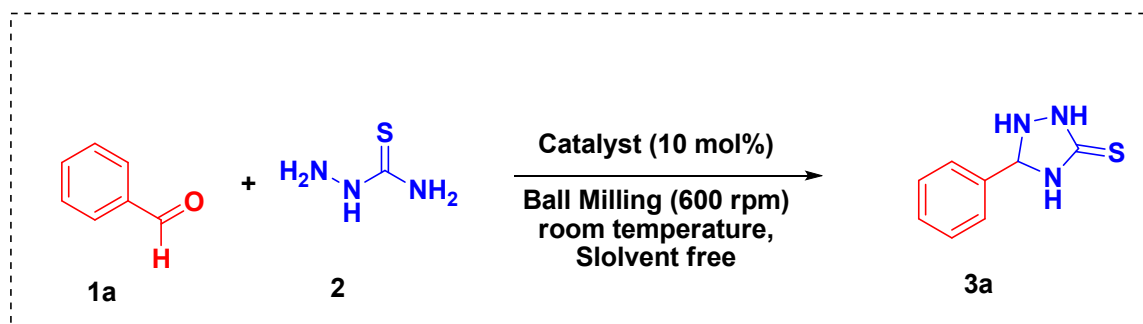

| Entry | Products (3a)  | Catalyst / Additives                     | Time (min)    | Catalyst (mol %) | Yield (%) <sup>b</sup> |
|-------|----------------|------------------------------------------|---------------|------------------|------------------------|
| 1     | Assembly (I)   | NiFe <sub>2</sub> O <sub>4</sub> NPs     | 15 min        | 5                | 35                     |
| 2     |                | NiFe <sub>2</sub> O <sub>4</sub> NPs     | 20 min        | 5                | 41                     |
| 3     |                | NiFe <sub>2</sub> O <sub>4</sub> NPs     | 25 min        | 5                | 44                     |
| 4     |                | NiFe <sub>2</sub> O <sub>4</sub> NPs     | 30 min        | 5                | 57                     |
| 5     |                | NiFe <sub>2</sub> O <sub>4</sub> NPs     | 35 min        | 5                | 59                     |
| 6     |                | NiFe <sub>2</sub> O <sub>4</sub> NPs     | 40 min        | 5                | 63                     |
| 7     |                | NiFe <sub>2</sub> O <sub>4</sub> NPs     | 45 min        | 5                | 66                     |
| 8     | Assembly (II)  | NiFe <sub>2</sub> O <sub>4</sub> NPs     | 15 min        | 10               | 78                     |
| 9     |                | NiFe <sub>2</sub> O <sub>4</sub> NPs     | 20 min        | 10               | 81                     |
| 10    |                | NiFe <sub>2</sub> O <sub>4</sub> NPs     | 25 min        | 10               | 88                     |
| 11    |                | <b>NiFe<sub>2</sub>O<sub>4</sub> NPs</b> | <b>30 min</b> | <b>10</b>        | <b>97</b>              |
| 12    |                | NiFe <sub>2</sub> O <sub>4</sub> NPs     | 35 min        | 10               | 94                     |
| 13    |                | NiFe <sub>2</sub> O <sub>4</sub> NPs     | 40 min        | 10               | 91                     |
| 14    |                | NiFe <sub>2</sub> O <sub>4</sub> NPs     | 45 min        | 10               | 90                     |
| 15    | Assembly (III) | NiFe <sub>2</sub> O <sub>4</sub> NPs     | 15 min        | 15               | 74                     |
| 16    |                | NiFe <sub>2</sub> O <sub>4</sub> NPs     | 20 min        | 15               | 80                     |
| 17    |                | NiFe <sub>2</sub> O <sub>4</sub> NPs     | 25 min        | 15               | 82                     |
| 18    |                | NiFe <sub>2</sub> O <sub>4</sub> NPs     | 30 min        | 15               | 86                     |
| 19    |                | NiFe <sub>2</sub> O <sub>4</sub> NPs     | 35 min        | 15               | 85                     |
| 20    |                | NiFe <sub>2</sub> O <sub>4</sub> NPs     | 40 min        | 15               | 83                     |
| 21    |                | NiFe <sub>2</sub> O <sub>4</sub> NPs     | 45 min        | 15               | 81                     |
| 22    | Assembly (IV)  | NiFe <sub>2</sub> O <sub>4</sub> NPs     | 50 min        | 10               | 88                     |
| 23    |                | NiFe <sub>2</sub> O <sub>4</sub> NPs     | 55 min        | 10               | 85                     |
| 24    |                | NiFe <sub>2</sub> O <sub>4</sub> NPs     | 60 min        | 10               | 83                     |
| 25    |                | NiFe <sub>2</sub> O <sub>4</sub> NPs     | 60 min        | 15               | 87                     |
| 26    | Assembly (V)   | CoFe <sub>2</sub> O <sub>4</sub> NPs     | 30 min        | 10               | 22                     |
| 27    |                | CuFe <sub>2</sub> O <sub>4</sub> NPs     | 30 min        | 10               | 25                     |
| 28    |                | Fe <sub>3</sub> O <sub>4</sub> NPs       | 30 min        | 10               | 10                     |
| 29    |                | ZnFe <sub>2</sub> O <sub>4</sub> NPs     | 30 min        | 10               | 22                     |
| 30    |                | No catalyst                              | 30 min        | -                | NR                     |

<sup>a</sup> Reaction Conditions: Benzaldehyde (1mmol), Thiosemicarbazide (1mmol), Solvent free, room temperature under ball-milling condition (600 rpm), NR: Not recovered, <sup>b</sup> isolated yield.

**SI 9:**

**Table 2** Effect of reaction conditions on the yield of (3a).

| Entry | Catalyst                                 | Catalyst (Mole%) | Time (min) | Rotation (rpm) | Yield (%) <sup>b</sup> |
|-------|------------------------------------------|------------------|------------|----------------|------------------------|
| 1     | NiFe <sub>2</sub> O <sub>4</sub> NPs     | 5                | 30         | 400            | 51                     |
| 2     | NiFe <sub>2</sub> O <sub>4</sub> NPs     | 5                | 30         | 500            | 54                     |
| 3     | NiFe <sub>2</sub> O <sub>4</sub> NPs     | 5                | 30         | 600            | 57                     |
| 4     | NiFe <sub>2</sub> O <sub>4</sub> NPs     | 10               | 30         | 400            | 95                     |
| 5     | NiFe <sub>2</sub> O <sub>4</sub> NPs     | 10               | 30         | 500            | 96                     |
| 6     | <b>NiFe<sub>2</sub>O<sub>4</sub> NPs</b> | <b>10</b>        | <b>30</b>  | <b>600</b>     | <b>97</b>              |
| 7     | NiFe <sub>2</sub> O <sub>4</sub> NPs     | 15               | 30         | 400            | 83                     |
| 8     | NiFe <sub>2</sub> O <sub>4</sub> NPs     | 15               | 30         | 500            | 84                     |
| 9     | NiFe <sub>2</sub> O <sub>4</sub> NPs     | 15               | 30         | 600            | 86                     |
| 10    | NiFe <sub>2</sub> O <sub>4</sub> NPs     | 20               | 30         | 400            | 88                     |
| 11    | NiFe <sub>2</sub> O <sub>4</sub> NPs     | 20               | 30         | 500            | 91                     |
| 12    | NiFe <sub>2</sub> O <sub>4</sub> NPs     | 20               | 30         | 600            | 93                     |

<sup>b</sup> Isolated yield, Model reaction (3a): benzaldehyde (1.0 mmol), thiosemicarbazide (1.0 mmol) under ball milling condition.

**SI 10:**

**Table 3:** Comparison of Nano NiFe<sub>2</sub>O<sub>4</sub>-catalyzed conventional methodologies for the synthesis of (3a).

| Entry | Catalyst                             | Catalyst (mol%) | Reaction Condition                   | Time (min) | Yield (%) <sup>b</sup> |
|-------|--------------------------------------|-----------------|--------------------------------------|------------|------------------------|
| 1     | NiFe <sub>2</sub> O <sub>4</sub> NPs | 5               | Reflux/ EtOH: H <sub>2</sub> O (1:1) | 30         | 22                     |
| 2     | NiFe <sub>2</sub> O <sub>4</sub> NPs | 5               | Reflux/ EtOH: H <sub>2</sub> O (1:1) | 60         | 30                     |
| 3     | NiFe <sub>2</sub> O <sub>4</sub> NPs | 5               | Reflux/ EtOH: H <sub>2</sub> O (1:1) | 90         | 38                     |
| 4     | NiFe <sub>2</sub> O <sub>4</sub> NPs | 5               | Reflux/ EtOH: H <sub>2</sub> O (1:1) | 120        | 43                     |
| 5     | NiFe <sub>2</sub> O <sub>4</sub> NPs | 10              | Reflux/ EtOH: H <sub>2</sub> O (1:1) | 30         | 50                     |
| 6     | NiFe <sub>2</sub> O <sub>4</sub> NPs | 10              | Reflux/ EtOH: H <sub>2</sub> O (1:1) | 60         | 55                     |
| 7     | NiFe <sub>2</sub> O <sub>4</sub> NPs | 10              | Reflux/ EtOH: H <sub>2</sub> O (1:1) | 90         | 57                     |
| 8     | NiFe <sub>2</sub> O <sub>4</sub> NPs | 10              | Reflux/ EtOH: H <sub>2</sub> O (1:1) | 120        | 56                     |
| 9     | NiFe <sub>2</sub> O <sub>4</sub> NPs | 15              | Reflux/ EtOH: H <sub>2</sub> O (1:1) | 30         | 52                     |
| 10    | NiFe <sub>2</sub> O <sub>4</sub> NPs | 15              | Reflux/ EtOH: H <sub>2</sub> O (1:1) | 60         | 54                     |
| 11    | NiFe <sub>2</sub> O <sub>4</sub> NPs | 15              | Reflux/ EtOH: H <sub>2</sub> O (1:1) | 90         | 56                     |
| 12    | NiFe <sub>2</sub> O <sub>4</sub> NPs | 15              | Reflux/ EtOH: H <sub>2</sub> O (1:1) | 120        | 55                     |
| 13    | NiFe <sub>2</sub> O <sub>4</sub> NPs | 20              | Reflux/ EtOH: H <sub>2</sub> O (1:1) | 30         | 50                     |
| 14    | NiFe <sub>2</sub> O <sub>4</sub> NPs | 20              | Reflux/ EtOH: H <sub>2</sub> O (1:1) | 60         | 51                     |
| 15    | NiFe <sub>2</sub> O <sub>4</sub> NPs | 20              | Reflux/ EtOH: H <sub>2</sub> O (1:1) | 90         | 49                     |
| 16    | NiFe <sub>2</sub> O <sub>4</sub> NPs | 20              | Reflux/ EtOH: H <sub>2</sub> O (1:1) | 120        | 52                     |
| 17    | No Catalyst                          | --              | Reflux/ EtOH: H <sub>2</sub> O (1:1) | 90         | NR                     |

<sup>b</sup> Isolated yield, Model reaction (3a): benzaldehyde (1.0 mmol), thiosemicarbazide (1.0 mmol) under conventional condition, NR: Not recovered.

SI 11:

**Table 4: (A) Calculation of Green Chemistry Metrics (EcoScale and E-factor & atom economy)**

**(A) Calculation of Ecoscale:**

**1. EcoScale Score for the synthesis of 5-phenyl-1,2,4-triazolidine-3-thione (3a) under the ball-milling conditions:**

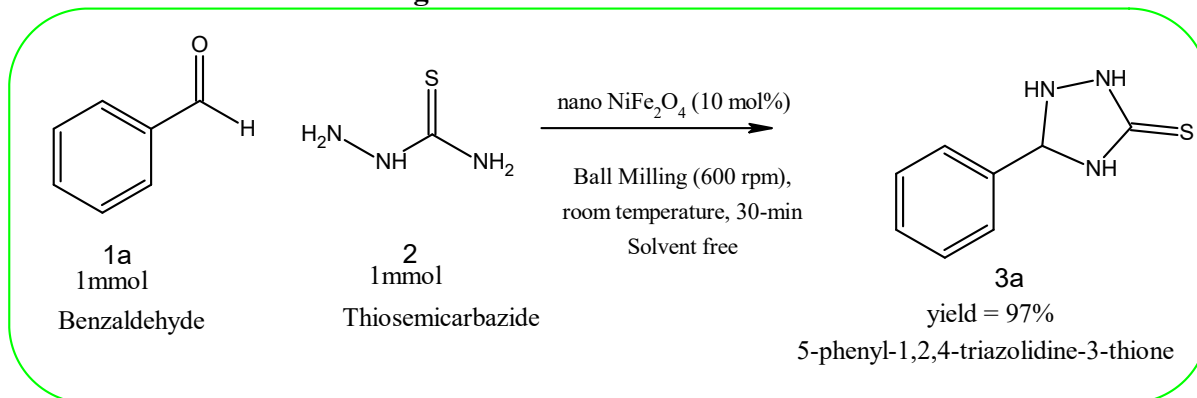

| Parameter                                                                                               | Penalty    |
|---------------------------------------------------------------------------------------------------------|------------|
| 1. Yield 97%                                                                                            | 1.5        |
| 2. Price of reaction components                                                                         |            |
| Benzaldehyde: <b>cheap</b>                                                                              | 0          |
| Thiosemicarbazide: <b>inexpensive</b>                                                                   | 0          |
| nano NiFe <sub>2</sub> O <sub>4</sub> : <b>recyclable, low cost</b>                                     | 0          |
| 3. Safety                                                                                               |            |
| Benzaldehyde: <b>mild irritant</b>                                                                      |            |
| Thiosemicarbazide: <b>toxic if swallowed, irritant</b>                                                  | 3          |
| Nano NiFe <sub>2</sub> O <sub>4</sub> : <b>No highly flammable, explosive, or carcinogenic reagents</b> |            |
| 4. Technical setup                                                                                      |            |
| Unconventional activation technique                                                                     | 2          |
| 5. Temperature/time                                                                                     | 0          |
| Room temperature < 1 h                                                                                  |            |
| 6. Workup & Purification                                                                                |            |
| None                                                                                                    | 0          |
| <b>Total Penalty Points</b>                                                                             | <b>6.5</b> |

**EcoScale Score = 100- Total Penalty Points = 93.5**

**2. EcoScale Score for the synthesis of 5-(2-chlorophenyl)-1,2,4-triazolidine-3-thione (3b) under the ball-milling conditions:**

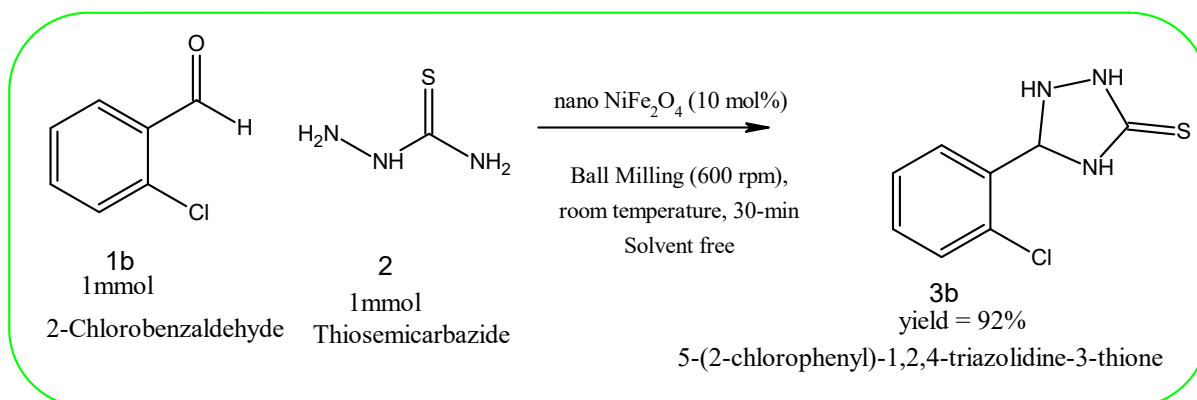

| Parameter                                                                                               | Penalty  |
|---------------------------------------------------------------------------------------------------------|----------|
| 1. Yield 92%                                                                                            | 4        |
| <b>2. Price of reaction components</b>                                                                  |          |
| 2-Chlorobenzaldehyde: <b>cheap</b>                                                                      | 0        |
| Thiosemicarbazide: <b>inexpensive</b>                                                                   | 0        |
| nano NiFe <sub>2</sub> O <sub>4</sub> : <b>recyclable, low cost</b>                                     | 0        |
| <b>3. Safety</b>                                                                                        |          |
| 2-Chlorobenzaldehyde: <b>irritant, lachrymator, harmful if swallowed</b>                                | 3        |
| Thiosemicarbazide: <b>toxic if swallowed, irritant</b>                                                  |          |
| Nano NiFe <sub>2</sub> O <sub>4</sub> : <b>No highly flammable, explosive, or carcinogenic reagents</b> |          |
| <b>4. Technical setup</b>                                                                               |          |
| Unconventional activation technique                                                                     | 2        |
| <b>5. Temperature/time</b>                                                                              |          |
| Room temperature < 1 h                                                                                  | 0        |
| <b>6. Workup &amp; Purification</b>                                                                     |          |
| None                                                                                                    | 0        |
| <b>Total Penalty Points</b>                                                                             | <b>9</b> |

**EcoScale Score = 100- Total Penalty Points = 91**

**3. EcoScale Score for the synthesis of 5-(4-Nitrophenyl)-1,2,4-triazolidine-3-thione (3c) under the ball-milling conditions:**

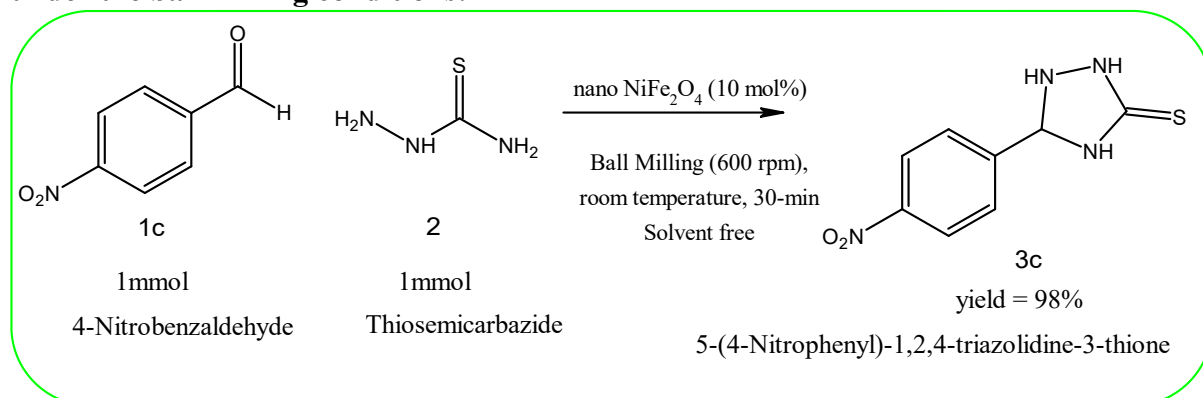

| Parameter                                                                                               | Penalty  |
|---------------------------------------------------------------------------------------------------------|----------|
| 1. Yield 98%                                                                                            | 1        |
| 2. Price of reaction components                                                                         |          |
| 4-Nitrobenzaldehyde: <b>cheap</b>                                                                       | 0        |
| Thiosemicarbazide: <b>inexpensive</b>                                                                   | 0        |
| nano NiFe <sub>2</sub> O <sub>4</sub> : <b>recyclable, low cost</b>                                     | 0        |
| 3. Safety                                                                                               |          |
| 4-Nitrobenzaldehyde: <b>harmful, irritant, possible mutagenic concerns</b>                              | 3        |
| Thiosemicarbazide: <b>toxic if swallowed, irritant</b>                                                  |          |
| Nano NiFe <sub>2</sub> O <sub>4</sub> : <b>No highly flammable, explosive, or carcinogenic reagents</b> |          |
| 4. Technical setup                                                                                      |          |
| Unconventional activation technique                                                                     | 2        |
| 5. Temperature/time                                                                                     |          |
| Room temperature < 1 h                                                                                  | 0        |
| 6. Workup & Purification                                                                                |          |
| None                                                                                                    | 0        |
| <b>Total Penalty Points</b>                                                                             | <b>6</b> |

**EcoScale Score = 100- Total Penalty Points = 94**



**4. EcoScale Score for the synthesis of 5-(2-Nitrophenyl)-1,2,4-triazolidine-3-thione (3d) under the ball-milling conditions:**

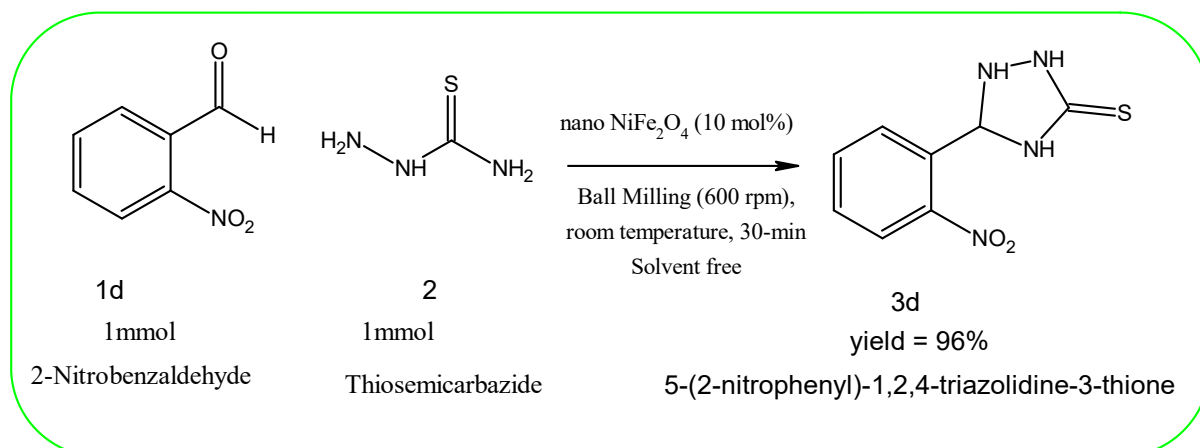

| Parameter                                                                                               | Penalty  |
|---------------------------------------------------------------------------------------------------------|----------|
| 1. Yield 96%                                                                                            | 2        |
| 2. Price of reaction components                                                                         |          |
| 2-Nitrobenzaldehyde: <b>inexpensive</b>                                                                 | 0        |
| Thiosemicarbazide: <b>inexpensive</b>                                                                   | 0        |
| nano NiFe <sub>2</sub> O <sub>4</sub> : <b>recyclable, low cost</b>                                     | 0        |
| 3. Safety                                                                                               |          |
| 2-Nitrobenzaldehyde: <b>harmful if swallowed, irritant</b>                                              |          |
| Thiosemicarbazide: <b>toxic if swallowed, irritant</b>                                                  | 3        |
| Nano NiFe <sub>2</sub> O <sub>4</sub> : <b>No highly flammable, explosive, or carcinogenic reagents</b> |          |
| 4. Technical setup                                                                                      |          |
| Unconventional activation technique                                                                     | 2        |
| 5. Temperature/time                                                                                     |          |
| Room temperature < 1 h                                                                                  | 0        |
| 6. Workup & Purification                                                                                |          |
| None                                                                                                    | 0        |
| <b>Total Penalty Points</b>                                                                             | <b>7</b> |

**EcoScale Score = 100- Total Penalty Points = 93**

**5. EcoScale Score for the synthesis of 5-(4-Hydroxyphenyl)-1,2,4-triazolidine-3-thione (3e) under the ball-milling conditions:**

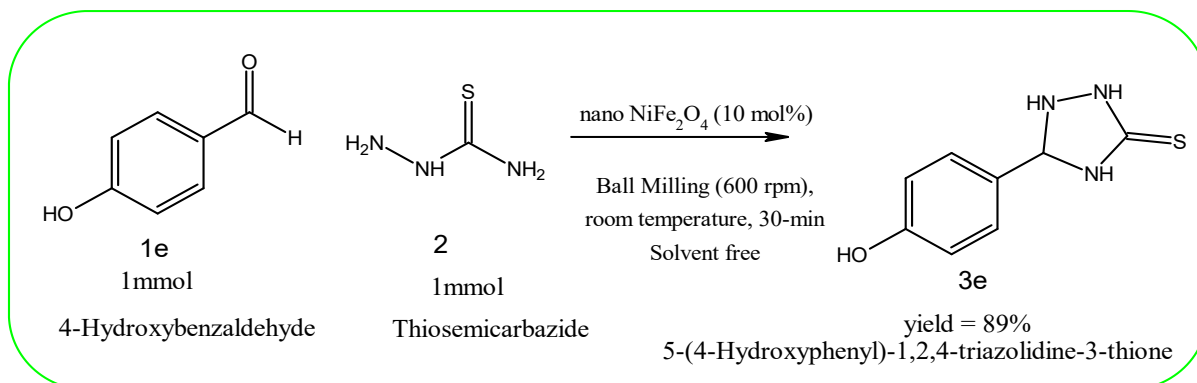

| Parameter                                                                                               | Penalty     |
|---------------------------------------------------------------------------------------------------------|-------------|
| 1. Yield 89%                                                                                            | 5.5         |
| 2. Price of reaction components                                                                         |             |
| 4-Hydroxybenzaldehyde: <b>cheap</b>                                                                     | 0           |
| Thiosemicarbazide: <b>inexpensive</b>                                                                   | 0           |
| nano NiFe <sub>2</sub> O <sub>4</sub> : <b>recyclable, low cost</b>                                     | 0           |
| 3. Safety                                                                                               |             |
| 4-Hydroxybenzaldehyde: <b>mild irritant, low acute toxicity</b>                                         |             |
| Thiosemicarbazide: <b>acute oral toxicity, irritant</b>                                                 | 3           |
| Nano NiFe <sub>2</sub> O <sub>4</sub> : <b>No highly flammable, explosive, or carcinogenic reagents</b> |             |
| 4. Technical setup                                                                                      |             |
| Unconventional activation technique                                                                     | 2           |
| 5. Temperature/time                                                                                     | 0           |
| Room temperature < 1 h                                                                                  |             |
| 6. Workup & Purification                                                                                |             |
| None                                                                                                    | 0           |
| <b>Total Penalty Points</b>                                                                             | <b>10.5</b> |

**EcoScale Score = 100- Total Penalty Points = 89.5**

6. EcoScale Score for the synthesis of 5-(4-Methoxyphenyl)-1,2,4-triazolidine-3-thione (3f) under the ball-milling conditions:

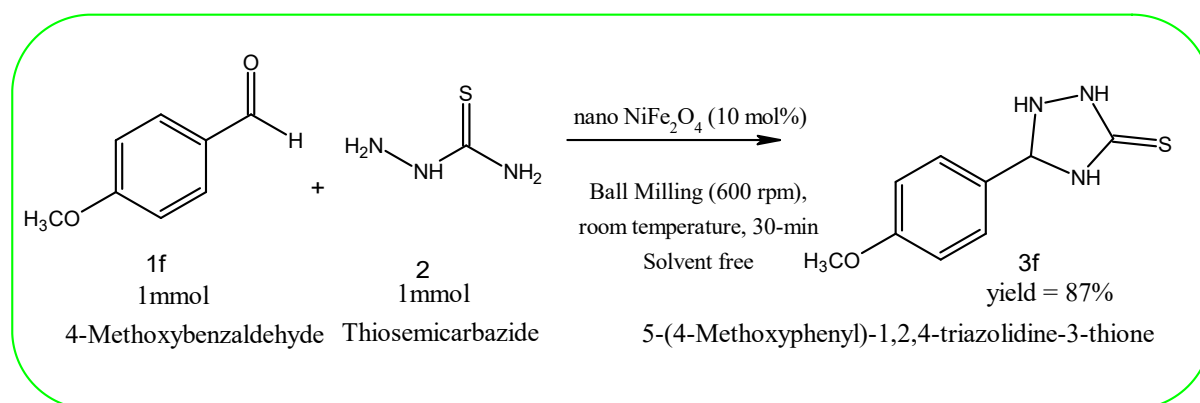

| Parameter                                                                                               | Penalty     |
|---------------------------------------------------------------------------------------------------------|-------------|
| 1. Yield 87%                                                                                            | 6.5         |
| 2. Price of reaction components                                                                         |             |
| 4-Methoxybenzaldehyde: <b>cheap</b>                                                                     | 0           |
| Thiosemicarbazide: <b>inexpensive</b>                                                                   | 0           |
| nano NiFe <sub>2</sub> O <sub>4</sub> : <b>recyclable, low cost</b>                                     | 0           |
| 3. Safety                                                                                               |             |
| 4-Methoxybenzaldehyde: <b>low toxicity</b>                                                              |             |
| Thiosemicarbazide: <b>acute oral toxicity, irritant</b>                                                 | 3           |
| Nano NiFe <sub>2</sub> O <sub>4</sub> : <b>No highly flammable, explosive, or carcinogenic reagents</b> |             |
| 4. Technical setup                                                                                      |             |
| Unconventional activation technique                                                                     | 2           |
| 5. Temperature/time                                                                                     | 0           |
| Room temperature < 1 h                                                                                  |             |
| 6. Workup & Purification                                                                                |             |
| None                                                                                                    | 0           |
| <b>Total Penalty Points</b>                                                                             | <b>11.5</b> |

EcoScale Score = 100- Total Penalty Points = 88.5

7. EcoScale Score for the synthesis of 5-(4-Chlorophenyl)-1,2,4-triazolidine-3-thione (3g) under the ball-milling conditions:

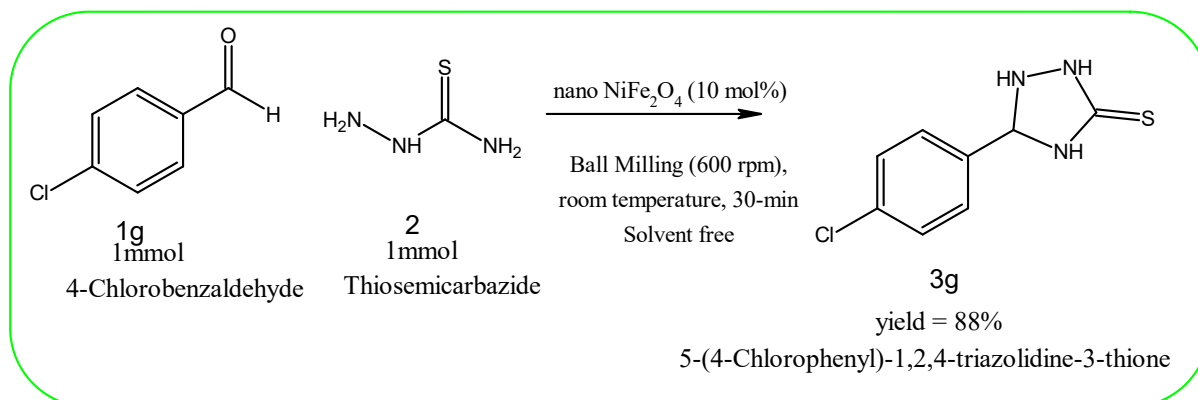

| Parameter                                                                                               | Penalty   |
|---------------------------------------------------------------------------------------------------------|-----------|
| 1. Yield 88%                                                                                            | 6         |
| 2. Price of reaction components                                                                         |           |
| 4-Chlorobenzaldehyde: <b>cheap</b>                                                                      | 0         |
| Thiosemicarbazide: <b>inexpensive</b>                                                                   | 0         |
| nano NiFe <sub>2</sub> O <sub>4</sub> : <b>recyclable, low cost</b>                                     | 0         |
| 3. Safety                                                                                               |           |
| 4-Chlorobenzaldehyde: <b>irritant, harmful if swallowed</b>                                             |           |
| Thiosemicarbazide: <b>acute oral toxicity, irritant</b>                                                 | 3         |
| Nano NiFe <sub>2</sub> O <sub>4</sub> : <b>No highly flammable, explosive, or carcinogenic reagents</b> |           |
| 4. Technical setup                                                                                      |           |
| Unconventional activation technique                                                                     | 2         |
| 5. Temperature/time                                                                                     | 0         |
| Room temperature < 1 h                                                                                  |           |
| 6. Workup & Purification                                                                                |           |
| None                                                                                                    | 0         |
| <b>Total Penalty Points</b>                                                                             | <b>11</b> |

EcoScale Score = 100- Total Penalty Points = 89

**8. EcoScale Score for the synthesis of 5-(2-Hydroxyphenyl)-1,2,4-triazolidine-3-thione (3h) under the ball-milling conditions:**

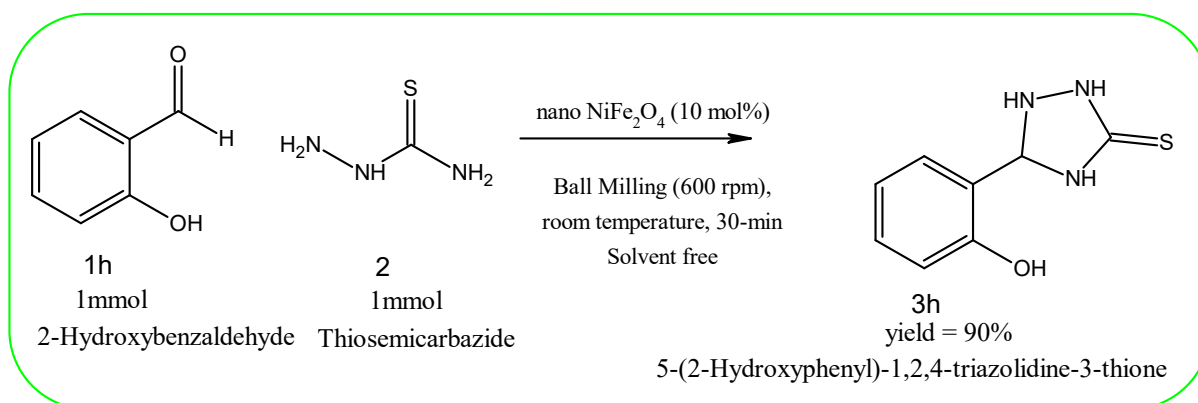

| Parameter                                                                                                                                                                                                                                                 | Penalty     |
|-----------------------------------------------------------------------------------------------------------------------------------------------------------------------------------------------------------------------------------------------------------|-------------|
| 1. Yield 90%                                                                                                                                                                                                                                              | 5           |
| <b>2. Price of reaction components</b><br>2-Hydroxybenzaldehyde: <b>inexpensive and widely available</b><br>Thiosemicarbazide: <b>inexpensive</b><br>nano NiFe <sub>2</sub> O <sub>4</sub> : <b>recyclable, low cost</b>                                  | 0<br>0<br>0 |
| <b>3. Safety</b><br>2-Hydroxybenzaldehyde: <b>mild irritant, low acute toxicity</b><br>Thiosemicarbazide: <b>acute oral toxicity, irritant</b><br>Nano NiFe <sub>2</sub> O <sub>4</sub> : <b>No highly flammable, explosive, or carcinogenic reagents</b> | 3           |
| <b>4. Technical setup</b><br>Unconventional activation technique                                                                                                                                                                                          | 2           |
| <b>5. Temperature/time</b><br>Room temperature < 1 h                                                                                                                                                                                                      | 0           |
| <b>6. Workup &amp; Purification</b><br>None                                                                                                                                                                                                               | 0           |
| <b>Total Penalty Points</b>                                                                                                                                                                                                                               | <b>10</b>   |

**EcoScale Score = 100- Total Penalty Points = 90**

**9. EcoScale Score for the synthesis of 5-(3,4-dimethoxyphenyl)-1,2,4-triazolidine-3-thione (3i) under the ball-milling conditions:**

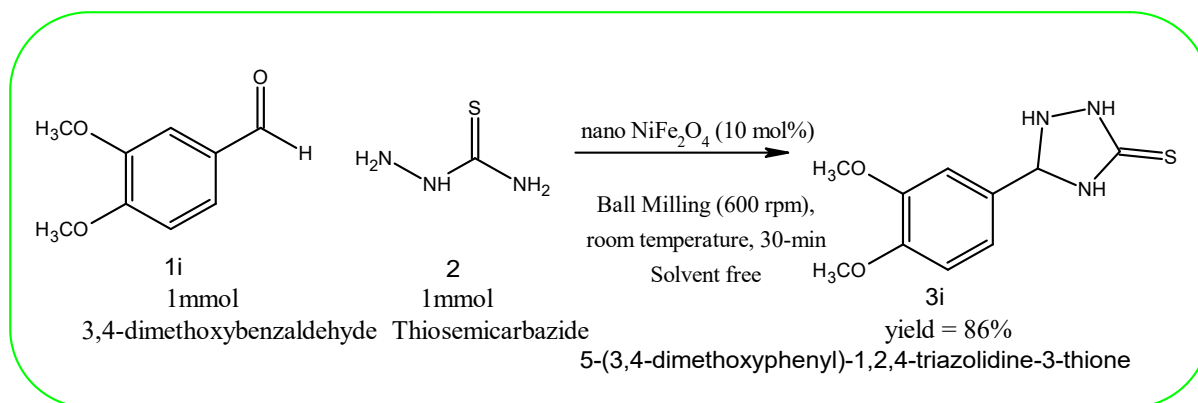

| Parameter                                                                                               | Penalty   |
|---------------------------------------------------------------------------------------------------------|-----------|
| 1. Yield 86%                                                                                            | 7         |
| <b>2. Price of reaction components</b>                                                                  |           |
| 3,4-dimethoxybenzaldehyde: <b>inexpensive and commercially available</b>                                | 0         |
| Thiosemicarbazide: <b>inexpensive</b>                                                                   | 0         |
| nano NiFe <sub>2</sub> O <sub>4</sub> : <b>recyclable, low cost</b>                                     | 0         |
| <b>3. Safety</b>                                                                                        |           |
| 3,4-dimethoxybenzaldehyde: <b>low toxicity, mild irritant</b>                                           |           |
| Thiosemicarbazide: <b>acute oral toxicity, irritant</b>                                                 | 3         |
| Nano NiFe <sub>2</sub> O <sub>4</sub> : <b>No highly flammable, explosive, or carcinogenic reagents</b> |           |
| <b>4. Technical setup</b>                                                                               |           |
| Unconventional activation technique                                                                     | 2         |
| <b>5. Temperature/time</b>                                                                              |           |
| Room temperature < 1 h                                                                                  | 0         |
| <b>6. Workup &amp; Purification</b>                                                                     |           |
| None                                                                                                    | 0         |
| <b>Total Penalty Points</b>                                                                             | <b>12</b> |

**EcoScale Score = 100- Total Penalty Points = 88**

**10. EcoScale Score for the synthesis of 5-(thiophen-2-yl)-1,2,4-triazolidine-3-thione (3j) under the ball-milling conditions:**

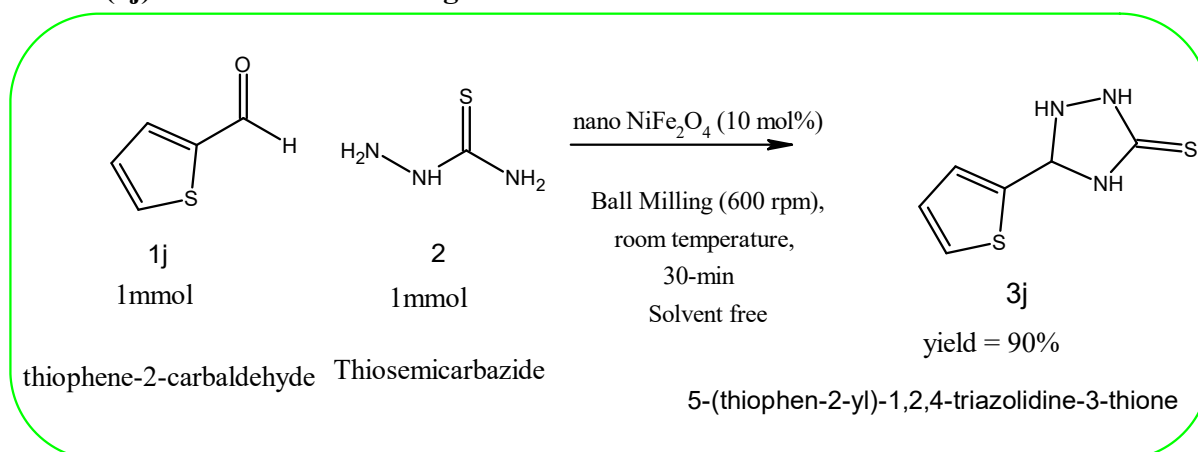

| Parameter                                                                                               | Penalty   |
|---------------------------------------------------------------------------------------------------------|-----------|
| 1. Yield 90%                                                                                            | 5         |
| 2. Price of reaction components                                                                         |           |
| Thiophene-2-carbaldehyde: <b>inexpensive and commercially available at low price</b>                    | 0         |
| Thiosemicarbazide: <b>inexpensive</b>                                                                   | 0         |
| nano NiFe <sub>2</sub> O <sub>4</sub> : <b>recyclable, low cost</b>                                     | 0         |
| 3. Safety                                                                                               |           |
| Thiophene-2-carbaldehyde: <b>lachrymatory, strong odor, irritant</b>                                    |           |
| Thiosemicarbazide: <b>acute oral toxicity, irritant</b>                                                 | 3         |
| Nano NiFe <sub>2</sub> O <sub>4</sub> : <b>No highly flammable, explosive, or carcinogenic reagents</b> |           |
| 4. Technical setup                                                                                      |           |
| Unconventional activation technique                                                                     | 2         |
| 5. Temperature/time                                                                                     |           |
| Room temperature < 1 h                                                                                  | 0         |
| 6. Workup & Purification                                                                                |           |
| None                                                                                                    | 0         |
| <b>Total Penalty Points</b>                                                                             | <b>10</b> |

**EcoScale Score = 100- Total Penalty Points = 90**

**11. EcoScale Score for the synthesis of 5-(4-bromophenyl)-1,2,4-triazolidine-3-thione (3k) under the ball-milling conditions:**

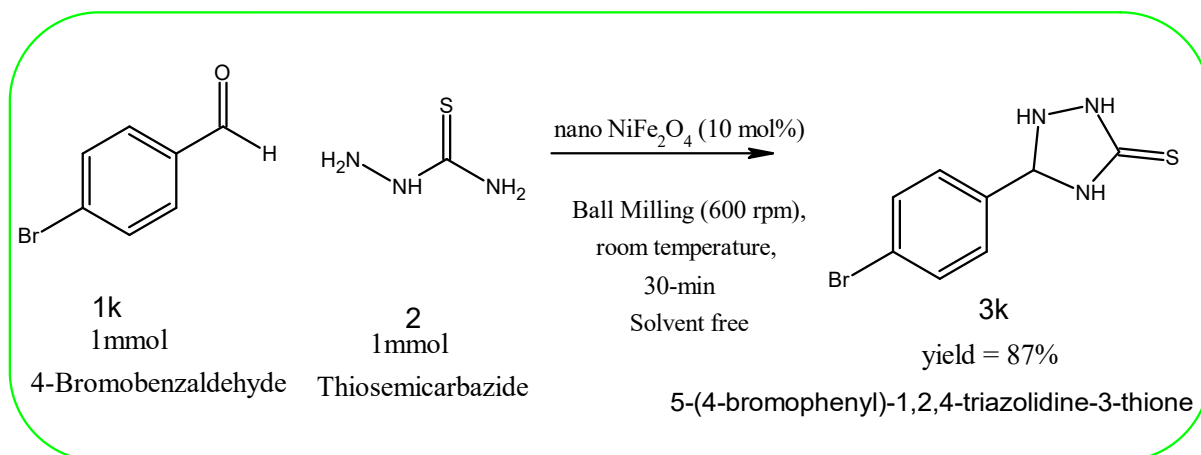

| Parameter                                                                                               | Penalty     |
|---------------------------------------------------------------------------------------------------------|-------------|
| 1. Yield 87%                                                                                            | 6.5         |
| 2. Price of reaction components                                                                         |             |
| 4-Bromobenzaldehyde: <b>inexpensive commercial reagent</b>                                              | 0           |
| Thiosemicarbazide: <b>inexpensive</b>                                                                   | 0           |
| nano NiFe <sub>2</sub> O <sub>4</sub> : <b>recyclable, low cost</b>                                     | 0           |
| 3. Safety                                                                                               |             |
| 4-Bromobenzaldehyde: <b>irritant, harmful if swallowed</b>                                              |             |
| Thiosemicarbazide: <b>acute oral toxicity, irritant</b>                                                 | 3           |
| Nano NiFe <sub>2</sub> O <sub>4</sub> : <b>No highly flammable, explosive, or carcinogenic reagents</b> |             |
| 4. Technical setup                                                                                      |             |
| Unconventional activation technique                                                                     | 2           |
| 5. Temperature/time                                                                                     | 0           |
| Room temperature < 1 h                                                                                  |             |
| 6. Workup & Purification                                                                                |             |
| None                                                                                                    | 0           |
| <b>Total Penalty Points</b>                                                                             | <b>11.5</b> |

**EcoScale Score = 100- Total Penalty Points = 88.5**

**12. EcoScale Score for the synthesis of 5-(furan-2-yl)-1,2,4-triazolidine-3-thione (3I) under the ball-milling conditions:**

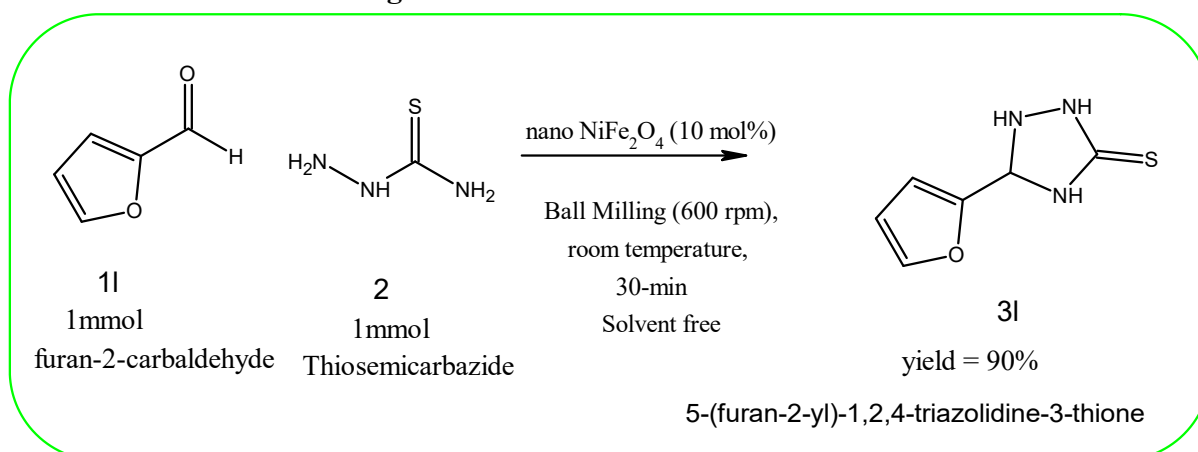

| Parameter                                                                                        | Penalty   |
|--------------------------------------------------------------------------------------------------|-----------|
| 1. Yield 90%                                                                                     | 5         |
| 2. Price of reaction components                                                                  |           |
| furan-2-carbaldehyde: <b>inexpensive commercial reagent</b>                                      | 0         |
| Thiosemicarbazide: <b>inexpensive</b>                                                            | 0         |
| nano $\text{NiFe}_2\text{O}_4$ : <b>recyclable, low cost</b>                                     | 0         |
| 3. Safety                                                                                        |           |
| furan-2-carbaldehyde: <b>irritant, harmful, suspected carcinogen (IARC 2B)</b>                   | 10        |
| Thiosemicarbazide: <b>acute oral toxicity, irritant</b>                                          |           |
| Nano $\text{NiFe}_2\text{O}_4$ : <b>No highly flammable, explosive, or carcinogenic reagents</b> |           |
| 4. Technical setup                                                                               |           |
| Unconventional activation technique                                                              | 2         |
| 5. Temperature/time                                                                              |           |
| Room temperature < 1 h                                                                           | 0         |
| 6. Workup & Purification                                                                         |           |
| None                                                                                             | 0         |
| <b>Total Penalty Points</b>                                                                      | <b>17</b> |

**EcoScale Score = 100- Total Penalty Points = 83**

**13. EcoScale Score for the synthesis of 4-methyl-5-phenyl-1,2,4-triazolidine-3-thione (3m) under the ball-milling conditions:**

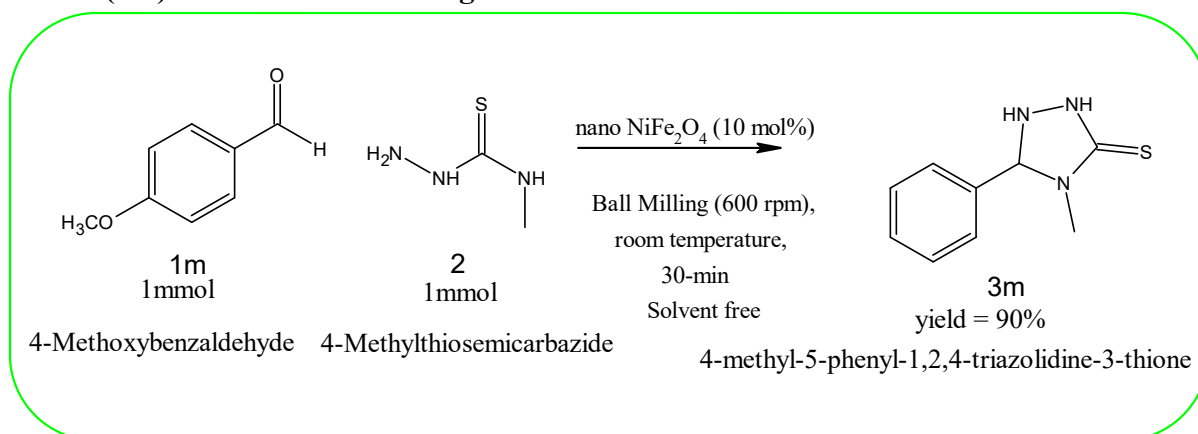

| Parameter                                                                                               | Penalty   |
|---------------------------------------------------------------------------------------------------------|-----------|
| 1. Yield 90%                                                                                            | 5         |
| 2. Price of reaction components                                                                         |           |
| 4-Methoxybenzaldehyde: <b>inexpensive</b>                                                               | 0         |
| 4-Methylthiosemicarbazide: <b>slightly more expensive than unsubstituted</b>                            | 0         |
| nano NiFe <sub>2</sub> O <sub>4</sub> : <b>recyclable, low cost</b>                                     | 0         |
| 3. Safety                                                                                               |           |
| 4-Methoxybenzaldehyde: <b>irritant, harmful, suspected carcinogen (IARC 2B)</b>                         | 3         |
| 4-Methylthiosemicarbazide: <b>acute oral toxicity, irritant</b>                                         |           |
| Nano NiFe <sub>2</sub> O <sub>4</sub> : <b>No highly flammable, explosive, or carcinogenic reagents</b> |           |
| 4. Technical setup                                                                                      |           |
| Unconventional activation technique                                                                     | 2         |
| 5. Temperature/time                                                                                     |           |
| Room temperature < 1 h                                                                                  | 0         |
| 6. Workup & Purification                                                                                |           |
| None                                                                                                    | 0         |
| <b>Total Penalty Points</b>                                                                             | <b>10</b> |

**EcoScale Score = 100- Total Penalty Points = 90**

**14. EcoScale Score for the synthesis of 5-(4-chlorophenyl)-4-methyl-1,2,4-triazolidine-3-thione (3n) under the ball-milling conditions:**

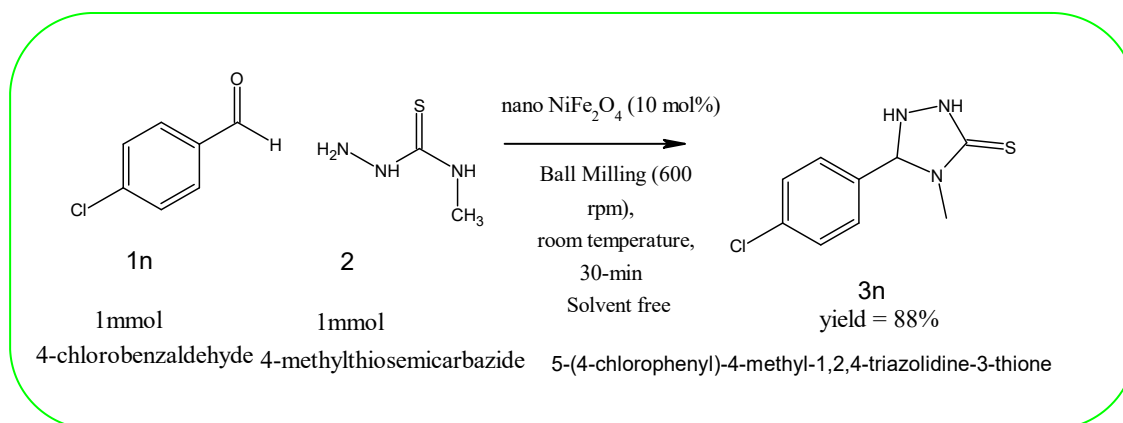

| Parameter                                                                                                                                                                                                                                                           | Penalty     |
|---------------------------------------------------------------------------------------------------------------------------------------------------------------------------------------------------------------------------------------------------------------------|-------------|
| 1. Yield 88%                                                                                                                                                                                                                                                        | 6           |
| 2. Price of reaction components<br>2-Chlorobenzaldehyde: <b>cheap</b><br>4-Methylthiosemicarbazide: <b>slightly more expensive than unsubstituted</b><br>nano NiFe <sub>2</sub> O <sub>4</sub> : <b>recyclable, low cost</b>                                        | 0<br>0<br>0 |
| 3. Safety<br>2-Chlorobenzaldehyde: <b>irritant, lachrymator, harmful if swallowed</b><br>4-Methylthiosemicarbazide: <b>acute oral toxicity, irritant</b><br>Nano NiFe <sub>2</sub> O <sub>4</sub> : <b>No highly flammable, explosive, or carcinogenic reagents</b> | 3           |
| 4. Technical setup<br>Ball milling (mechanochemistry) – special equipment, but no pressure, inert gas, glovebox, or microwave required                                                                                                                              | 2           |
| 5. Temperature/time<br>Room temperature, only 30 minutes → ideal                                                                                                                                                                                                    | 0           |
| 6. Workup & Purification<br>Solvent-free → simple filtration/washing, no chromatography                                                                                                                                                                             | 0           |
| <b>Total Penalty Points</b>                                                                                                                                                                                                                                         | <b>11</b>   |

**EcoScale Score = 100- Total Penalty Points = 89**

**(B) Calculation of E-Factor:****1. E-factor calculation for the synthesis of 3a under ball-milling conditions:**

|                       |                                      |          |           |           |
|-----------------------|--------------------------------------|----------|-----------|-----------|
| Reactant 1 (1a):      | Benzaldehyde                         | 0.1061 g | 1 mmol    | FW 106.12 |
| Reactant 2 (2):       | Thiosemicarbazide                    | 0.0911 g | 1 mmol    | FW 91.13  |
| Reagent/Catalyst      | -----                                | -----    | -----     | -----     |
| Solvent               | -----                                | -----    | -----     | -----     |
| Auxiliary (grinding): | -----                                | -----    | -----     | -----     |
| Product (3a)          | 5-phenyl-1,2,4-triazolidine-3-thione | 0.1741 g | 0.97 mmol | 179.24    |

Product yield = 97%

$$E - factor = \frac{0.1061 + 0.0911 - (0.1741)}{0.1741}$$
$$= 0.0231/0.1741 = \mathbf{0.13 \text{ kg waste per 1 kg}}$$

**2. E-factor calculation for the synthesis of 3b under ball-milling conditions:**

|                       |                                                |          |           |           |
|-----------------------|------------------------------------------------|----------|-----------|-----------|
| Reactant 1 (1b):      | 2-Chlorobenzaldehyde                           | 0.1406 g | 1 mmol    | FW 140.57 |
| Reactant 2 (2):       | Thiosemicarbazide                              | 0.0911 g | 1 mmol    | FW 91.13  |
| Reagent/Catalyst      | -----                                          | -----    | -----     | -----     |
| Solvent               | -----                                          | -----    | -----     | -----     |
| Auxiliary (grinding): | -----                                          | -----    | -----     | -----     |
| Product (3b)          | 5-(2-chlorophenyl)-1,2,4-triazolidine-3-thione | 0.1966 g | 0.92 mmol | 213.69    |

Product yield = 92%

$$E - factor = \frac{0.1406 + 0.0911 - (0.1966)}{0.1966}$$

$$= \frac{0.0351}{0.1966} = 0.17 \text{ kg waste per 1 kg}$$

### 3. E-factor calculation for the synthesis of 3c under ball-milling conditions:

|                       |                                               |          |           |           |
|-----------------------|-----------------------------------------------|----------|-----------|-----------|
| Reactant 1 (1c):      | 4-Nitrobenzaldehyde                           | 0.1511 g | 1 mmol    | FW 151.12 |
| Reactant 2 (2)        | Thiosemicarbazide                             | 0.0911 g | 1 mmol    | FW 91.13  |
| Reagent/Catalyst      | -----                                         | -----    | -----     | -----     |
| Solvent               | -----                                         | -----    | -----     | -----     |
| Auxiliary (grinding): | -----                                         | -----    | -----     | -----     |
| Product (3c)          | 5-(4-Nitrophenyl)-1,2,4-triazolidine-3-thione | 0.2199 g | 0.92 mmol | 224.24    |

Product yield = 92%

$$E - factor = \frac{0.1511 + 0.0911 - (0.2199)}{0.2199} = \frac{0.0223}{0.2199} = 0.10 \text{ kg waste per 1 kg}$$

### 4. E-factor calculation for the synthesis of 3d under ball-milling conditions:

|                       |                                               |          |           |           |
|-----------------------|-----------------------------------------------|----------|-----------|-----------|
| Reactant 1 (1d):      | 2-Nitrobenzaldehyde                           | 0.1511 g | 1 mmol    | FW 151.12 |
| Reactant 2 (2)        | Thiosemicarbazide                             | 0.0911 g | 1 mmol    | FW 91.13  |
| Reagent/Catalyst      | -----                                         | -----    | -----     | -----     |
| Solvent               | -----                                         | -----    | -----     | -----     |
| Auxiliary (grinding): | -----                                         | -----    | -----     | -----     |
| Product (3d)          | 5-(2-Nitrophenyl)-1,2,4-triazolidine-3-thione | 0.2153g  | 0.96 mmol | 224.24    |

Product yield = 96%

$$E - factor = \frac{0.1511 + 0.0911 + (0.2135)}{0.2135}$$

$$= \frac{0.0287}{0.2135} = 0.13 \text{ kg waste per 1 kg}$$

**5. E-factor calculation for the synthesis of 3e under ball-milling conditions:**

|                       |                                                 |          |           |           |
|-----------------------|-------------------------------------------------|----------|-----------|-----------|
| Reactant 1 (1e):      | 4-Hydroxybenzaldehyde                           | 0.1221g  | 1 mmol    | FW 122.12 |
| Reactant 2 (2)        | Thiosemicarbazide                               | 0.0911 g | 1 mmol    | FW 91.13  |
| Reagent/Catalyst      | -----                                           | -----    | -----     | -----     |
| Solvent               | -----                                           | -----    | -----     | -----     |
| Auxiliary (grinding): | -----                                           | -----    | -----     | -----     |
| Product (3e)          | 5-(4-hydroxyphenyl)-1,2,4-triazolidine-3-thione | 0.1738g  | 0.89 mmol | 195.24    |

Product yield = 89%

$$E - factor = \frac{0.1221 + 0.0911 - (0.1738)}{0.1738}$$

$$= \frac{0.0394}{0.1738} = 0.22 \text{ kg waste per 1 kg}$$

**6. E-factor calculation for the synthesis of 3f under ball-milling conditions:**

|                       |                                                 |          |           |           |
|-----------------------|-------------------------------------------------|----------|-----------|-----------|
| Reactant 1 (1f):      | 4-Methoxybenzaldehyde                           | 0.1362 g | 1 mmol    | FW 136.15 |
| Reactant 2 (2)        | Thiosemicarbazide                               | 0.0911 g | 1 mmol    | FW 91.13  |
| Reagent/Catalyst      | -----                                           | -----    | -----     | -----     |
| Solvent               | -----                                           | -----    | -----     | -----     |
| Auxiliary (grinding): | -----                                           | -----    | -----     | -----     |
| Product (3f)          | 5-(4-Methoxyphenyl)-1,2,4-triazolidine-3-thione | 0.1821 g | 0.87 mmol | 209.27    |

Product yield = 87%

$$E - factor = \frac{0.1362 + 0.0911 - (0.1821)}{0.1821}$$

$$= \frac{0.0452}{0.1821} = 0.24 \text{ kg waste per 1 kg}$$

**7. E-factor calculation for the synthesis of 3g under ball-milling conditions:**

|                       |                                                |          |           |           |
|-----------------------|------------------------------------------------|----------|-----------|-----------|
| Reactant 1 (1g):      | 4-Chlorobenzaldehyde                           | 0.1406 g | 1 mmol    | FW 140.57 |
| Reactant 2 (2)        | Thiosemicarbazide                              | 0.0911 g | 1 mmol    | FW 91.13  |
| Reagent/Catalyst      | -----                                          | -----    | -----     | -----     |
| Solvent               | -----                                          | -----    | -----     | -----     |
| Auxiliary (grinding): | -----                                          | -----    | -----     | -----     |
| Product (3g)          | 5-(4-Chlorophenyl)-1,2,4-triazolidine-3-thione | 0.1880 g | 0.87 mmol | 213.69    |

Product yield = 87%

$$E - factor = \frac{0.1406 + 0.0911 - (0.1880)}{0.1880}$$

$$= \frac{0.0437}{0.1880} = 0.23 \text{ kg waste per 1 kg}$$

**8. E-factor calculation for the synthesis of 3h under ball-milling conditions:**

|                       |                       |          |        |           |
|-----------------------|-----------------------|----------|--------|-----------|
| Reactant 1 (1h):      | 2-Hydroxybenzaldehyde | 0.1221g  | 1 mmol | FW 122.12 |
| Reactant 2 (2)        | Thiosemicarbazide     | 0.0911 g | 1 mmol | FW 91.13  |
| Reagent/Catalyst      | -----                 | -----    | -----  | -----     |
| Solvent               | -----                 | -----    | -----  | -----     |
| Auxiliary (grinding): | -----                 | -----    | -----  | -----     |

|              |                                        |          |           |        |
|--------------|----------------------------------------|----------|-----------|--------|
| Product (3h) | 5-(2-Hydroxyphenyl)-1,2,4-triazolidine | 0.1757 g | 0.90 mmol | 195.24 |
|--------------|----------------------------------------|----------|-----------|--------|

Product yield = 90%

$$E - factor = \frac{0.1221 + 0.0911 - (0.1757)}{0.1757}$$

$$= \frac{0.0375}{0.1757} = 0.21 \text{ kg waste per 1 kg}$$

### 9. E-factor calculation for the synthesis of 3i under ball-milling conditions:

|                       |                                                     |          |           |           |
|-----------------------|-----------------------------------------------------|----------|-----------|-----------|
| Reactant 1 (1i):      | 3,4-Dimethoxybenzaldehyde                           | 0.1662 g | 1 mmol    | FW 166.17 |
| Reactant 2 (2)        | Thiosemicarbazide                                   | 0.0911 g | 1 mmol    | FW 91.13  |
| Reagent/Catalyst      | -----                                               | -----    | -----     | -----     |
| Solvent               | -----                                               | -----    | -----     | -----     |
| Auxiliary (grinding): | -----                                               | -----    | -----     | -----     |
| Product (3i)          | 5-(3,4-dimethoxyphenyl)-1,2,4-triazolidine-3-thione | 0.2058 g | 0.86 mmol | 239.29    |

Product yield = 86%

$$E - factor = \frac{0.1662 + 0.0911 - (0.2058)}{0.2058}$$

$$= \frac{0.0515}{0.2058} = 0.25 \text{ kg waste per 1 kg}$$

### 10. E-factor calculation for the synthesis of 3j under ball-milling conditions:

|                       |                          |          |        |           |
|-----------------------|--------------------------|----------|--------|-----------|
| Reactant 1 (1j):      | Thiophene-2-carbaldehyde | 0.1122 g | 1 mmol | FW 112.15 |
| Reactant 2 (2)        | Thiosemicarbazide        | 0.0911 g | 1 mmol | FW 91.13  |
| Reagent/Catalyst      | -----                    | -----    | -----  | -----     |
| Solvent               | -----                    | -----    | -----  | -----     |
| Auxiliary (grinding): | -----                    | -----    | -----  | -----     |

|              |                                               |          |           |        |
|--------------|-----------------------------------------------|----------|-----------|--------|
| Product (3j) | 5-(thiophen-2-yl)-1,2,4-triazolidine-3-thione | 0.1667 g | 0.90 mmol | 185.27 |
|--------------|-----------------------------------------------|----------|-----------|--------|

Product yield = 90%

$$E - factor = \frac{0.1122 + 0.0911 - (0.1667)}{0.1667}$$

$$= \frac{0.0366}{0.1667} = 0.22 \text{ kg waste per 1 kg}$$

#### 11. E-factor calculation for the synthesis of 3k under ball-milling conditions:

|                       |                                               |          |           |           |
|-----------------------|-----------------------------------------------|----------|-----------|-----------|
| Reactant 1 (1k):      | 4-Bromobenzaldehyde                           | 0.1850 g | 1 mmol    | FW 185.02 |
| Reactant 2 (2)        | Thiosemicarbazide                             | 0.0911 g | 1 mmol    | FW 91.13  |
| Reagent/Catalyst      | -----                                         | -----    | -----     | -----     |
| Solvent               | -----                                         | -----    | -----     | -----     |
| Auxiliary (grinding): | -----                                         | -----    | -----     | -----     |
| Product (3k)          | 5-(4-bromophenyl)-1,2,4-triazolidine-3-thione | 0.2246 g | 0.87 mmol | 258.14    |

Product yield = 87%

$$E - factor = \frac{0.1850 + 0.0911 - (0.2246)}{0.2246}$$

$$= \frac{0.0515}{0.2246} = 0.23 \text{ kg waste per 1 kg}$$

#### 12. E-factor calculation for the synthesis of 3l under ball-milling conditions:

|                  |                      |          |        |          |
|------------------|----------------------|----------|--------|----------|
| Reactant 1 (1l): | Furan-2-carbaldehyde | 0.0961g  | 1 mmol | FW 96.08 |
| Reactant 2 (2)   | Thiosemicarbazide    | 0.0911 g | 1 mmol | FW 91.13 |
| Reagent/Catalyst | -----                | -----    | -----  | -----    |

|                       |                                            |          |           |        |
|-----------------------|--------------------------------------------|----------|-----------|--------|
| Solvent               | -----                                      | -----    | -----     | -----  |
| Auxiliary (grinding): | -----                                      | -----    | -----     | -----  |
| Product (3l)          | 5-(furan-2-yl)-1,2,4-triazolidine-3-thione | 0.1523 g | 0.90 mmol | 258.14 |

Product yield = 90%

$$E - factor = \frac{0.0961 + 0.0911 - (0.1523)}{0.1523}$$

$$= \frac{0.0349}{0.1523} = 0.23 \text{ kg waste per 1 kg}$$

### 13. E-factor calculation for the synthesis of 3m under ball-milling conditions:

|                       |                                                          |          |           |           |
|-----------------------|----------------------------------------------------------|----------|-----------|-----------|
| Reactant 1 (1m):      | 4-Methoxybenzaldehyde                                    | 0.1362 g | 1 mmol    | FW 136.15 |
| Reactant 2 (2)        | 4-methylthiosemicarbazide                                | 0.1052g  | 1 mmol    | FW 105.16 |
| Reagent/Catalyst      | -----                                                    | -----    | -----     | -----     |
| Solvent               | -----                                                    | -----    | -----     | -----     |
| Auxiliary (grinding): | -----                                                    | -----    | -----     | -----     |
| Product (3m)          | 5-(4-methoxyphenyl)-4-methyl-1,2,4-triazolidine-3-thione | 0.2010 g | 0.90 mmol | 223.29    |

Product yield = 90%

$$E - factor = \frac{0.1362 + 0.1052 - (0.2010)}{0.2010}$$

$$= \frac{0.0404}{0.2010} = 0.20 \text{ kg waste per 1 kg}$$

### 14. E-factor calculation for the synthesis of 3n under ball-milling conditions:

|                  |                      |          |        |           |
|------------------|----------------------|----------|--------|-----------|
| Reactant 1 (1n): | 4-Chlorobenzaldehyde | 0.1406 g | 1 mmol | FW 140.57 |
|------------------|----------------------|----------|--------|-----------|

|                       |                                                         |          |           |           |
|-----------------------|---------------------------------------------------------|----------|-----------|-----------|
| Reactant 2 (2)        | 4-methylthiosemicarbazide                               | 0.1052g  | 1 mmol    | FW 105.16 |
| Reagent/Catalyst      | -----                                                   | -----    | -----     | -----     |
| Solvent               | -----                                                   | -----    | -----     | -----     |
| Auxiliary (grinding): | -----                                                   | -----    | -----     | -----     |
| Product (3n)          | 5-(4-chlorophenyl)-4-methyl-1,2,4-triazolidine-3-thione | 0.2004 g | 0.88 mmol | 227.71    |

Product yield = 88%

$$E - factor = \frac{0.1406 + 0.1052 - (0.2004)}{0.2004}$$

$$= \frac{0.0454}{0.2004} = 0.23 \text{ kg waste per 1 kg}$$

### (C) Calculation of Atom economy

#### 1. Atom economy for 5-phenyl-1,2,4-triazolidine-3-thione (3a)

| Compound              | Molecular Formula                              | Molar Mass (g/mol) |
|-----------------------|------------------------------------------------|--------------------|
| Benzaldehyde (1a)     | C <sub>7</sub> H <sub>6</sub> O                | 106.12             |
| Thiosemicarbazide (2) | CH <sub>5</sub> N <sub>3</sub> S               | 91.13              |
| Sum of Reactant       |                                                | 197.25             |
| Required Product (3a) | C <sub>8</sub> H <sub>9</sub> N <sub>3</sub> S | 179.24             |
| By-product: - Water   |                                                | 18.02              |

mass balance Check: 106.12 + 91.13 = 197.25

179.24 + 18.02 = 197.26 → perfectly matches

$$\begin{aligned} \text{Atom economy} &= \frac{\text{Molecular weight of required Product}}{\text{Sum of MW of all reactants}} \times 100 \\ &= \frac{179.24}{197.25} \times 100 \\ &= 90.87\% \end{aligned}$$

#### 2. Atom economy for 5-(2-chlorophenyl)-1,2,4-triazolidine-3-thione (3b)

| Compound                  | Molecular Formula                                | Molar Mass (g/mol) |
|---------------------------|--------------------------------------------------|--------------------|
| 2-Chlorobenzaldehyde (1b) | C <sub>7</sub> H <sub>5</sub> ClO                | 140.57             |
| Thiosemicarbazide (2)     | CH <sub>5</sub> N <sub>3</sub> S                 | 91.13              |
| Sum of Reactant           |                                                  | 231.70             |
| Required Product (3b)     | C <sub>8</sub> H <sub>8</sub> ClN <sub>3</sub> S | 213.69             |
| By-product: - Water       |                                                  | 18.02              |

Mass balance check: 140.57 + 91.13 = 231.70

213.69 + 18.02 = 231.71 → perfectly matches

$$\begin{aligned} \text{Atom economy} &= \frac{\text{Molecular weight of required Product}}{\text{Sum of MW of all reactants}} \times 100 \\ &= \frac{213.69}{231.70} \times 100 \\ &= 92.21\% \end{aligned}$$

### 3. Atom economy for 5-(4-Nitrophenyl)-1,2,4-triazolidine-3-thione (3c)

| Compound                 | Molecular Formula                                             | Molar Mass (g/mol) |
|--------------------------|---------------------------------------------------------------|--------------------|
| 4-Nitrobenzaldehyde (1c) | C <sub>7</sub> H <sub>5</sub> NO <sub>3</sub>                 | 151.12             |
| Thiosemicarbazide (2)    | CH <sub>5</sub> N <sub>3</sub> S                              | 91.13              |
| Sum of Reactant          |                                                               | 242.25             |
| Required Product (3c)    | C <sub>8</sub> H <sub>8</sub> N <sub>4</sub> O <sub>2</sub> S | 224.24             |
| By-product: - Water      |                                                               | 18.02              |

Mass balance check: 151.12 + 91.13 = 242.25

224.24 + 18.02 = 242.26 → perfectly matches

$$\begin{aligned} \text{Atom economy} &= \frac{\text{Molecular weight of required Product}}{\text{Sum of MW of all reactants}} \times 100 \\ &= \frac{224.24}{242.25} \times 100 \\ &= 92.58\% \end{aligned}$$

### 4. Atom economy for 5-(2-Nitrophenyl)-1,2,4-triazolidine-3-thione (3d)

| Compound                 | Molecular Formula                                             | Molar Mass (g/mol) |
|--------------------------|---------------------------------------------------------------|--------------------|
| 2-Nitrobenzaldehyde (1d) | C <sub>7</sub> H <sub>5</sub> NO <sub>3</sub>                 | 151.12             |
| Thiosemicarbazide (2)    | CH <sub>5</sub> N <sub>3</sub> S                              | 91.13              |
| Sum of Reactant          |                                                               | 242.25             |
| Required Product (3d)    | C <sub>8</sub> H <sub>8</sub> N <sub>4</sub> O <sub>2</sub> S | 224.24             |
| By-product: - Water      |                                                               | 18.02              |

Mass balance check: 151.12 + 91.13 = 242.25

224.24 + 18.02 = 242.26 → perfectly matches

$$\begin{aligned} \text{Atom economy} &= \frac{\text{Molecular weight of required Product}}{\text{Sum of MW of all reactants}} \times 100 \\ &= \frac{224.24}{242.25} \times 100 \\ &= 92.58\% \end{aligned}$$

### 5. Atom economy for 5-(4-Hydroxyphenyl)-1,2,4-triazolidine-3-thione (3e)

| Compound                   | Molecular Formula                               | Molar Mass (g/mol) |
|----------------------------|-------------------------------------------------|--------------------|
| 4-Hydroxybenzaldehyde (1e) | C <sub>7</sub> H <sub>6</sub> O <sub>2</sub>    | 122.12             |
| Thiosemicarbazide (2)      | CH <sub>5</sub> N <sub>3</sub> S                | 91.13              |
| Sum of Reactant            |                                                 | 213.25             |
| Required Product (3e)      | C <sub>8</sub> H <sub>9</sub> N <sub>3</sub> OS | 195.24             |
| By-product: - Water        |                                                 | 18.02              |

Mass balance check: 122.12 + 91.13 = 213.25

195.24 + 18.02 = 213.26 → perfectly matches

$$\text{Atom economy} = \frac{\text{Molecular weight of required Product}}{\text{Sum of MW of all reactants}} \times 100$$

$$= \frac{195.24}{213.25} \times 100$$

$$= 91.53\%$$

### 6. Atom economy for 5-(4-Methoxyphenyl)-1,2,4-triazolidine-3-thione (3f)

| Compound                   | Molecular Formula                                | Molar Mass (g/mol) |
|----------------------------|--------------------------------------------------|--------------------|
| 4-Methoxybenzaldehyde (1f) | C <sub>8</sub> H <sub>8</sub> O <sub>2</sub>     | 136.15             |
| Thiosemicarbazide (2)      | CH <sub>5</sub> N <sub>3</sub> S                 | 91.13              |
| Sum of Reactant            |                                                  | 227.28             |
| Required Product (3f)      | C <sub>9</sub> H <sub>11</sub> N <sub>3</sub> OS | 209.27             |
| By-product: - Water        |                                                  | 18.02              |

Mass balance check: 136.15 + 91.13 = 227.28

209.27 + 18.02 = 227.29 → perfectly matches

$$\text{Atom economy} = \frac{\text{Molecular weight of required Product}}{\text{Sum of MW of all reactants}} \times 100$$

$$= \frac{209.27}{227.28} \times 100$$

$$= 92.07\%$$

### 7. Atom economy for 5-(4-Chlorophenyl)-1,2,4-triazolidine-3-thione (3g)

| Compound                  | Molecular Formula                                | Molar Mass (g/mol) |
|---------------------------|--------------------------------------------------|--------------------|
| 4-Chlorobenzaldehyde (1g) | C <sub>7</sub> H <sub>5</sub> ClO                | 140.57             |
| Thiosemicarbazide (2)     | CH <sub>5</sub> N <sub>3</sub> S                 | 91.13              |
| Sum of Reactant           |                                                  | 231.70             |
| Required Product (3g)     | C <sub>8</sub> H <sub>8</sub> ClN <sub>3</sub> S | 213.69             |
| By-product: - Water       |                                                  | 18.02              |

Mass balance check: 140.57 + 91.13 = 231.70

213.69 + 18.02 = 231.71 → perfectly matches

$$\begin{aligned}
 \text{Atom economy} &= \frac{\text{Molecular weight of required Product}}{\text{Sum of MW of all reactants}} \times 100 \\
 &= \frac{213.69}{231.69} \times 100 \\
 &= 92.21\%
 \end{aligned}$$

### 8. Atom economy for 5-(2-Hydroxyphenyl)-1,2,4-triazolidine-3-thione (3h)

| Compound                   | Molecular Formula                               | Molar Mass (g/mol) |
|----------------------------|-------------------------------------------------|--------------------|
| 2-Hydroxybenzaldehyde (1h) | C <sub>7</sub> H <sub>6</sub> O <sub>2</sub>    | 122.12             |
| Thiosemicarbazide (2)      | CH <sub>5</sub> N <sub>3</sub> S                | 91.13              |
| Sum of Reactant            |                                                 | 213.25             |
| Required Product (3h)      | C <sub>8</sub> H <sub>9</sub> N <sub>3</sub> OS | 195.24             |
| By-product: - Water        |                                                 | 18.02              |

Mass balance check: 122.12 + 91.13 = 213.25

195.24 + 18.02 = 213.26 → perfect matches

$$\begin{aligned}
 \text{Atom economy} &= \frac{\text{Molecular weight of required Product}}{\text{Sum of MW of all reactants}} \times 100 \\
 &= \frac{195.24}{213.25} \times 100 \\
 &= 91.53\%
 \end{aligned}$$

### 9. Atom economy for 5-(3,4-dimethoxyphenyl)-1,2,4-triazolidine-3-thione (3i)

| Compound                       | Molecular Formula                                               | Molar Mass (g/mol) |
|--------------------------------|-----------------------------------------------------------------|--------------------|
| 3,4-Dimethoxybenzaldehyde (1i) | C <sub>9</sub> H <sub>10</sub> O <sub>3</sub>                   | 166.17             |
| Thiosemicarbazide (2)          | CH <sub>5</sub> N <sub>3</sub> S                                | 91.13              |
| Sum of Reactant                |                                                                 | 257.30             |
| Required Product (3i)          | C <sub>10</sub> H <sub>13</sub> N <sub>3</sub> O <sub>2</sub> S | 239.29             |
| By-product: - Water            |                                                                 | 18.02              |

Mass balance check: 166.17 + 91.13 = 257.30

239.29 + 18.02 = 257.31 → perfectly matches

$$\begin{aligned}
 \text{Atom economy} &= \frac{\text{Molecular weight of required Product}}{\text{Sum of MW of all reactants}} \times 100 \\
 &= \frac{239.29}{257.30} \times 100 \\
 &= 93.00\%
 \end{aligned}$$

### 10. Atom economy for 5-(thiophen-2-yl)-1,2,4-triazolidine-3-thione (3j)

| Compound                      | Molecular Formula                                           | Molar Mass (g/mol) |
|-------------------------------|-------------------------------------------------------------|--------------------|
| Thiophene-2-carbaldehyde (1j) | C <sub>5</sub> H <sub>4</sub> OS                            | 112.15             |
| Thiosemicarbazide (2)         | CH <sub>5</sub> N <sub>3</sub> S                            | 91.13              |
| Sum of Reactant               |                                                             | 203.28             |
| Required Product (3j)         | C <sub>6</sub> H <sub>7</sub> N <sub>3</sub> S <sub>2</sub> | 185.27             |
| By-product: - Water           |                                                             | 18.02              |

Mass balance check: 112.15 + 91.13 = 203.28

185.27 + 18.02 = 203.29 → perfectly matches

$$\begin{aligned}
 \text{Atom economy} &= \frac{\text{Molecular weight of required Product}}{\text{Sum of MW of all reactants}} \times 100 \\
 &= \frac{185.27}{203.28} \times 100
 \end{aligned}$$

$$= 91.14\%$$

### 11. Atom economy for 5-(4-bromophenyl)-1,2,4-triazolidine-3-thione (3k)

| Compound                 | Molecular Formula                                | Molar Mass (g/mol) |
|--------------------------|--------------------------------------------------|--------------------|
| 4-Bromobenzaldehyde (1k) | C <sub>7</sub> H <sub>5</sub> BrO                | 185.02             |
| Thiosemicarbazide (2)    | CH <sub>5</sub> N <sub>3</sub> S                 | 91.13              |
| Sum of Reactant          |                                                  | 276.15             |
| Required Product (3k)    | C <sub>8</sub> H <sub>8</sub> BrN <sub>3</sub> S | 258.14             |
| By-product: - Water      |                                                  | 18.02              |

Mass balance check: 185.02 + 91.13 = 276.15

258.14 + 18.02 = 276.16 → perfectly matches

$$\begin{aligned} \text{Atom economy} &= \frac{\text{Molecular weight of required Product}}{\text{Sum of MW of all reactants}} \times 100 \\ &= \frac{258.14}{276.15} \times 100 \\ &= 93.49\% \end{aligned}$$

### 12. Atom economy for 5-(furan-2-yl)-1,2,4-triazolidine-3-thione (3l)

| Compound                  | Molecular Formula                               | Molar Mass (g/mol) |
|---------------------------|-------------------------------------------------|--------------------|
| Furan-2-carbaldehyde (1l) | C <sub>5</sub> H <sub>4</sub> O <sub>2</sub>    | 96.09              |
| Thiosemicarbazide (2)     | CH <sub>5</sub> N <sub>3</sub> S                | 91.13              |
| Sum of Reactant           |                                                 | 187.22             |
| Required Product (3l)     | C <sub>6</sub> H <sub>7</sub> N <sub>3</sub> OS | 169.20             |
| By-product: - Water       |                                                 | 18.02              |

Mass balance check: 96.09 + 91.13 = 187.22

169.20 + 18.02 = 187.22 → perfectly matches

$$\begin{aligned} \text{Atom economy} &= \frac{\text{Molecular weight of required Product}}{\text{Sum of MW of all reactants}} \times 100 \\ &= \frac{169.20}{187.22} \times 100 \end{aligned}$$

$$= 90.35\%$$

### 13. Atom economy for 5-(4-methoxyphenyl)-4-methyl-1,2,4-triazolidine-3-thione (3m)

| Compound                       | Molecular Formula                                 | Molar Mass (g/mol) |
|--------------------------------|---------------------------------------------------|--------------------|
| 4-Methoxybenzaldehyde (1m)     | C <sub>8</sub> H <sub>8</sub> O <sub>2</sub>      | 136.15             |
| 4-Methylthiosemicarbazide (2a) | C <sub>2</sub> H <sub>7</sub> N <sub>3</sub> S    | 105.16             |
| Sum of Reactant                |                                                   | 241.31             |
| Required Product (3m)          | C <sub>10</sub> H <sub>13</sub> N <sub>3</sub> OS | 223.29             |
| By-product: - Water            |                                                   | 18.02              |

Mass balance check: 136.15 + 105.16 = 241.31

223.29 + 18.02 = 241.31 → perfectly matches

$$\begin{aligned} \text{Atom economy} &= \frac{\text{Molecular weight of required Product}}{\text{Sum of MW of all reactants}} \times 100 \\ &= \frac{223.29}{241.31} \times 100 \\ &= 92.56\% \end{aligned}$$

### 14. Atom economy for 5-(4-chlorophenyl)-4-methyl-1,2,4-triazolidine-3-thione (3n)

| Compound                       | Molecular Formula                                 | Molar Mass (g/mol) |
|--------------------------------|---------------------------------------------------|--------------------|
| 4-Chlorobenzaldehyde (1n)      | C <sub>7</sub> H <sub>5</sub> ClO                 | 140.57             |
| 4-Methylthiosemicarbazide (2a) | C <sub>2</sub> H <sub>7</sub> N <sub>3</sub> S    | 105.16             |
| Sum of Reactant                |                                                   | 245.73             |
| Required Product (3n)          | C <sub>9</sub> H <sub>10</sub> ClN <sub>3</sub> S | 227.71             |
| By-product: - Water            |                                                   | 18.02              |

Mass balance check: 140.57 + 105.16 = 245.73

227.71 + 18.02 = 245.73 → perfectly matches

$$\begin{aligned} \text{Atom economy} &= \frac{\text{Molecular weight of required Product}}{\text{Sum of MW of all reactants}} \times 100 \\ &= \frac{227.71}{245.73} \times 100 \end{aligned}$$

= 92.67 %

**(D) Calculation of Green Chemistry Metrics (EcoScale and E-factor) for conventional method.**

**1. EcoScale Score for the synthesis of 5-phenyl-1,2,4-triazolidine-3-thione (3a) under conventional method.**

| Parameter                                                                                                                                                                                                                       | Penalty          |
|---------------------------------------------------------------------------------------------------------------------------------------------------------------------------------------------------------------------------------|------------------|
| 1. Yield 57%                                                                                                                                                                                                                    | 21.5             |
| <b>2. Price of reaction components</b><br>Benzaldehyde: <b>cheap</b><br>Thiosemicarbazide: <b>inexpensive</b><br>nano NiFe <sub>2</sub> O <sub>4</sub> : <b>recyclable, low cost</b><br>Solvent (Ethanol & water): <b>Green</b> | 0<br>0<br>0<br>0 |
| <b>3. Safety</b><br>Benzaldehyde: <b>mild irritant</b><br>Thiosemicarbazide: <b>toxic if swallowed, irritant</b><br>Nano NiFe <sub>2</sub> O <sub>4</sub> : <b>No highly flammable, explosive, or carcinogenic reagents</b>     | 3                |
| <b>4. Technical setup</b><br>Unconventional activation technique                                                                                                                                                                | 2                |
| <b>5. Temperature/time</b><br>Heating > 1 hour                                                                                                                                                                                  | 5                |
| <b>6. Workup &amp; Purification</b>                                                                                                                                                                                             | 5                |
| <b>Total Penalty Points</b>                                                                                                                                                                                                     | <b>36.5</b>      |

**EcoScale Score = 100- Total Penalty Points = 63.5**

## 2. E-factor calculation for the synthesis of 3a under conventional method:

|                       |                                      |          |           |           |
|-----------------------|--------------------------------------|----------|-----------|-----------|
| Reactant 1 (1a):      | Benzaldehyde                         | 0.1061 g | 1 mmol    | FW 106.12 |
| Reactant 2 (2):       | Thiosemicarbazide                    | 0.0911 g | 1 mmol    | FW 91.13  |
| Reagent/Catalyst      | -----                                | -----    | -----     | -----     |
| Solvent               | EtOH:H <sub>2</sub> O                | 8.945 g  | 5 mL:5 mL | -----     |
| Auxiliary (grinding): | -----                                | -----    | -----     | -----     |
| Product (3a)          | 5-phenyl-1,2,4-triazolidine-3-thione | 0.102 g  | 0.57 mmol | 179.24    |

Product yield = 57%

$$E - factor = \frac{0.1061 + 0.0911 + 8.945 - (0.102)}{0.102}$$

$$= 9.0402/0.102 = 88.6 \text{ kg waste per 1 kg}$$

### SI12: References

62. K. Pradhan, S. Paul and A. R. Das, *Catalysis Science & Technology*, 2014, **4**, 822–831.
63. B. Y. Yu and S. Y. Kwak, *Dalton Transactions*, 2011, **40**, 9989–9998.
64. M. Atif, S. K. Hasanain and M. Nadeem, *Solid State Communications*, 2006, **138**, 416–421.
